# Supplementary material for: Molecular Basis to Integrate Microgravity Signals into the Photoperiodic Flowering Pathway in Arabidopsis thaliana under Spaceflight Condition
Source: MDPI journal article supplement (doi:10.3390/ijms23010063), 2021-12-22
Supplement: s1 [file s1]

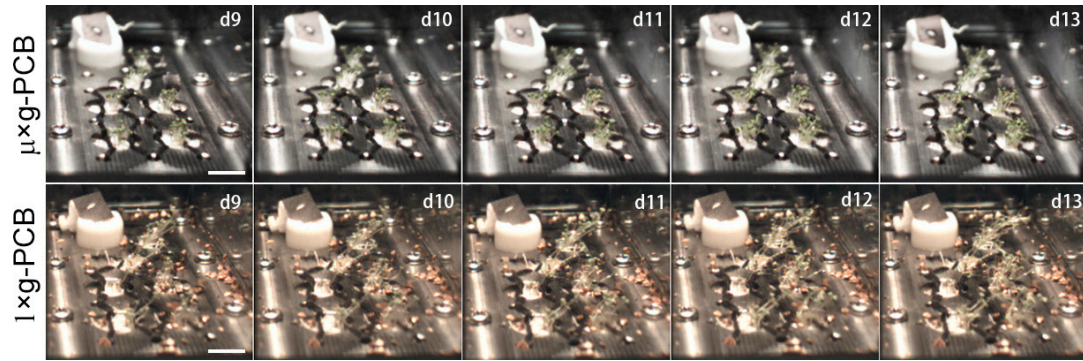

**Supplementary Figure S1.** Time-course series of images showing of Arabidopsis plants under short-day in space and on ground in plant culture box (PCB). The example images showing seedling under short-day condition from 9-13 day after sowing. Note the plants under SD present elongated hypocotyls and cotyledons smaller than those plants that grow with long-day light conditions. Scan bar=10 mm.

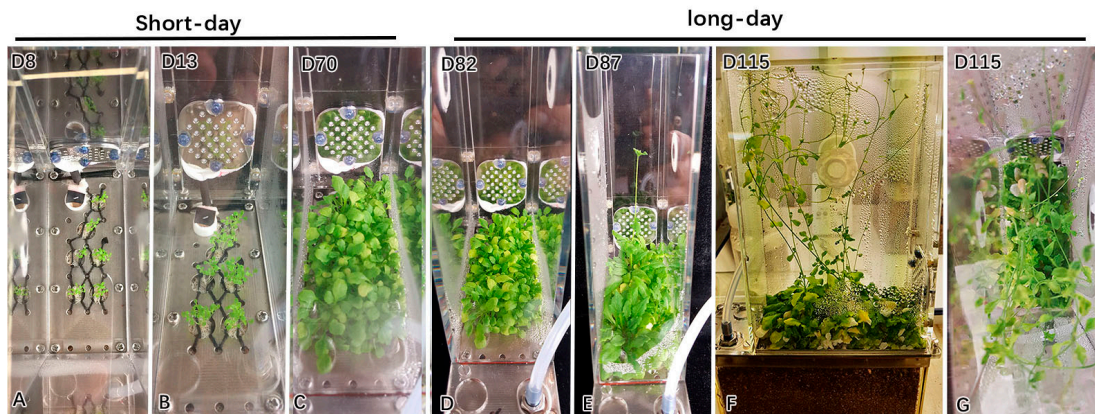

**Supplementary Figure S2.** Time-course series of images showing of Arabidopsis plants on ground in greenhouse. The plants were firstly grown under SD condition for 70 days (A-C), then transferred to LD condition. (D) Plants started to bolting at 87 days after sowing (day 17 after transferred from the SD to the long-day condition). (F and G) Plants started to mature with senescence around day 115 after sowing (day 45 after transferred from the SD to the LD condition).
