# Supplementary material for: Molecular Basis to Integrate Microgravity Signals into the Photoperiodic Flowering Pathway in Arabidopsis thaliana under Spaceflight Condition
Source: MDPI journal article supplement (doi:10.3390/ijms23010063), 2021-12-22
Supplement: s1 [file s1]

**Table S3. Oligonucleotide primers used in this study**

| <b>Description</b>         | <b>Primer name</b>                       | <b>Sequence (5' to 3')</b>                          |
|----------------------------|------------------------------------------|-----------------------------------------------------|
| Primers of <i>ANNAT2</i>   | <i>ANNAT2-F</i><br><i>ANNAT2-R</i>       | CAACACTCAACCACTACAACAACGA<br>TCGTCCGACTCTTCCTTCAAG  |
| Primers of <i>JAZ10</i>    | <i>JAZ10-F</i><br><i>JAZ10-R</i>         | CCGACCACTCTAAGACCAAAGC<br>TGCGATGGGAAGATCTCCTT      |
| Primers of <i>EIN2</i>     | <i>EIN2-F</i><br><i>EIN2-R</i>           | CAACCGCCTACAGGGAGTGAT<br>GGCAAAAGCACGGTGTCAAT       |
| Primers of <i>LAX1</i>     | <i>LAX1-F</i><br><i>LAX1-R</i>           | ATCCCTGCCTTAGCCACAT<br>GCTAGGGATAAAAAACGGTGGTT      |
| Primers of <i>TIR1</i>     | <i>TIR1-F</i><br><i>TIR1-R</i>           | GCTTCTTTGTCAATGCCCTAAAC<br>GCATCCTCGATGTAGTCAAGCA   |
| Primers of <i>XTH19</i>    | <i>XTH19-F</i><br><i>XTH19-R</i>         | TGCTGGAACCGTCACAACA<br>TCGAAATCAATCTCATCCCATGT      |
| Primers of <i>EDF 3</i>    | <i>EDF3-F</i><br><i>EDF3-R</i>           | GAAAACGGTAACGCCAAGTGA<br>CCGCTTGGTGTTTTGGTATAACT    |
| Primers of plant invertase | <i>AT3G17130-F</i><br><i>AT3G17130-R</i> | CCGACGACCTTATCGACAAAA<br>AGGCTTCACATAGGTCGCAGAA     |
| Primers of <i>PIN4</i>     | <i>PIN4-F</i><br><i>PIN4-R</i>           | TTCTCCGTATAGCCATCGTTCA<br>GCAAACACAAACGGAACATTCC    |
| Primers of <i>ANNAT3</i>   | <i>ANNAT3-F</i><br><i>ANNAT3-R</i>       | TGATACTCCTGAGAAACACTTTGCA<br>TCATCTGTTCCAAAACCCTCAA |
| Primers of Actin           | <i>Actin-F</i><br><i>Actin-R</i>         | TACAGTGTCTGGATCGGTGGTT<br>CGGCCTTGGAGATCCACAT       |
