# Supplementary material for: Molecular Basis to Integrate Microgravity Signals into the Photoperiodic Flowering Pathway in Arabidopsis thaliana under Spaceflight Condition
Source: Int J Mol Sci. 2021 Dec 22;23(1):63. doi: 10.3390/ijms23010063 (PMC8744661; doi:10.3390/ijms23010063)
Supplement: Supplementary file 1 [file ijms-23-00063-s001.zip]

Archive with 4 entries (4 files):
- Supplementary Figures S1 and S2.pdf
- Supplementary Table S1.xlsx
- Supplementary Table S2.xlsx
- Supplementary Table S3.pdf
