# Supplementary material for: Molecular Basis to Integrate Microgravity Signals into the Photoperiodic Flowering Pathway in Arabidopsis thaliana under Spaceflight Condition
Source: Int J Mol Sci. 2021 Dec 22;23(1):63. doi: 10.3390/ijms23010063 (PMC8744661; doi:10.3390/ijms23010063)
Supplement: Supplementary file 1 [file ijms-23-00063-s001.zip › Supplementary Table S1.xlsx]

## Sheet: total DE average
Table S1 Expression data of identified genes of wild-type (WT) plants grown under the long-day (LD) in spaceflight (µ×g-PCB ) was compared with those on the ground control condition (1×g-PCB).
Probe_Set_ID	Gene_Title	GeneSymbol	Ensembl	Sample_1	Sample_2	value_1	value_2	Fold_change(µ×g-PCB /1×g-PCB )	Log 2 (fold_change)	Pvalue
Up-regulated genes
264886_at	"TPS04 (TERPENE SYNTHASE 04); (E,E)-geranyllinalool synthase"	TPS04	AT1G61120	1×g-PCB	µ×g-PCB	7.35828	3715.83	504.987	8.9801	0.0146646
245275_at	BAM5 (BETA-AMYLASE 5); beta-amylase	BAM5	AT4G15210	1×g-PCB	µ×g-PCB	2.09007	916.312	438.411	8.77614	0.0226558
254996_at	probable receptor-like protein kinase	AT4G10390	AT4G10390	1×g-PCB	µ×g-PCB	7.68275	2778.04	361.595	8.49823	0.0276365
266271_at	ATGSTU6 (ARABIDOPSIS THALIANA GLUTATHIONE S-TRANSFERASE TAU 6); glutathione transferase	ATGSTU6	AT2G29440	1×g-PCB	µ×g-PCB	29.335	6058.01	206.511	7.69008	0.0197182
263539_at	TAT3 (TYROSINE AMINOTRANSFERASE 3); L-tyrosine:2-oxoglutarate aminotransferase/ transaminase	TAT3	AT2G24850	1×g-PCB	µ×g-PCB	80.2869	15503.1	193.096	7.59318	0.00791203
263497_at	COR15A (COLD-REGULATED 15A)	COR15A	AT2G42540	1×g-PCB	µ×g-PCB	94.874	14274.1	150.453	7.23317	0.0175953
251950_at	C2H2-type zinc finger protein	AT3G53600	AT3G53600	1×g-PCB	µ×g-PCB	13.3879	1976.52	147.635	7.20589	0.0140947
264415_at	RAP2.6 (related to AP2 6); DNA binding / transcription factor	RAP2.6	AT1G43160	1×g-PCB	µ×g-PCB	62.1751	9079.01	146.023	7.19005	0.0046101
261922_at	AAE12 (ACYL ACTIVATING ENZYME 12); catalytic	AAE12	AT1G65890	1×g-PCB	µ×g-PCB	6.90103	917.515	132.953	7.05478	0.0304222
249971_at	Eukaryotic aspartyl protease family protein	AT5G19110	AT5G19110	1×g-PCB	µ×g-PCB	36.9713	4314.82	116.707	6.86675	0.0317666
248855_at	anac096 (Arabidopsis NAC domain containing protein 96); transcription factor	anac096	AT5G46590	1×g-PCB	µ×g-PCB	12.6093	1277.35	101.302	6.66252	0.00624877
258941_at	MDHAR (MONODEHYDROASCORBATE REDUCTASE); monodehydroascorbate reductase (NADH)	MDHAR	AT3G09940	1×g-PCB	µ×g-PCB	65.4088	6311.61	96.4948	6.59238	0.0309729
259866_at	calcium-binding protein CML39	AT1G76640	AT1G76640	1×g-PCB	µ×g-PCB	24.0073	2307.71	96.1255	6.58685	0.0299061
248657_at	"peptidyl-prolyl cis-trans isomerase, putative / FK506-binding protein, putative"	ROF2	AT5G48570	1×g-PCB	µ×g-PCB	40.7456	3805.89	93.4064	6.54545	0.00867393
266989_at	JAL23 (JACALIN-RELATED LECTIN 23)	JAL23	AT2G39330	1×g-PCB	µ×g-PCB	29.6482	2735.08	92.2512	6.5275	0.049279
265221_s_at	GAD3 (glutamate decarboxylase 3); calmodulin binding	GAD3	AT2G02000 /// AT2G02010	1×g-PCB	µ×g-PCB	22.2538	1813.98	81.5132	6.34896	0.0214114
250296_at	HSP17.6II (17.6 KDA CLASS II HEAT SHOCK PROTEIN)	HSP17.6II	AT5G12020	1×g-PCB	µ×g-PCB	4.59033	363.024	79.0845	6.30532	0.0315601
252515_at	ATHSP17.4	HSP17.4	AT3G46230	1×g-PCB	µ×g-PCB	15.4591	1166.36	75.4479	6.23741	0.0459069
263161_at	GDSL esterase/lipase	AT1G54020	AT1G54020	1×g-PCB	µ×g-PCB	11.8444	880.555	74.3433	6.21613	0.0332496
250351_at	AT-HSP17.6A (ARABIDOPSIS THALIANA HEAT SHOCK PROTEIN 17.6A); unfolded protein binding	AT-HSP17.6A	AT5G12030	1×g-PCB	µ×g-PCB	17.5262	1269.69	72.4451	6.17882	0.0406967
258037_at	4CL5 (4-coumarate:CoA ligase 5); 4-coumarate-CoA ligase	4CL5	AT3G21230	1×g-PCB	µ×g-PCB	68.2279	4586.06	67.2169	6.07075	0.0284471
252363_at	GDSL esterase/lipase	AT3G48460	AT3G48460	1×g-PCB	µ×g-PCB	30.1661	1890.36	62.665	5.96959	0.0302573
252364_at	RPM1-interacting protein 4 (RIN4)	AT3G48450	AT3G48450	1×g-PCB	µ×g-PCB	46.5702	2849.04	61.1774	5.93493	0.0282044
254898_at	putative cysteine-rich receptor-like protein kinase 32	CRK32	AT4G11480	1×g-PCB	µ×g-PCB	1.94436	111.986	57.595	5.84787	0.0427253
264527_at	FAD-binding and BBE domain-containing protein	AT1G30760	AT1G30760	1×g-PCB	µ×g-PCB	2.81852	156.057	55.3684	5.79099	0.034065
255786_at	ATCLH1 (ARABIDOPSIS THALIANA CORONATINE-INDUCED PROTEIN 1); chlorophyllase	ATCLH1	AT1G19670	1×g-PCB	µ×g-PCB	117.56	6254.97	53.2064	5.73353	0.0217821
256781_at	"disease resistance-responsive, dirigent domain-containing protein"	AT3G13650	AT3G13650	1×g-PCB	µ×g-PCB	45.6179	2387.28	52.332	5.70962	0.0292204
255524_at	ATPMEPCRB; pectinesterase	ATPMEPCRB	AT4G02330	1×g-PCB	µ×g-PCB	72.7465	3005.91	41.3203	5.36878	0.0275651
251751_at	hypothetical protein	AT3G55720	AT3G55720	1×g-PCB	µ×g-PCB	3.30553	129.618	39.2125	5.29324	0.0101522
253060_at	VQ motif-containing protein	AT4G37710	AT4G37710	1×g-PCB	µ×g-PCB	28.4172	1112.6	39.1525	5.29103	0.0440977
260248_at	ATHSP101 (ARABIDOPSIS THALIANA HEAT SHOCK PROTEIN 101); ATP binding / ATPase/ nucleoside-triphosphatase/ nucleotide binding / protein binding	ATHSP101	AT1G74310	1×g-PCB	µ×g-PCB	67.2569	2571.6	38.2355	5.25684	0.0167484
263845_at	pal1 (Phe ammonia lyase 1); phenylalanine ammonia-lyase	pal1	AT2G37040	1×g-PCB	µ×g-PCB	257.137	9729.9	37.8394	5.24182	0.0107709
261278_at	DGL (DONGLE); triacylglycerol lipase	DGL	AT1G05800	1×g-PCB	µ×g-PCB	20.8584	782.405	37.5103	5.22922	0.0399015
247360_at	CYP94B1; electron carrier/ heme binding / iron ion binding / monooxygenase/ oxygen binding	CYP94B1	AT5G63450	1×g-PCB	µ×g-PCB	28.3617	1038.44	36.614	5.19433	0.032582
265572_at	ATACA2 (ALPHA CARBONIC ANHYDRASE 2); carbonate dehydratase/ zinc ion binding	ATACA2	AT2G28210	1×g-PCB	µ×g-PCB	10.9006	398.331	36.5421	5.19149	0.0188538
265030_at	putative G-type lectin S-receptor-like serine/threonine-protein kinase	AT1G61610	AT1G61610	1×g-PCB	µ×g-PCB	57.6663	2070.81	35.9102	5.16632	0.0175546
246340_s_at	FAMT (farnesoic acid carboxyl-O-methyltransferase); S-adenosylmethionine-dependent methyltransferase/ farnesoic acid O-methyltransferase	FAMT	AT3G44860 /// AT3G44870	1×g-PCB	µ×g-PCB	274.87	9649.11	35.1042	5.13357	0.00981291
250365_at	protein kinase family protein	AT5G11410	AT5G11410	1×g-PCB	µ×g-PCB	17.9327	601.501	33.5422	5.0679	0.0127644
248090_at	MAPKKK15; ATP binding / kinase/ protein kinase/ protein serine/threonine kinase	MAPKKK15	AT5G55090	1×g-PCB	µ×g-PCB	14.3055	462.855	32.3551	5.01592	0.0110264
257173_at	SAHH2 (S-ADENOSYL-L-HOMOCYSTEINE (SAH) HYDROLASE 2); adenosylhomocysteinase/ binding / catalytic	SAHH2	AT3G23810	1×g-PCB	µ×g-PCB	210.077	6792.48	32.3333	5.01495	0.0369008
267147_at	2-oxoglutarate (2OG) and Fe(II)-dependent oxygenase-like protein	AT2G38240	AT2G38240	1×g-PCB	µ×g-PCB	31.4111	1006.88	32.0548	5.00247	0.0360449
260556_at	chitinase family protein	AT2G43620	AT2G43620	1×g-PCB	µ×g-PCB	249.774	7986.14	31.9734	4.9988	0.00413144
248358_at	CYP715A1; electron carrier/ heme binding / iron ion binding / monooxygenase/ oxygen binding	CYP715A1	AT5G52400	1×g-PCB	µ×g-PCB	73.9941	2266.36	30.629	4.93682	0.0215833
251456_at	"BGLU27 (BETA GLUCOSIDASE 27); catalytic/ cation binding / hydrolase, hydrolyzing O-glycosyl compounds"	BGLU27	AT3G60120	1×g-PCB	µ×g-PCB	30.6333	916.504	29.9186	4.90297	0.044964
257057_at	---	---	AT3G15310	1×g-PCB	µ×g-PCB	5.04302	148.129	29.3731	4.87642	0.0237183
267206_at	2-oxoglutarate dependent oxygenase-like protein	AT2G30830	AT2G30830	1×g-PCB	µ×g-PCB	6.32193	185.557	29.3512	4.87535	0.0169855
257874_at	---	---	AT3G17110	1×g-PCB	µ×g-PCB	31.324	851.82	27.1939	4.76521	0.0345644
252618_at	LOX2 (LIPOXYGENASE 2); lipoxygenase	LOX2	AT3G45140	1×g-PCB	µ×g-PCB	358.236	9698.53	27.073	4.75878	0.00381324
248793_at	atnudt8 (Arabidopsis thaliana Nudix hydrolase homolog 8); hydrolase	atnudt8	AT5G47240	1×g-PCB	µ×g-PCB	160.014	4300.13	26.8734	4.74811	0.0212498
257320_at	hypothetical protein /// mitovirus RNA-dependent RNA polymerase	ArthMp097 /// AT2G07749	AT2G07749 /// ATMG01110	1×g-PCB	µ×g-PCB	2.77282	70.9717	25.5955	4.67782	0.0502481
247030_at	hypothetical protein	AT5G67210	AT5G67210	1×g-PCB	µ×g-PCB	62.8916	1588.45	25.257	4.65861	0.0147271
261933_at	Class-II DAHP synthetase family protein	AT1G22410	AT1G22410	1×g-PCB	µ×g-PCB	429.456	10474	24.389	4.60816	0.00839818
255088_at	NADH dehydrogenase-like complex T	AT4G09350	AT4G09350	1×g-PCB	µ×g-PCB	4.36017	105.777	24.2599	4.6005	0.00602077
251725_at	hypothetical protein	AT3G56260	AT3G56260	1×g-PCB	µ×g-PCB	16.1355	388.061	24.0502	4.58798	0.0081089
266294_at	HSP20 family protein	AT2G29500	AT2G29500	1×g-PCB	µ×g-PCB	40.2229	949.906	23.6161	4.5617	0.0281145
254387_at	methionine sulfoxide reductase domain-containing protein / SeIR domain-containing protein	ATMSRB9	AT4G21850	1×g-PCB	µ×g-PCB	399.336	9133.93	22.8728	4.51556	0.00630984
264436_at	ERD9 (EARLY-RESPONSIVE TO DEHYDRATION 9); glutathione transferase	ERD9	AT1G10370	1×g-PCB	µ×g-PCB	51.4745	1151.08	22.362	4.48298	0.0258642
245033_at	leucine-rich repeat-containing protein	AT2G26380	AT2G26380	1×g-PCB	µ×g-PCB	29.5589	637.357	21.5623	4.43044	0.0294058
252943_at	CAD9 (CINNAMYL ALCOHOL DEHYDROGENASE 9); binding / catalytic/ oxidoreductase/ zinc ion binding	CAD9	AT4G39330	1×g-PCB	µ×g-PCB	129.01	2765.19	21.434	4.42183	0.0181062
262911_s_at	class I heat shock protein /// HSP20-like chaperone	AT1G07400 /// AT1G59860	AT1G07400 /// AT1G59860	1×g-PCB	µ×g-PCB	106.037	2253.08	21.2479	4.40925	0.0239048
260955_at	flavonol-7-O-rhamnosyltransferase	AT1G06000	AT1G06000	1×g-PCB	µ×g-PCB	47.4917	1007.28	21.2095	4.40664	0.00736372
263210_at	basic helix-loop-helix domain-containing protein	AT1G10585	AT1G10585	1×g-PCB	µ×g-PCB	22.0747	455.861	20.6508	4.36813	0.0307803
267008_at	ABC transporter G family member 1	AT2G39350	AT2G39350	1×g-PCB	µ×g-PCB	82.2204	1680.02	20.4331	4.35283	0.0448862
253050_at	AGP18 (ARABINOGALACTAN PROTEIN 18)	AGP18	AT4G37450	1×g-PCB	µ×g-PCB	22.9137	465.803	20.3286	4.34544	0.0488905
266168_at	PR-6 proteinase inhibitor family protein	AT2G38870	AT2G38870	1×g-PCB	µ×g-PCB	192.454	3864.96	20.0825	4.32787	0.00979449
266326_at	CB5-C (CYTOCHROME B5 ISOFORM C); heme binding	CB5-C	AT2G46650	1×g-PCB	µ×g-PCB	132.978	2658.44	19.9916	4.32132	0.00540712
266841_at	ATHSFA2; DNA binding / transcription factor	ATHSFA2	AT2G26150	1×g-PCB	µ×g-PCB	126.652	2510.77	19.8242	4.30919	0.0499661
264271_at	BGLU6 (BETA GLUCOSIDASE 6)	BGLU6	AT1G60270	1×g-PCB	µ×g-PCB	61.0783	1177.28	19.2749	4.26865	0.0255698
263108_at	aspartyl protease family protein	AT1G65240	AT1G65240	1×g-PCB	µ×g-PCB	17.2964	325.958	18.8454	4.23614	0.00763411
266089_at	Neutral/alkaline non-lysosomal ceramidase	AT2G38010	AT2G38010	1×g-PCB	µ×g-PCB	55.9508	1049.58	18.7589	4.2295	0.0120619
257876_at	plant invertase/pectin methylesterase inhibitor domain-containing protein	AT3G17130	AT3G17130	1×g-PCB	µ×g-PCB	48.145	902.195	18.7391	4.22798	0.034812
263285_at	DOT1 (DEFECTIVELY ORGANIZED TRIBUTARIES 1)	DOT1	AT2G36120	1×g-PCB	µ×g-PCB	17.9018	335.051	18.716	4.2262	0.0429315
265058_s_at	MBP2 (MYROSINASE-BINDING PROTEIN 2); sugar binding / thioglucosidase binding	MBP2	AT1G52030 /// AT1G52040	1×g-PCB	µ×g-PCB	185.166	3462.79	18.7009	4.22504	0.029369
260978_at	HSP20-like chaperone	AT1G53540	AT1G53540	1×g-PCB	µ×g-PCB	15.6025	290.954	18.6479	4.22094	0.0480335
264611_at	putative pectate lyase 1	AT1G04680	AT1G04680	1×g-PCB	µ×g-PCB	74.6094	1385.88	18.5752	4.2153	0.0283391
246488_at	3-oxo-5-alpha-steroid 4-dehydrogenase family protein	AT5G16010	AT5G16010	1×g-PCB	µ×g-PCB	700.551	12941	18.4726	4.20732	0.007686
264718_at	putative L-type lectin-domain containing receptor kinase V.2	AT1G70130	AT1G70130	1×g-PCB	µ×g-PCB	124.592	2300.32	18.4628	4.20655	0.0262547
256169_at	putative leucine-rich repeat protein kinase	AT1G51800	AT1G51800	1×g-PCB	µ×g-PCB	44.8407	822.787	18.3491	4.19764	0.00364577
248100_at	O-Glycosyl hydrolases family 17 protein	AT5G55180	AT5G55180	1×g-PCB	µ×g-PCB	161.682	2960.23	18.3089	4.19447	0.0052787
263838_at	MAT3 (methionine adenosyltransferase 3); copper ion binding / methionine adenosyltransferase	MAT3	AT2G36880	1×g-PCB	µ×g-PCB	533.449	9671.73	18.1306	4.18035	0.00357857
256181_at	putative LRR receptor-like serine/threonine protein kinase	AT1G51820	AT1G51820	1×g-PCB	µ×g-PCB	19.5163	348.645	17.8643	4.15901	0.00484633
245209_at	hypothetical protein	AT5G12340	AT5G12340	1×g-PCB	µ×g-PCB	153.421	2728.39	17.7837	4.15248	0.0393845
264636_at	hypothetical protein	AT1G65490	AT1G65490	1×g-PCB	µ×g-PCB	349.646	6168.85	17.6431	4.14104	0.00729258
260727_at	polygalacturonase	AT1G48100	AT1G48100	1×g-PCB	µ×g-PCB	36.8313	645.961	17.5384	4.13244	0.0435687
245151_at	probable pectinesterase/pectinesterase inhibitor 20	AT2G47550	AT2G47550	1×g-PCB	µ×g-PCB	36.8295	643.968	17.4851	4.12805	0.0411038
266581_at	Late embryogenesis abundant protein	AT2G46140	AT2G46140	1×g-PCB	µ×g-PCB	46.0682	794.542	17.2471	4.10828	0.00105496
245253_at	HPL1 (HYDROPEROXIDE LYASE 1); electron carrier/ heme binding / iron ion binding / monooxygenase	HPL1	AT4G15440	1×g-PCB	µ×g-PCB	46.4308	800.28	17.236	4.10735	0.0163775
263150_at	CIII heat shock protein 17.4	AT1G54050	AT1G54050	1×g-PCB	µ×g-PCB	94.1096	1616.04	17.1719	4.10198	0.0280419
253254_at	SQS2 (SQUALENE SYNTHASE 2); farnesyl-diphosphate farnesyltransferase	SQS2	AT4G34650	1×g-PCB	µ×g-PCB	19.0791	326.404	17.1079	4.09659	0.0329272
259681_at	NIA1 (NITRATE REDUCTASE 1); nitrate reductase	NIA1	AT1G77760	1×g-PCB	µ×g-PCB	43.6144	742.517	17.0246	4.08955	0.0115055
249071_at	MATE efflux family protein	AT5G44050	AT5G44050	1×g-PCB	µ×g-PCB	46.1487	775.901	16.813	4.07151	0.0242192
260051_at	alpha/beta-Hydrolases superfamily protein	AT1G78210	AT1G78210	1×g-PCB	µ×g-PCB	169.524	2849.85	16.8109	4.07132	0.0315918
248118_at	GDSL esterase/lipase	AT5G55050	AT5G55050	1×g-PCB	µ×g-PCB	152.792	2526.53	16.5358	4.04752	0.0184549
266086_at	PHT4;2 (PHOSPHATE TRANSPORTER 4;2); carbohydrate transmembrane transporter/ inorganic phosphate transmembrane transporter/ organic anion transmembrane transporter/ sugar:hydrogen symporter	PHT4;2	AT2G38060	1×g-PCB	µ×g-PCB	6.94	114.554	16.5064	4.04495	0.0398191
266270_at	ATGSTU3 (ARABIDOPSIS THALIANA GLUTATHIONE S-TRANSFERASE TAU 3); glutathione transferase	ATGSTU3	AT2G29470	1×g-PCB	µ×g-PCB	32.709	537.662	16.4377	4.03894	0.046888
251768_at	phosphoinositide phospholipase C 7	AT3G55940	AT3G55940	1×g-PCB	µ×g-PCB	22.9585	376.651	16.4057	4.03613	0.0412921
259400_at	leucine-rich repeat receptor-like protein kinase PEPR2	PEPR2	AT1G17750	1×g-PCB	µ×g-PCB	85.3677	1386.73	16.2442	4.02186	0.0149399
247912_at	AAA-type ATPase family protein	AT5G57480	AT5G57480	1×g-PCB	µ×g-PCB	7.90431	127.821	16.1711	4.01535	0.0241638
249063_at	POP1; transporter	POP1	AT5G44110	1×g-PCB	µ×g-PCB	89.0034	1424.43	16.0042	4.00038	0.0222195
252200_at	HXXXD-type acyl-transferase family protein	AT3G50280	AT3G50280	1×g-PCB	µ×g-PCB	39.5351	629.727	15.9283	3.99352	0.00334156
252123_at	F3H (FLAVANONE 3-HYDROXYLASE); naringenin 3-dioxygenase	F3H	AT3G51240	1×g-PCB	µ×g-PCB	36.6549	576.126	15.7176	3.97431	0.0306272
253697_at	alkaline-phosphatase-like protein	AT4G29700	AT4G29700	1×g-PCB	µ×g-PCB	68.6996	1047.75	15.2512	3.93085	0.00166729
254575_at	UDP-glycosyltransferase family protein	AT4G19460	AT4G19460	1×g-PCB	µ×g-PCB	99.4105	1515.19	15.2418	3.92996	0.00867842
256751_at	CLC-B (CHLORIDE CHANNEL B); anion channel/ voltage-gated chloride channel	CLC-B	AT3G27170	1×g-PCB	µ×g-PCB	33.5172	509.884	15.2126	3.9272	0.0113226
247041_at	"AP2 domain-containing transcription factor, putative"	TOE3	AT5G67180	1×g-PCB	µ×g-PCB	9.98745	151.634	15.1825	3.92433	0.0348139
255132_at	inositol-tetrakisphosphate 1-kinase 2	AT4G08170	AT4G08170	1×g-PCB	µ×g-PCB	164.077	2486.53	15.1546	3.92169	0.0323278
254122_at	"CER2 (ECERIFERUM 2); transferase/ transferase, transferring acyl groups other than amino-acyl groups"	CER2	AT4G24510	1×g-PCB	µ×g-PCB	68.922	1041.91	15.1173	3.91812	0.0308824
250633_at	"PMSR2 (PEPTIDEMETHIONINE SULFOXIDE REDUCTASE 2); oxidoreductase, acting on sulfur group of donors, disulfide as acceptor / peptide-methionine-(S)-S-oxide reductase"	PMSR2	AT5G07460	1×g-PCB	µ×g-PCB	237.397	3586.62	15.1081	3.91725	0.0395882
266486_at	hypothetical protein	AT2G47950	AT2G47950	1×g-PCB	µ×g-PCB	169.409	2544.24	15.0183	3.90865	0.0169152
253842_at	vacuolar iron transporter-like protein	AT4G27860	AT4G27860	1×g-PCB	µ×g-PCB	42.0573	629.981	14.9791	3.90488	9.98346e-06
248770_at	Adenine nucleotide alpha hydrolases-like superfamily protein	AT5G47740	AT5G47740	1×g-PCB	µ×g-PCB	9.33997	139.766	14.9643	3.90345	0.0298753
248332_at	ATHSP90.1 (HEAT SHOCK PROTEIN 90.1); ATP binding / unfolded protein binding	ATHSP90.1	AT5G52640	1×g-PCB	µ×g-PCB	461.355	6870.64	14.8923	3.8965	0.00659644
253627_at	putative low temperature and salt responsive protein	AT4G30650	AT4G30650	1×g-PCB	µ×g-PCB	144.761	2130.14	14.7149	3.87921	0.00713825
247780_at	dehydrodolichyl diphosphate synthase 2	AT5G58770	AT5G58770	1×g-PCB	µ×g-PCB	57.7763	847.087	14.6615	3.87396	0.0129132
259947_at	protein kinase superfamily protein	AT1G71530	AT1G71530	1×g-PCB	µ×g-PCB	2.19902	32.2115	14.6481	3.87264	0.0182935
264400_at	GPT2; antiporter/ glucose-6-phosphate transmembrane transporter	GPT2	AT1G61800	1×g-PCB	µ×g-PCB	81.9723	1200.41	14.644	3.87224	0.0389737
246597_at	AO (L-ASPARTATE OXIDASE); L-aspartate oxidase/ electron carrier/ oxidoreductase	AO	AT5G14760	1×g-PCB	µ×g-PCB	49.6076	724.349	14.6016	3.86805	0.0179678
246944_at	cytochrome bd ubiquinol oxidase	AT5G25450	AT5G25450	1×g-PCB	µ×g-PCB	236.866	3454.97	14.5862	3.86653	0.00979555
260648_at	C3HC4-type RING finger-containing protein	AT1G08050	AT1G08050	1×g-PCB	µ×g-PCB	74.0652	1076.55	14.5351	3.86147	0.0151823
259331_at	SAUR-like auxin-responsive protein	AT3G03840	AT3G03840	1×g-PCB	µ×g-PCB	2.69549	39.1783	14.5348	3.86144	0.0503188
263495_at	COR15B (COLD REGULATED 15B)	COR15B	AT2G42530	1×g-PCB	µ×g-PCB	187.226	2694.8	14.3933	3.84732	0.00439651
257643_at	ethylene response DNA binding factor 3	EDF3	AT3G25730	1×g-PCB	µ×g-PCB	84.79	1219.66	14.3845	3.84644	0.0197579
256186_at	4CL1 (4-COUMARATE:COA LIGASE 1); 4-coumarate-CoA ligase	4CL1	AT1G51680	1×g-PCB	µ×g-PCB	736.486	10526.4	14.2928	3.83722	0.00481796
254385_s_at	methionine sulfoxide reductase domain-containing protein / SeIR domain-containing protein	ATMSRB7	AT4G21830 /// AT4G21840	1×g-PCB	µ×g-PCB	131.785	1873.49	14.2163	3.82947	0.0294561
259655_at	dirigent protein 20	AT1G55210	AT1G55210	1×g-PCB	µ×g-PCB	165.695	2350.56	14.186	3.8264	0.0114286
265188_at	ALDH2B7; 3-chloroallyl aldehyde dehydrogenase/ aldehyde dehydrogenase (NAD)	ALDH2B7	AT1G23800	1×g-PCB	µ×g-PCB	20.7579	294.129	14.1695	3.82471	0.0270484
248769_at	Sec14p-like phosphatidylinositol transfer family protein	AT5G47730	AT5G47730	1×g-PCB	µ×g-PCB	219.062	3091.71	14.1134	3.819	0.00837015
246406_at	ATP binding protein	AT1G57650	AT1G57650	1×g-PCB	µ×g-PCB	4.2916	60.4741	14.0913	3.81673	0.00203565
247600_at	MYB34 (MYB DOMAIN PROTEIN 34); DNA binding / kinase/ transcription activator/ transcription factor	MYB34	AT5G60890	1×g-PCB	µ×g-PCB	148.665	2045.93	13.762	3.78262	0.0358122
254839_at	carboxylate clamp-tetratricopeptide repeat protein	AT4G12400	AT4G12400	1×g-PCB	µ×g-PCB	134.499	1846.74	13.7306	3.77932	0.0101882
251633_at	catalytic/ metal ion binding / metalloendopeptidase/ zinc ion binding protein	AT3G57460	AT3G57460	1×g-PCB	µ×g-PCB	70.1941	955.579	13.6134	3.76695	0.0282872
245034_at	serpin-Z3	AT2G26390	AT2G26390	1×g-PCB	µ×g-PCB	35.3759	481.154	13.6012	3.76566	0.0107627
266743_at	RNS1 (RIBONUCLEASE 1); endoribonuclease/ ribonuclease	RNS1	AT2G02990	1×g-PCB	µ×g-PCB	35.5439	481.208	13.5384	3.75899	0.0259338
253696_at	CKX4 (CYTOKININ OXIDASE 4); amine oxidase/ cytokinin dehydrogenase	CKX4	AT4G29740	1×g-PCB	µ×g-PCB	102.624	1388.39	13.5289	3.75797	0.0168338
249527_at	proline dehydrogenase 2	AT5G38710	AT5G38710	1×g-PCB	µ×g-PCB	156.671	2118.83	13.5241	3.75746	0.0446291
248218_at	hypothetical protein	AT5G53710	AT5G53710	1×g-PCB	µ×g-PCB	21.6683	289.04	13.3393	3.73761	0.0246335
245929_at	alcohol dehydrogenase-like 6	AT5G24760	AT5G24760	1×g-PCB	µ×g-PCB	48.8464	648.578	13.2779	3.73096	0.0418437
266267_at	ATGSTU4 (ARABIDOPSIS THALIANA GLUTATHIONE S-TRANSFERASE TAU 4); glutathione transferase	ATGSTU4	AT2G29460	1×g-PCB	µ×g-PCB	126.628	1665.82	13.1552	3.71756	0.0258751
260392_at	enolase 1	ENO1	AT1G74030	1×g-PCB	µ×g-PCB	28.9217	379.858	13.134	3.71524	0.0138496
250267_at	hypothetical protein	AT5G12930	AT5G12930	1×g-PCB	µ×g-PCB	32.4606	423.957	13.0607	3.70716	0.0235491
247464_at	IQD23 (IQ-domain 23); calmodulin binding	IQD23	AT5G62070	1×g-PCB	µ×g-PCB	142.72	1856.31	13.0067	3.70118	0.0047992
258047_at	4CL2 (4-COUMARATE:COA LIGASE 2); 4-coumarate-CoA ligase	4CL2	AT3G21240	1×g-PCB	µ×g-PCB	109.539	1418.95	12.9538	3.69531	0.0148064
259609_at	TSA1 (TSK-ASSOCIATING PROTEIN 1); calcium ion binding / protein binding	TSA1	AT1G52410	1×g-PCB	µ×g-PCB	142.248	1818.34	12.7829	3.67614	0.0391762
252739_at	hypothetical protein	AT3G43250	AT3G43250	1×g-PCB	µ×g-PCB	127.144	1613.44	12.6898	3.6656	0.0259561
260547_at	defensin-like protein 197	AT2G43550	AT2G43550	1×g-PCB	µ×g-PCB	79.8875	1011.22	12.6581	3.66199	0.0459158
248968_at	pectinacetylesterase family protein	AT5G45280	AT5G45280	1×g-PCB	µ×g-PCB	689.555	8677.2	12.5838	3.65349	0.0300537
261363_at	SKS6 (SKU5-SIMILAR 6); pectinesterase	SKS6	AT1G41830	1×g-PCB	µ×g-PCB	127.505	1594.09	12.5022	3.64411	0.036668
263918_at	ProT3 (PROLINE TRANSPORTER 3); L-proline transmembrane transporter/ amino acid transmembrane transporter	ProT3	AT2G36590	1×g-PCB	µ×g-PCB	41.176	513.874	12.4799	3.64154	0.0085941
258621_at	ZFN1 (ZINC FINGER PROTEIN 1); DNA binding / nuclease/ nucleic acid binding	ZFN1	AT3G02830	1×g-PCB	µ×g-PCB	40.769	506.75	12.4298	3.63573	0.00975445
265853_at	E3 ubiquitin-protein ligase ATL41	AT2G42360	AT2G42360	1×g-PCB	µ×g-PCB	116.535	1428.91	12.2616	3.61608	0.011652
264646_at	BON3 (BONZAI 3); calcium-dependent phospholipid binding	BON3	AT1G08860	1×g-PCB	µ×g-PCB	16.0949	195.472	12.1449	3.60228	0.0155802
259348_at	putative inactive leucine-rich repeat receptor-like protein kinase	AT3G03770	AT3G03770	1×g-PCB	µ×g-PCB	6.76917	81.8792	12.0959	3.59645	0.0362725
263809_at	GDSL esterase/lipase	AT2G04570	AT2G04570	1×g-PCB	µ×g-PCB	16.6433	199.468	11.9849	3.58314	0.0202166
266418_at	ANNAT4 (ANNEXIN ARABIDOPSIS 4); calcium ion binding / calcium-dependent phospholipid binding	ANNAT4	AT2G38750	1×g-PCB	µ×g-PCB	57.3819	685.709	11.9499	3.57893	0.0464829
257363_at	BAP2 (BON ASSOCIATION PROTEIN 2)	BAP2	AT2G45760	1×g-PCB	µ×g-PCB	11.904	141.722	11.9053	3.57354	0.0238289
260277_at	Sterile alpha motif (SAM) domain-containing protein	AT1G80520	AT1G80520	1×g-PCB	µ×g-PCB	65.89	780.485	11.8453	3.56624	0.0287175
249045_at	FAD-binding and BBE domain-containing protein	AT5G44380	AT5G44380	1×g-PCB	µ×g-PCB	4.71455	55.8366	11.8435	3.56602	0.0317163
254740_s_at	SHM4 (serine hydroxymethyltransferase 4); catalytic/ glycine hydroxymethyltransferase/ pyridoxal phosphate binding	SHM4	AT4G13890 /// AT4G13930	1×g-PCB	µ×g-PCB	217.581	2575.06	11.8349	3.56498	0.0106114
262825_at	ADT1 (arogenate dehydratase 1); arogenate dehydratase/ prephenate dehydratase	ADT1	AT1G11790	1×g-PCB	µ×g-PCB	37.7558	443.29	11.741	3.55348	0.02198
252421_at	putative chitinase	AT3G47540	AT3G47540	1×g-PCB	µ×g-PCB	124.664	1461.57	11.724	3.5514	0.0415947
267010_at	SNZ (SCHNARCHZAPFEN); DNA binding / transcription factor	SNZ	AT2G39250	1×g-PCB	µ×g-PCB	9.01786	105.448	11.6933	3.5476	0.00571611
264280_at	"BGLU46 (BETA GLUCOSIDASE 46); catalytic/ cation binding / hydrolase, hydrolyzing O-glycosyl compounds"	BGLU46	AT1G61820	1×g-PCB	µ×g-PCB	56.8442	663.179	11.6666	3.54431	0.0365269
263796_at	AFR (ATTENUATED FAR-RED RESPONSE)	AFR	AT2G24540	1×g-PCB	µ×g-PCB	60.6827	705.748	11.6301	3.5398	0.0262813
251309_at	(+)-neomenthol dehydrogenase	AT3G61220	AT3G61220	1×g-PCB	µ×g-PCB	46.0009	534.04	11.6093	3.53721	0.0149388
261899_at	CCR2 (CINNAMOYL COA REDUCTASE); cinnamoyl-CoA reductase	CCR2	AT1G80820	1×g-PCB	µ×g-PCB	353.848	4101.19	11.5903	3.53484	0.0136598
248226_at	CBS domain-containing protein	AT5G53750	AT5G53750	1×g-PCB	µ×g-PCB	208.755	2413.88	11.5632	3.53147	0.00535281
266246_at	CYP94C1; fatty acid (omega-1)-hydroxylase/ oxygen binding	CYP94C1	AT2G27690	1×g-PCB	µ×g-PCB	238.622	2759.04	11.5624	3.53137	0.00129997
249769_at	SIGE (SIGMA FACTOR E); DNA binding / DNA-directed RNA polymerase/ sigma factor/ transcription factor	SIGE	AT5G24120	1×g-PCB	µ×g-PCB	175.209	2022.94	11.5459	3.52931	0.00274165
256417_s_at	FAD7 (FATTY ACID DESATURASE 7); omega-3 fatty acid desaturase	FAD7	AT3G11170 /// AT5G05580	1×g-PCB	µ×g-PCB	974.01	11223.8	11.5233	3.52648	0.00951414
264145_at	AtMC7 (metacaspase 7); cysteine-type endopeptidase	AtMC7	AT1G79310	1×g-PCB	µ×g-PCB	15.4941	178.059	11.492	3.52256	0.0141237
248200_at	ATOMT1 (O-METHYLTRANSFERASE 1); caffeate O-methyltransferase/ myricetin 3'-O-methyltransferase/ quercetin 3-O-methyltransferase	ATOMT1	AT5G54160	1×g-PCB	µ×g-PCB	551.159	6324.68	11.4752	3.52045	0.0126046
266977_at	alpha/beta-Hydrolases superfamily protein	AT2G39420	AT2G39420	1×g-PCB	µ×g-PCB	430.269	4911.14	11.4141	3.51275	0.00387502
253879_s_at	UDP-glycosyltransferase 79B2 /// UDP-glycosyltransferase 79B3	AT4G27560 /// AT4G27570	AT4G27560 /// AT4G27570	1×g-PCB	µ×g-PCB	230.553	2628.54	11.401	3.51109	0.0227407
257194_at	ATSERAT2;2 (SERINE ACETYLTRANSFERASE 2;2); serine O-acetyltransferase	ATSERAT2;2	AT3G13110	1×g-PCB	µ×g-PCB	314.859	3507.07	11.1386	3.47749	0.00864141
248205_at	hypothetical protein	AT5G54300	AT5G54300	1×g-PCB	µ×g-PCB	411.383	4570.33	11.1097	3.47374	0.0197307
251727_at	hypothetical protein	AT3G56290	AT3G56290	1×g-PCB	µ×g-PCB	118.04	1308.53	11.0855	3.4706	0.00235786
256285_at	MADS-box family protein	AT3G12510	AT3G12510	1×g-PCB	µ×g-PCB	66.9231	735.034	10.9833	3.45723	0.0111492
266596_at	late embryogenesis abundant hydroxyproline-rich glycoprotein	AT2G46150	AT2G46150	1×g-PCB	µ×g-PCB	38.8425	420.723	10.8315	3.43717	0.00843989
253595_at	hypothetical protein	AT4G30830	AT4G30830	1×g-PCB	µ×g-PCB	3.90738	42.2608	10.8156	3.43505	0.0114533
247850_at	probably inactive leucine-rich repeat receptor-like protein kinase	AT5G58150	AT5G58150	1×g-PCB	µ×g-PCB	23.6633	254.397	10.7507	3.42636	0.00600728
259579_at	"PGP14 (P-GLYCOPROTEIN 14); ATPase, coupled to transmembrane movement of substances"	PGP14	AT1G28010	1×g-PCB	µ×g-PCB	33.8449	363.242	10.7325	3.42392	0.0351978
256114_at	hypothetical protein	AT1G16850	AT1G16850	1×g-PCB	µ×g-PCB	295.594	3164.53	10.7057	3.4203	0.0229013
260628_at	ERD (early-responsive to dehydration stress) family protein	AT1G62320	AT1G62320	1×g-PCB	µ×g-PCB	20.2496	216.607	10.6969	3.41912	0.0269594
249167_at	hypothetical protein	AT5G42860	AT5G42860	1×g-PCB	µ×g-PCB	27.1583	290.454	10.6948	3.41884	0.0281104
256178_s_at	ILL5; IAA-amino acid conjugate hydrolase/ metallopeptidase	ILL5	AT1G51760 /// AT1G51780	1×g-PCB	µ×g-PCB	438.102	4675.83	10.6729	3.41588	0.0127652
266826_at	N-acetyl-l-glutamate synthase 1	NAGS1	AT2G22910	1×g-PCB	µ×g-PCB	45.4292	472.929	10.4102	3.37993	0.00762899
257220_at	ATMYB21 (ARABIDOPSIS THALIANA MYB DOMAIN PROTEIN 21); DNA binding / transcription factor	ATMYB21	AT3G27810	1×g-PCB	µ×g-PCB	5.0925	52.8999	10.3878	3.37682	0.0130726
253814_at	hypothetical protein	AT4G28290	AT4G28290	1×g-PCB	µ×g-PCB	490.701	5094.52	10.3821	3.37603	0.00494583
258075_at	HMT-1; homocysteine S-methyltransferase	HMT-1	AT3G25900	1×g-PCB	µ×g-PCB	95.2963	984.573	10.3317	3.36901	0.0194668
248091_at	VTC5 (VITAMIN C DEFECTIVE 5); GDP-D-glucose phosphorylase/ galactose-1-phosphate guanylyltransferase (GDP)/ quercetin 4'-O-glucosyltransferase	VTC5	AT5G55120	1×g-PCB	µ×g-PCB	331.389	3410.79	10.2924	3.36351	0.00404692
256245_at	HSP70 (heat shock protein 70); ATP binding	HSP70	AT3G12580	1×g-PCB	µ×g-PCB	1556.85	15990.7	10.2711	3.36052	0.00264189
262254_at	GLIP5; carboxylesterase/ lipase	GLIP5	AT1G53920	1×g-PCB	µ×g-PCB	32.5027	330.944	10.1821	3.34796	0.0325726
250892_at	"ATCSLA09; mannan synthase/ transferase, transferring glycosyl groups"	ATCSLA09	AT5G03760	1×g-PCB	µ×g-PCB	119.72	1218.22	10.1756	3.34704	0.0328987
248889_at	hypothetical protein	AT5G46230	AT5G46230	1×g-PCB	µ×g-PCB	53.8253	546.515	10.1535	3.34391	0.0163056
263374_at	DNAJ heat shock family protein	AT2G20560	AT2G20560	1×g-PCB	µ×g-PCB	216.611	2186.81	10.0956	3.33565	0.0151163
248377_at	CDGSH iron-sulfur domain-containing protein NEET	AT5G51720	AT5G51720	1×g-PCB	µ×g-PCB	25.9745	261.287	10.0594	3.33047	0.0223733
253372_at	enzyme inhibitor/ pectinesterase	PME44	AT4G33220	1×g-PCB	µ×g-PCB	233.024	2341.55	10.0485	3.32891	0.022474
251970_at	"UGT73D1 (UDP-glucosyl transferase 73D1); UDP-glycosyltransferase/ transferase, transferring hexosyl groups"	UGT73D1	AT3G53150	1×g-PCB	µ×g-PCB	18.2513	182.593	10.0044	3.32256	0.0167097
253293_at	Peroxisomal membrane protein Mpv17/PMP22	AT4G33905	AT4G33905	1×g-PCB	µ×g-PCB	60.1614	593.689	9.86826	3.3028	0.0149127
259033_at	pectinacetylesterase family protein	AT3G09405	AT3G09405	1×g-PCB	µ×g-PCB	106.853	1053.06	9.85516	3.30088	0.0156185
245629_at	protein SMALLER WITH VARIABLE BRANCHES	SVB	AT1G56580	1×g-PCB	µ×g-PCB	459.537	4510.82	9.816	3.29514	0.0232645
257763_s_at	AtRLP37 (Receptor Like Protein 37); kinase/ protein binding	AtRLP37	AT3G23110 /// AT3G23120	1×g-PCB	µ×g-PCB	77.3498	758.13	9.80132	3.29298	0.0110136
253503_at	CYP82C3; electron carrier/ heme binding / iron ion binding / monooxygenase/ oxygen binding	CYP82C3	AT4G31950	1×g-PCB	µ×g-PCB	32.6713	318.032	9.73427	3.28307	0.0258786
263709_at	hypothetical protein	AT1G09310	AT1G09310	1×g-PCB	µ×g-PCB	1133.59	10839.7	9.56235	3.25736	0.0150128
257364_at	hypothetical protein	AT2G45940	AT2G45940	1×g-PCB	µ×g-PCB	7.77469	74.194	9.54302	3.25445	0.00442587
260601_at	ZIP11 (ZINC TRANSPORTER 11 PRECURSOR); cation transmembrane transporter/ metal ion transmembrane transporter	ZIP11	AT1G55910	1×g-PCB	µ×g-PCB	155.132	1470.26	9.47744	3.2445	0.00153188
261758_at	ADT6 (arogenate dehydratase 6); arogenate dehydratase/ prephenate dehydratase	ADT6	AT1G08250	1×g-PCB	µ×g-PCB	91.9667	865.834	9.41465	3.23491	0.019256
252831_at	DHS1 (3-DEOXY-D-ARABINO-HEPTULOSONATE 7-PHOSPHATE SYNTHASE 1); 3-deoxy-7-phosphoheptulonate synthase	DHS1	AT4G39980	1×g-PCB	µ×g-PCB	499.23	4691.89	9.39825	3.23239	0.0192555
259185_at	PPT2 (PHOSPHOENOLPYRUVATE (PEP)/PHOSPHATE TRANSLOCATOR 2); antiporter/ triose-phosphate transmembrane transporter	PPT2	AT3G01550	1×g-PCB	µ×g-PCB	44.7639	419.874	9.37973	3.22955	0.0150549
259037_at	protein Fes1A	Fes1A	AT3G09350	1×g-PCB	µ×g-PCB	402.838	3770.25	9.35923	3.22639	0.0350536
260541_at	defensin-like protein 194	AT2G43530	AT2G43530	1×g-PCB	µ×g-PCB	618.537	5786.61	9.35531	3.22579	0.0157489
257318_at	hypothetical protein /// ATP synthase 9	ArthMp095 /// AT2G07777	AT2G07777 /// ATMG01090	1×g-PCB	µ×g-PCB	26.5125	247.54	9.33674	3.22292	0.00843012
252114_at	strictosidine synthase family protein	AT3G51450	AT3G51450	1×g-PCB	µ×g-PCB	686.206	6399.64	9.32611	3.22128	0.00176592
248311_at	BETA-OHASE 2 (BETA-CAROTENE HYDROXYLASE 2); carotene beta-ring hydroxylase	BETA-OHASE 2	AT5G52570	1×g-PCB	µ×g-PCB	203.163	1892.05	9.31295	3.21924	0.0222294
249732_at	6-phosphogluconolactonase 5	PGL5	AT5G24420	1×g-PCB	µ×g-PCB	122.283	1137.98	9.30619	3.21819	0.0453008
253619_at	glycine-rich protein	AT4G30460	AT4G30460	1×g-PCB	µ×g-PCB	124.539	1154.52	9.2703	3.21262	0.00980628
247175_at	GCL1 (GCR2-LIKE 1); catalytic	GCL1	AT5G65280	1×g-PCB	µ×g-PCB	353.781	3249.9	9.1862	3.19947	0.0153135
258893_at	AtRLP33 (Receptor Like Protein 33); kinase/ protein binding	AtRLP33	AT3G05660	1×g-PCB	µ×g-PCB	49.7673	456.613	9.17496	3.1977	0.0057052
264511_at	"AtGolS3 (Arabidopsis thaliana galactinol synthase 3); transferase, transferring glycosyl groups / transferase, transferring hexosyl groups"	AtGolS3	AT1G09350	1×g-PCB	µ×g-PCB	48.0827	438.827	9.12651	3.19006	0.0361287
255284_at	APR1 (APS REDUCTASE 1); adenylyl-sulfate reductase	APR1	AT4G04610	1×g-PCB	µ×g-PCB	59.0113	536.903	9.09832	3.1856	0.0471042
251770_at	jasmonate-regulated protein JRG21	JRG21	AT3G55970	1×g-PCB	µ×g-PCB	228.611	2051.09	8.97194	3.16542	0.0475267
261570_at	KCS1 (3-KETOACYL-COA SYNTHASE 1); acyltransferase/ fatty acid elongase	KCS1	AT1G01120	1×g-PCB	µ×g-PCB	586.79	5262.74	8.9687	3.1649	0.0238431
249917_at	esterase/lipase/thioesterase family protein	AT5G22460	AT5G22460	1×g-PCB	µ×g-PCB	104.776	939.644	8.9681	3.1648	0.0266121
266590_at	BAG6 (BCL-2-ASSOCIATED ATHANOGENE 6); calmodulin binding / protein binding	BAG6	AT2G46240	1×g-PCB	µ×g-PCB	81.0649	726.769	8.96528	3.16435	0.0327753
257978_at	ATNEK5 (NIMA-RELATED KINASE5); ATP binding / kinase/ protein kinase/ protein serine/threonine kinase/ protein tyrosine kinase	ATNEK5	AT3G20860	1×g-PCB	µ×g-PCB	28.7603	257.619	8.95745	3.16309	0.0376969
263073_at	auxin efflux carrier family protein	AT2G17500	AT2G17500	1×g-PCB	µ×g-PCB	511.457	4572.35	8.93985	3.16025	0.0127415
247109_at	ATPSK5 (PHYTOSULFOKINE 5 PRECURSOR); growth factor	ATPSK5	AT5G65870	1×g-PCB	µ×g-PCB	286.005	2554.98	8.93336	3.1592	0.0259145
266489_at	NPSN11 (NOVEL PLANT SNARE 11); SNAP receptor/ protein transporter	NPSN11	AT2G35190	1×g-PCB	µ×g-PCB	24.6017	219.352	8.91614	3.15642	0.0197052
257951_at	SGP2; GTP binding	SGP2	AT3G21700	1×g-PCB	µ×g-PCB	107.458	955.682	8.89357	3.15276	0.00994326
261187_at	"glucan endo-1,3-beta-glucosidase 11"	AT1G32860	AT1G32860	1×g-PCB	µ×g-PCB	52.1571	463.741	8.89124	3.15238	0.0165199
261501_at	serine/threonine-protein kinase-like protein	AT1G28390	AT1G28390	1×g-PCB	µ×g-PCB	89.9113	796.115	8.85444	3.1464	0.0201223
262369_at	inorganic pyrophosphatase 1	PS2	AT1G73010	1×g-PCB	µ×g-PCB	31.7181	279.815	8.82194	3.1411	0.0337742
246908_at	RD22; nutrient reservoir	RD22	AT5G25610	1×g-PCB	µ×g-PCB	686.861	6035.4	8.78693	3.13536	0.0250242
246082_at	EFR (EF-TU RECEPTOR); ATP binding / kinase/ protein serine/threonine kinase	EFR	AT5G20480	1×g-PCB	µ×g-PCB	21.4459	187.384	8.7375	3.12722	0.024597
250994_at	heat shock protein 70	AT5G02490	AT5G02490	1×g-PCB	µ×g-PCB	765.31	6662.65	8.70582	3.12198	0.00761549
246468_at	"UGT78D2 (UDP-GLUCOSYL TRANSFERASE 78D2); UDP-glycosyltransferase/ anthocyanidin 3-O-glucosyltransferase/ quercetin 3-O-glucosyltransferase/ transferase, transferring glycosyl groups"	UGT78D2	AT5G17050	1×g-PCB	µ×g-PCB	117.006	1006.7	8.60381	3.10497	0.00624137
261261_at	phosphate transporter PHO1-7	AT1G26730	AT1G26730	1×g-PCB	µ×g-PCB	243.605	2084.78	8.55804	3.09728	0.000840575
248248_at	SPDS3 (SPERMIDINE SYNTHASE 3); spermidine synthase/ spermine synthase	SPDS3	AT5G53120	1×g-PCB	µ×g-PCB	333.397	2850.13	8.54876	3.09571	0.00772929
247940_at	PSD2 (phosphatidylserine decarboxylase 2); phosphatidylserine decarboxylase	PSD2	AT5G57190	1×g-PCB	µ×g-PCB	23.142	195.922	8.46605	3.08169	0.0274166
260481_at	"ATFD1 (FERREDOXIN 1); 2 iron, 2 sulfur cluster binding / electron carrier/ iron-sulfur cluster binding"	ATFD1	AT1G10960	1×g-PCB	µ×g-PCB	464.988	3906.61	8.40154	3.07065	0.00855856
252711_at	bifunctional inhibitor/lipid-transfer protein/seed storage 2S albumin superfamily protein	AT3G43720	AT3G43720	1×g-PCB	µ×g-PCB	432.789	3634.85	8.39868	3.07016	0.0290345
250517_at	scpl35 (serine carboxypeptidase-like 35); serine-type carboxypeptidase	scpl35	AT5G08260	1×g-PCB	µ×g-PCB	79.9799	671.687	8.39819	3.07008	0.0287259
245213_at	NPQ4 (NONPHOTOCHEMICAL QUENCHING); chlorophyll binding / xanthophyll binding	NPQ4	AT1G44575	1×g-PCB	µ×g-PCB	251.216	2103.92	8.37495	3.06608	0.030652
263153_s_at	GDSL esterase/lipase /// GDSL esterase/lipase	AT1G54000 /// AT1G54010	AT1G54000 /// AT1G54010	1×g-PCB	µ×g-PCB	95.2277	793.755	8.33533	3.05924	0.00652782
253656_at	emb1353 (embryo defective 1353)	emb1353	AT4G30090	1×g-PCB	µ×g-PCB	24.0519	200.102	8.31961	3.05652	0.00766338
251753_at	hypothetical protein	AT3G55760	AT3G55760	1×g-PCB	µ×g-PCB	19.43	160.797	8.27571	3.04888	0.0199744
245089_at	transketolase	AT2G45290	AT2G45290	1×g-PCB	µ×g-PCB	67.2222	552.641	8.22111	3.03933	0.00447856
254085_at	ATHVA22D	HVA22D	AT4G24960	1×g-PCB	µ×g-PCB	1074.78	8792.69	8.18092	3.03226	0.00572188
256527_at	probable thionin-2.4	AT1G66100	AT1G66100	1×g-PCB	µ×g-PCB	130.484	1064.98	8.16172	3.02887	0.0193836
246976_s_at	ABC1 family protein	AT5G24810	AT5G24810	1×g-PCB	µ×g-PCB	311.65	2542.53	8.15829	3.02827	0.00107159
249774_at	SQP1; squalene monooxygenase	SQP1	AT5G24150	1×g-PCB	µ×g-PCB	36.5631	298.25	8.15713	3.02806	0.0145907
259736_at	"AtGH9C2 (Arabidopsis thaliana glycosyl hydrolase 9C2); carbohydrate binding / catalytic/ hydrolase, hydrolyzing O-glycosyl compounds"	AtGH9C2	AT1G64390	1×g-PCB	µ×g-PCB	111.893	912.459	8.15477	3.02764	0.0264775
254789_at	early nodulin-like protein 19	ENODL19	AT4G12880	1×g-PCB	µ×g-PCB	227.007	1835.07	8.08375	3.01503	0.0289128
253173_at	phospholipase-like (PEARLI 4) family protein	AT4G35110	AT4G35110	1×g-PCB	µ×g-PCB	218.315	1763.81	8.07919	3.01421	0.00764383
252179_at	"GATL2 (Galacturonosyltransferase-like 2); polygalacturonate 4-alpha-galacturonosyltransferase/ transferase, transferring glycosyl groups / transferase, transferring hexosyl groups"	GATL2	AT3G50760	1×g-PCB	µ×g-PCB	235.632	1902.97	8.07604	3.01365	0.00955786
259878_at	indole glucosinolate o-methyltransferase 5	AT1G76790	AT1G76790	1×g-PCB	µ×g-PCB	106.999	860.676	8.04378	3.00787	0.0270427
267425_at	FAD-binding and BBE domain-containing protein	AT2G34810	AT2G34810	1×g-PCB	µ×g-PCB	127.464	1022.63	8.02287	3.00412	0.00323372
246247_at	sec14p-like phosphatidylinositol transfer protein	AT4G36640	AT4G36640	1×g-PCB	µ×g-PCB	304.045	2437.22	8.01598	3.00288	0.000627781
255604_at	protein TRICHOME BIREFRINGENCE-LIKE 26	TBL26	AT4G01080	1×g-PCB	µ×g-PCB	34.4977	275.83	7.99562	2.99921	0.0497687
253237_at	ALDH3I1 (ALDEHYDE DEHYDROGENASE 3|1); 3-chloroallyl aldehyde dehydrogenase/ aldehyde dehydrogenase (NAD)	ALDH3I1	AT4G34240	1×g-PCB	µ×g-PCB	202.354	1617.57	7.99374	2.99887	0.0079229
263405_s_at	MATE efflux family protein /// MATE efflux family protein	AT2G04066 /// AT2G04080	AT2G04066 /// AT2G04080	1×g-PCB	µ×g-PCB	85.2443	680.144	7.97876	2.99616	0.0309943
255261_s_at	FUR1 (FUDR RESISTANT 1); nucleoside transmembrane transporter	FUR1	AT4G05110 /// AT4G05120	1×g-PCB	µ×g-PCB	119.432	950.979	7.96253	2.99323	0.0147984
248639_at	HCT (HYDROXYCINNAMOYL-COA SHIKIMATE/QUINATE HYDROXYCINNAMOYL TRANSFERASE); quinate O-hydroxycinnamoyltransferase/ shikimate O-hydroxycinnamoyltransferase/ transferase	HCT	AT5G48930	1×g-PCB	µ×g-PCB	926.862	7353.36	7.93361	2.98798	0.00538575
256787_at	"ATBFRUCT1; beta-fructofuranosidase/ hydrolase, hydrolyzing O-glycosyl compounds"	ATBFRUCT1	AT3G13790	1×g-PCB	µ×g-PCB	324.117	2557.43	7.89044	2.98011	0.0163581
247210_at	ANNAT2 (Annexin Arabidopsis 2); calcium ion binding / calcium-dependent phospholipid binding	ANNAT2	AT5G65020	1×g-PCB	µ×g-PCB	144.101	1136.57	7.88727	2.97953	0.0257925
255795_at	RD20 (RESPONSIVE TO DESSICATION 20); calcium ion binding	RD20	AT2G33380	1×g-PCB	µ×g-PCB	830.053	6544.95	7.88498	2.97911	0.00610283
259379_at	myb family transcription factor	AT3G16350	AT3G16350	1×g-PCB	µ×g-PCB	33.3144	262.295	7.87334	2.97698	0.00474836
253416_at	pyruvate decarboxylase 1	AT4G33070	AT4G33070	1×g-PCB	µ×g-PCB	6.2483	49.0933	7.85706	2.97399	0.0125664
265418_at	ethylene-responsive transcription factor ERF053	AT2G20880	AT2G20880	1×g-PCB	µ×g-PCB	120.369	941.32	7.82031	2.96723	0.0302817
254060_at	SHB1 (SHORT HYPOCOTYL UNDER BLUE1)	SHB1	AT4G25350	1×g-PCB	µ×g-PCB	13.159	102.903	7.81997	2.96716	0.0273532
265632_at	F-box protein	AT2G14290	AT2G14290	1×g-PCB	µ×g-PCB	720.861	5626.45	7.80519	2.96443	0.0121472
248353_at	CYP96A4; electron carrier/ heme binding / iron ion binding / monooxygenase/ oxygen binding	CYP96A4	AT5G52320	1×g-PCB	µ×g-PCB	192.961	1504.98	7.7994	2.96336	0.00811979
249188_at	HXXXD-type acyl-transferase-like protein	AT5G42830	AT5G42830	1×g-PCB	µ×g-PCB	153.484	1192.68	7.77075	2.95805	0.025992
258805_at	O-glycosyl hydrolases family 17 protein	AT3G04010	AT3G04010	1×g-PCB	µ×g-PCB	292.246	2270.23	7.76823	2.95759	0.0113811
247626_at	L-type lectin-domain containing receptor kinase I.9	AT5G60300	AT5G60300	1×g-PCB	µ×g-PCB	184.535	1433.02	7.76557	2.95709	0.010798
267055_at	PRA1.B4 (PRENYLATED RAB ACCEPTOR 1.B4)	PRA1.B4	AT2G38360	1×g-PCB	µ×g-PCB	162.808	1263.99	7.76373	2.95675	0.0073472
257517_at	hypothetical protein	AT3G16330	AT3G16330	1×g-PCB	µ×g-PCB	46.0241	356.016	7.73542	2.95148	0.0177247
254563_at	ERD3 (early-responsive to dehydration 3)	ERD3	AT4G19120	1×g-PCB	µ×g-PCB	312.736	2412.08	7.71282	2.94726	0.00596452
266419_at	ANNAT3 (ANNEXIN ARABIDOPSIS 3); calcium ion binding / calcium-dependent phospholipid binding	ANNAT3	AT2G38760	1×g-PCB	µ×g-PCB	52.9846	408.072	7.7017	2.94518	0.0309676
256576_at	PMZ; zinc ion binding	PMZ	AT3G28210	1×g-PCB	µ×g-PCB	217.784	1674.6	7.6893	2.94285	0.00869831
258181_at	nitrate transporter 1.3	AT3G21670	AT3G21670	1×g-PCB	µ×g-PCB	423.441	3246.66	7.66733	2.93873	0.0187999
263972_at	hypothetical protein	AT2G42760	AT2G42760	1×g-PCB	µ×g-PCB	981.012	7521.01	7.66658	2.93858	0.0186958
247268_at	Non-specific lipid-transfer protein-like protein	AT5G64080	AT5G64080	1×g-PCB	µ×g-PCB	81.1651	616.697	7.59806	2.92563	0.0291577
260025_at	SGS domain-containing protein	AT1G30070	AT1G30070	1×g-PCB	µ×g-PCB	161.882	1226.34	7.57552	2.92134	0.00104941
250292_at	JAZ10 (JASMONATE-ZIM-DOMAIN PROTEIN 10)	JAZ10	AT5G13220	1×g-PCB	µ×g-PCB	1026.21	7770.79	7.57233	2.92074	0.0096994
262826_at	CYP71B2 (CYTOCHROME P450 71B2); electron carrier/ heme binding / iron ion binding / monooxygenase/ oxygen binding	CYP71B2	AT1G13080	1×g-PCB	µ×g-PCB	185.016	1400.75	7.57098	2.92048	0.0242637
258752_at	ATEXO70H4 (exocyst subunit EXO70 family protein H4); protein binding	ATEXO70H4	AT3G09520	1×g-PCB	µ×g-PCB	74.3724	562.967	7.56956	2.92021	0.0319385
248359_at	hypothetical protein	AT5G52410	AT5G52410	1×g-PCB	µ×g-PCB	46.3252	349.388	7.54208	2.91496	0.00475618
266503_at	Rubber elongation factor protein	AT2G47780	AT2G47780	1×g-PCB	µ×g-PCB	44.1319	332.684	7.53839	2.91426	0.0396029
266299_at	ATGSTU5 (ARABIDOPSIS THALIANA GLUTATHIONE S-TRANSFERASE TAU 5); glutathione binding / glutathione transferase	ATGSTU5	AT2G29450	1×g-PCB	µ×g-PCB	1903.54	14347.9	7.53747	2.91408	0.001778
255842_at	scpl46 (serine carboxypeptidase-like 46); serine-type carboxypeptidase	scpl46	AT2G33530	1×g-PCB	µ×g-PCB	31.4672	237.06	7.53357	2.91333	0.0084931
258349_at	HYH (HY5-HOMOLOG); DNA binding / transcription factor	HYH	AT3G17609	1×g-PCB	µ×g-PCB	115.524	863.168	7.47174	2.90145	0.00229966
254288_at	AESP (ARABIDOPSIS HOMOLOG OF SEPARASE); peptidase	AESP	AT4G22970	1×g-PCB	µ×g-PCB	12.7874	95.0266	7.43124	2.8936	0.00396357
263951_at	NHL12	NHL12	AT2G35960	1×g-PCB	µ×g-PCB	76.4715	568.024	7.42791	2.89296	0.021598
265823_at	CASP-like protein	AT2G35760	AT2G35760	1×g-PCB	µ×g-PCB	66.796	495.882	7.42382	2.89216	0.0142485
256170_at	leucine-rich repeat protein kinase-like protein	AT1G51790	AT1G51790	1×g-PCB	µ×g-PCB	54.0374	400.896	7.41886	2.8912	0.00482204
247706_at	Haloacid dehalogenase-like hydrolase (HAD) superfamily protein	AT5G59480	AT5G59480	1×g-PCB	µ×g-PCB	404.082	2990.67	7.40115	2.88775	0.00538586
252133_at	hypothetical protein	AT3G50900	AT3G50900	1×g-PCB	µ×g-PCB	389.157	2871.4	7.37852	2.88333	0.0102568
264052_at	CYP79B3; electron carrier/ heme binding / iron ion binding / monooxygenase/ oxygen binding	CYP79B3	AT2G22330	1×g-PCB	µ×g-PCB	291.867	2149.05	7.3631	2.88031	0.0327764
260083_at	calcium-dependent lipid-binding domain-containing protein	AT1G63220	AT1G63220	1×g-PCB	µ×g-PCB	26.9131	197.766	7.34831	2.87741	0.00763283
261763_at	"PDR12 (PLEIOTROPIC DRUG RESISTANCE 12); ATPase, coupled to transmembrane movement of substances"	PDR12	AT1G15520	1×g-PCB	µ×g-PCB	97.013	712.302	7.34234	2.87624	0.0321675
260380_at	zinc finger protein CONSTANS-LIKE 7	AT1G73870	AT1G73870	1×g-PCB	µ×g-PCB	24.9321	182.77	7.33071	2.87395	0.0491253
255773_at	SOT17 (SULFOTRANSFERASE 17); desulfoglucosinolate sulfotransferase/ sulfotransferase	SOT17	AT1G18590	1×g-PCB	µ×g-PCB	112.67	821.422	7.29051	2.86602	0.0228398
254318_at	S-adenosyl-L-methionine-dependent methyltransferase domain-containing protein	AT4G22530	AT4G22530	1×g-PCB	µ×g-PCB	63.5509	462.832	7.28285	2.8645	0.0195302
246511_at	UDP-glucose 6-dehydrogenase	AT5G15490	AT5G15490	1×g-PCB	µ×g-PCB	300.887	2166.6	7.20072	2.84814	0.00115806
265042_at	"HAD superfamily, subfamily IIIB acid phosphatase"	AT1G04040	AT1G04040	1×g-PCB	µ×g-PCB	170.797	1228.84	7.19472	2.84694	0.0178235
262813_at	MATE efflux family protein	AT1G11670	AT1G11670	1×g-PCB	µ×g-PCB	283.76	2038.61	7.18426	2.84484	0.0349413
267414_at	MEE23 (MATERNAL EFFECT EMBRYO ARREST 23); FAD binding / catalytic/ electron carrier/ oxidoreductase	MEE23	AT2G34790	1×g-PCB	µ×g-PCB	10.04	71.9773	7.16903	2.84178	0.0139801
250738_at	ASA1 (ANTHRANILATE SYNTHASE ALPHA SUBUNIT 1); anthranilate synthase	ASA1	AT5G05730	1×g-PCB	µ×g-PCB	482.653	3457.73	7.16401	2.84077	0.00545518
248253_at	CRF3 (CYTOKININ RESPONSE FACTOR 3); DNA binding / transcription factor	CRF3	AT5G53290	1×g-PCB	µ×g-PCB	75.1493	538.226	7.1621	2.84038	0.00789316
251785_at	"ATWBC19 (White-Brown Complex homolog 19); ATPase, coupled to transmembrane movement of substances"	ATWBC19	AT3G55130	1×g-PCB	µ×g-PCB	247.426	1768.66	7.14825	2.83759	0.0110637
253276_at	putative caffeoyl-CoA O-methyltransferase	CCoAOMT1	AT4G34050	1×g-PCB	µ×g-PCB	1354.93	9611.78	7.09391	2.82658	0.006259
252921_at	EDS5 (ENHANCED DISEASE SUSCEPTIBILITY 5); antiporter/ multidrug efflux pump/ transporter	EDS5	AT4G39030	1×g-PCB	µ×g-PCB	300.539	2119.31	7.0517	2.81797	0.00773774
267140_at	trihelix transcription factor GT-3b	AT2G38250	AT2G38250	1×g-PCB	µ×g-PCB	71.1548	501.039	7.04153	2.81589	0.00109066
267177_at	RING-H2 finger protein ATL33	AT2G37580	AT2G37580	1×g-PCB	µ×g-PCB	37.9977	267.223	7.03261	2.81406	0.00283525
258133_at	MBF1C (MULTIPROTEIN BRIDGING FACTOR 1C); DNA binding / transcription coactivator/ transcription factor	MBF1C	AT3G24500	1×g-PCB	µ×g-PCB	847.938	5963.06	7.03243	2.81402	0.00998781
253387_at	AtGLDP1 (Arabidopsis thaliana glycine decarboxylase P-protein 1); catalytic/ glycine dehydrogenase (decarboxylating)/ pyridoxal phosphate binding	AtGLDP1	AT4G33010	1×g-PCB	µ×g-PCB	311.84	2188.08	7.01668	2.81079	0.0133659
253489_at	"MGD1 (MONOGALACTOSYL DIACYLGLYCEROL SYNTHASE 1); 1,2-diacylglycerol 3-beta-galactosyltransferase/ UDP-galactosyltransferase/ UDP-glycosyltransferase/ transferase, transferring glycosyl groups"	MGD1	AT4G31780	1×g-PCB	µ×g-PCB	1113.71	7811.59	7.01402	2.81024	0.00883179
261020_at	FAD-binding Berberine family protein	AT1G26390	AT1G26390	1×g-PCB	µ×g-PCB	5.84998	41.0013	7.0088	2.80917	0.0482602
251769_at	CCR3 (ARABIDOPSIS THALIANA CRINKLY4 RELATED 3); kinase	CCR3	AT3G55950	1×g-PCB	µ×g-PCB	187.33	1310.83	6.99741	2.80682	0.0120193
247874_at	protein SUPPRESSOR OF MAX2 1	AT5G57710	AT5G57710	1×g-PCB	µ×g-PCB	320.802	2244.78	6.99741	2.80682	0.00956927
245832_at	EMB1144 (embryo defective 1144); chorismate synthase	EMB1144	AT1G48850	1×g-PCB	µ×g-PCB	486.249	3402.09	6.99659	2.80665	0.011717
265244_at	ATPAO2 (Polyamine oxidase 2); amine oxidase/ electron carrier/ oxidoreductase	ATPAO2	AT2G43018 /// AT2G43020	1×g-PCB	µ×g-PCB	416.628	2914.08	6.99444	2.80621	0.0109537
267112_at	"APK (APS KINASE); ATP binding / adenylylsulfate kinase/ kinase/ transferase, transferring phosphorus-containing groups"	APK	AT2G14750	1×g-PCB	µ×g-PCB	405.1	2811.62	6.94056	2.79505	0.00943962
259381_s_at	NSP1 (NITRILE SPECIFIER PROTEIN 1)	NSP1	AT3G16390 /// AT3G16400 /// AT3G16410	1×g-PCB	µ×g-PCB	1131.49	7829.38	6.91954	2.79068	0.0275252
263787_at	hypothetical protein	AT2G46420	AT2G46420	1×g-PCB	µ×g-PCB	148.204	1021.54	6.8928	2.78509	5.30042e-05
245101_at	"CYP98A3 (cytochrome P450, family 98, subfamily A, polypeptide 3); monooxygenase/ p-coumarate 3-hydroxylase"	CYP98A3	AT2G40890	1×g-PCB	µ×g-PCB	407.144	2803.92	6.88679	2.78383	0.0234863
257066_at	Bifunctional inhibitor/lipid-transfer protein/seed storage 2S albumin superfamily protein	AT3G18280	AT3G18280	1×g-PCB	µ×g-PCB	59.6761	409.752	6.86627	2.77953	0.0335527
260676_at	sugar transporter ERD6-like 4	AT1G19450	AT1G19450	1×g-PCB	µ×g-PCB	564.151	3871.31	6.86219	2.77867	0.00514706
250502_at	MTHSC70-2 (MITOCHONDRIAL HSP70 2); ATP binding	MTHSC70-2	AT5G09590	1×g-PCB	µ×g-PCB	272.404	1867.36	6.85512	2.77718	0.00885792
255340_at	cysteine-rich receptor-like protein kinase 36	CRK36	AT4G04490	1×g-PCB	µ×g-PCB	29.2073	200.179	6.85375	2.77689	0.0492044
255065_s_at	arginine amidohydrolase 2 /// arginase	AT4G08870 /// AT4G08900	AT4G08870 /// AT4G08900	1×g-PCB	µ×g-PCB	327.226	2242.64	6.8535	2.77684	0.0220575
251984_at	PAL2; phenylalanine ammonia-lyase	PAL2	AT3G53260	1×g-PCB	µ×g-PCB	2348.85	16092.1	6.85105	2.77632	0.00208941
256600_at	protein trichome birefringence-like 41	TBL41	AT3G14850	1×g-PCB	µ×g-PCB	9.6802	66.2535	6.84423	2.77489	0.0261833
263739_at	B-box zinc finger family protein	AT2G21320	AT2G21320	1×g-PCB	µ×g-PCB	134.521	918.972	6.83144	2.77219	0.0163356
247945_at	transcription factor bHLH35	AT5G57150	AT5G57150	1×g-PCB	µ×g-PCB	160.761	1096.56	6.82106	2.77	0.0198499
251922_at	Protein kinase protein with tetratricopeptide repeat domain	AT3G54030	AT3G54030	1×g-PCB	µ×g-PCB	198.673	1351.09	6.80058	2.76566	0.00101584
262232_at	Aluminum activated malate transporter family protein	AT1G68600	AT1G68600	1×g-PCB	µ×g-PCB	81.1865	551.751	6.79609	2.76471	0.0351483
245310_at	RALFL31 (ralf-like 31); signal transducer	RALFL31	AT4G13950	1×g-PCB	µ×g-PCB	97.4921	655.713	6.7258	2.74971	0.0187932
260308_at	"ATTAP1; ATPase, coupled to transmembrane movement of substances / transporter"	ATTAP1	AT1G70610	1×g-PCB	µ×g-PCB	93.0952	624.646	6.70976	2.74626	0.0178289
250014_at	TRP1 (tryptophan biosynthesis 1); anthranilate phosphoribosyltransferase	TRP1	AT5G17990	1×g-PCB	µ×g-PCB	351.453	2349.05	6.68382	2.74067	0.00797232
253088_at	FAH1 (FERULIC ACID 5-HYDROXYLASE 1); ferulate 5-hydroxylase/ monooxygenase	FAH1	AT4G36220	1×g-PCB	µ×g-PCB	64.9574	434.145	6.68353	2.74061	0.00369682
252533_at	hypothetical protein	AT3G46110	AT3G46110	1×g-PCB	µ×g-PCB	294.654	1966.21	6.67295	2.73833	0.00148952
247027_at	Subtilisin-like serine endopeptidase family protein	AT5G67090	AT5G67090	1×g-PCB	µ×g-PCB	51.9842	345.736	6.65079	2.73353	0.0140969
249557_at	PR5K; kinase/ transmembrane receptor protein serine/threonine kinase	PR5K	AT5G38280	1×g-PCB	µ×g-PCB	96.941	639.302	6.59476	2.72132	0.0225583
256454_at	putative Isoflavone reductase	AT1G75280	AT1G75280	1×g-PCB	µ×g-PCB	90.4747	595.469	6.58161	2.71844	0.0213589
258577_at	TIR-NBS-LRR class disease resistance protein	AT3G04220	AT3G04220	1×g-PCB	µ×g-PCB	64.2023	422.54	6.58138	2.71839	0.00253459
245200_at	hypothetical protein	AT1G67850	AT1G67850	1×g-PCB	µ×g-PCB	294.849	1940.31	6.58067	2.71823	0.00382677
250337_at	protein N-MYC downregulated-like 2	NDL2	AT5G11790	1×g-PCB	µ×g-PCB	173.22	1139.27	6.57701	2.71743	0.0241463
262180_at	"PGM (PHOSPHOGLYCERATE/BISPHOSPHOGLYCERATE MUTASE); catalytic/ intramolecular transferase, phosphotransferases"	PGM	AT1G78050	1×g-PCB	µ×g-PCB	76.9678	506.077	6.57519	2.71703	0.00677452
257641_s_at	AOC1 (ALLENE OXIDE CYCLASE 1); allene-oxide cyclase	AOC1	AT3G25760 /// AT3G25770	1×g-PCB	µ×g-PCB	3563.69	23431.5	6.57507	2.71701	0.000334894
253689_at	target of trans acting-siR480/255.	AT4G29770	AT4G29770	1×g-PCB	µ×g-PCB	21.0946	138.372	6.55958	2.7136	0.00618216
247517_at	TUDOR-SN protein 2	Tudor2	AT5G61780	1×g-PCB	µ×g-PCB	688.463	4492.44	6.52533	2.70605	0.0119899
251594_at	exostosin family protein	AT3G57630	AT3G57630	1×g-PCB	µ×g-PCB	101.632	660.803	6.50194	2.70087	0.0088153
259640_at	"BGLU18 (BETA GLUCOSIDASE 18); catalytic/ cation binding / hydrolase, hydrolyzing O-glycosyl compounds"	BGLU18	AT1G52400	1×g-PCB	µ×g-PCB	2100.38	13627.5	6.4881	2.6978	0.0211524
262744_at	HXXXD-type acyl-transferase family protein	AT1G28680	AT1G28680	1×g-PCB	µ×g-PCB	195.091	1264.25	6.48029	2.69606	0.00445897
247205_at	PROPEP2 (Elicitor peptide 2 precursor)	PROPEP2	AT5G64890	1×g-PCB	µ×g-PCB	88.0509	569.939	6.47283	2.6944	0.0439369
263807_at	indole-3-glycerol phosphate synthase	AT2G04400	AT2G04400	1×g-PCB	µ×g-PCB	786.846	5083.59	6.46072	2.69169	0.0145613
255259_at	NDB2 (NAD(P)H dehydrogenase B2); FAD binding / disulfide oxidoreductase/ oxidoreductase	NDB2	AT4G05020	1×g-PCB	µ×g-PCB	632.288	4045.17	6.39767	2.67755	0.012734
254917_at	hypothetical protein	AT4G11350	AT4G11350	1×g-PCB	µ×g-PCB	121.74	778.833	6.39753	2.67752	0.0104916
252870_at	"AKN2 (APS-kinase 2); ATP binding / adenylylsulfate kinase/ kinase/ transferase, transferring phosphorus-containing groups"	AKN2	AT4G39940	1×g-PCB	µ×g-PCB	278.709	1780.56	6.38859	2.6755	0.00186178
260153_at	lysophospholipase 2	LysoPL2	AT1G52760	1×g-PCB	µ×g-PCB	601.522	3831.24	6.36925	2.67112	0.012923
249411_at	"SIP1 (seed imbibition 1-like); galactinol-sucrose galactosyltransferase/ hydrolase, hydrolyzing O-glycosyl compounds"	SIP1	AT5G40390	1×g-PCB	µ×g-PCB	631.804	4006.86	6.34194	2.66492	0.00488323
246027_at	glyceraldehyde-3-phosphate dehydrogenase-like protein	AT5G21060	AT5G21060	1×g-PCB	µ×g-PCB	20.2663	128.397	6.3355	2.66346	0.0109021
254667_at	glycine-rich cell wall protein-like protein	AT4G18280	AT4G18280	1×g-PCB	µ×g-PCB	632.785	4007.96	6.33385	2.66308	0.0424182
260551_at	ATTI1; serine-type endopeptidase inhibitor	ATTI1	AT2G43510	1×g-PCB	µ×g-PCB	301.857	1898.98	6.29101	2.65329	0.0437318
253768_at	RabGAP/TBC domain-containing protein	AT4G28550	AT4G28550	1×g-PCB	µ×g-PCB	51.4553	323.104	6.27932	2.65061	0.000273062
259370_at	hypothetical protein	AT1G69050	AT1G69050	1×g-PCB	µ×g-PCB	49.9202	313.227	6.27456	2.64951	0.0131581
267545_at	GRP23 (GLYCINE-RICH PROTEIN 23)	GRP23	AT2G32690	1×g-PCB	µ×g-PCB	129.907	813.78	6.26433	2.64716	0.0269608
262354_at	"VHA-E3 (VACUOLAR H+-ATPASE SUBUNIT E ISOFORM 3); proton-transporting ATPase, rotational mechanism"	VHA-E3	AT1G64200	1×g-PCB	µ×g-PCB	335.498	2101.25	6.26307	2.64687	0.0226115
250483_at	MES5 (METHYL ESTERASE 5); hydrolase	MES5	AT5G10300	1×g-PCB	µ×g-PCB	466.642	2921.46	6.26061	2.6463	0.0205672
255595_at	Chitinase family protein	AT4G01700	AT4G01700	1×g-PCB	µ×g-PCB	250.818	1566.87	6.24703	2.64317	0.0210478
265118_at	acid beta-fructofuranosidase 3	AT1G62660	AT1G62660	1×g-PCB	µ×g-PCB	324.748	2026.98	6.24169	2.64194	0.0205988
267470_at	C4H (CINNAMATE-4-HYDROXYLASE); trans-cinnamate 4-monooxygenase	C4H	AT2G30490	1×g-PCB	µ×g-PCB	1688.56	10527.2	6.23439	2.64025	0.007423
256880_at	SRPBCC ligand-binding domain-containing protein	AT3G26450	AT3G26450	1×g-PCB	µ×g-PCB	367.363	2278.73	6.20295	2.63296	0.0187434
257466_at	hypothetical protein	AT1G62840	AT1G62840	1×g-PCB	µ×g-PCB	114.762	711.68	6.20138	2.63259	0.0380545
254112_at	"Histidine kinase-, DNA gyrase B-, and HSP90-like ATPase family protein"	AT4G24970	AT4G24970	1×g-PCB	µ×g-PCB	15.1024	93.6511	6.20105	2.63251	0.00725078
247549_at	MYB28 (myb domain protein 28); DNA binding / transcription factor	MYB28	AT5G61420	1×g-PCB	µ×g-PCB	62.313	386.387	6.20075	2.63244	0.00295367
244954_s_at	hypothetical protein /// ribulose-bisphosphate carboxylase	ArthMp025 /// AT2G07732	AT2G07732 /// ATMG00280	1×g-PCB	µ×g-PCB	16.687	103.426	6.198	2.6318	0.0341434
248045_at	HSP81-2 (HEAT SHOCK PROTEIN 81-2); ATP binding	HSP81-2	AT5G56030	1×g-PCB	µ×g-PCB	1583.24	9754.62	6.16118	2.62321	0.000240608
265053_at	mannose-binding lectin superfamily protein	AT1G52000	AT1G52000	1×g-PCB	µ×g-PCB	177.455	1091.93	6.15328	2.62135	0.042133
258470_at	glycoprotein membrane precursor GPI-anchored protein	AT3G06035	AT3G06035	1×g-PCB	µ×g-PCB	63.777	392.321	6.15145	2.62093	0.0293391
245792_at	PRR1 (PINORESINOL REDUCTASE 1); pinoresinol reductase	PRR1	AT1G32100	1×g-PCB	µ×g-PCB	48.8648	300.58	6.15126	2.62088	0.0327473
253162_at	PSAT; O-phospho-L-serine:2-oxoglutarate aminotransferase	PSAT	AT4G35630	1×g-PCB	µ×g-PCB	910.632	5600.03	6.14961	2.62049	0.010195
253608_at	"XTH19 (XYLOGLUCAN ENDOTRANSGLUCOSYLASE/HYDROLASE 19); hydrolase, acting on glycosyl bonds / hydrolase, hydrolyzing O-glycosyl compounds / xyloglucan:xyloglucosyl transferase"	XTH19	AT4G30290	1×g-PCB	µ×g-PCB	746.872	4587.28	6.142	2.61871	0.0269248
248199_at	lipid-binding START domain-containing protein	AT5G54170	AT5G54170	1×g-PCB	µ×g-PCB	2425.54	14888.3	6.13814	2.6178	0.00136591
258003_at	EXPA5 (EXPANSIN A5)	EXPA5	AT3G29030	1×g-PCB	µ×g-PCB	80.3975	493.142	6.13379	2.61678	0.0403571
248227_at	Late embryogenesis abundant protein (LEA) family protein	AT5G53820	AT5G53820	1×g-PCB	µ×g-PCB	5.94562	36.3753	6.11799	2.61306	0.0417808
262619_at	3-hydroxyisobutyryl-CoA hydrolase-like protein 5	AT1G06550	AT1G06550	1×g-PCB	µ×g-PCB	99.6035	607.916	6.10336	2.6096	0.0239233
259660_at	Bifunctional inhibitor/lipid-transfer protein/seed storage 2S albumin superfamily protein	AT1G55260	AT1G55260	1×g-PCB	µ×g-PCB	252.165	1537.98	6.09911	2.6086	0.0447689
248961_at	subtilase family protein	AT5G45650	AT5G45650	1×g-PCB	µ×g-PCB	41.3522	252.138	6.09733	2.60818	0.0143378
267175_s_at	ACT1 (ACTIN 1); structural constituent of cytoskeleton	ACT1	AT2G37620 /// AT3G53750	1×g-PCB	µ×g-PCB	117.449	714.961	6.08744	2.60584	0.0210997
261958_at	glutaredoxin-like protein	AT1G64500	AT1G64500	1×g-PCB	µ×g-PCB	119.863	729.617	6.08707	2.60575	0.00192325
245533_at	catalytic/ choline-phosphate cytidylyltransferase/ nucleotidyltransferase	CCT2	AT4G15130	1×g-PCB	µ×g-PCB	226.585	1376.91	6.07678	2.60331	0.0127176
260239_at	putative LRR receptor-like serine/threonine-protein kinase	AT1G74360	AT1G74360	1×g-PCB	µ×g-PCB	162.743	986.203	6.05987	2.59929	0.04173
252377_at	glucosinolate transporter 1	AT3G47960	AT3G47960	1×g-PCB	µ×g-PCB	1456.31	8822.45	6.0581	2.59887	0.00240191
249384_at	hypothetical protein	AT5G39890	AT5G39890	1×g-PCB	µ×g-PCB	39.1719	237.034	6.05112	2.5972	0.0262667
267496_at	phospholipase A1-Igamma2	AT2G30550	AT2G30550	1×g-PCB	µ×g-PCB	333.522	2015.1	6.04189	2.595	0.0214707
246097_at	HHP1 (HEPTAHELICAL TRANSMEMBRANE PROTEIN1); receptor	HHP1	AT5G20270	1×g-PCB	µ×g-PCB	251.527	1519.33	6.04042	2.59465	0.027342
248337_at	LTI78 (LOW-TEMPERATURE-INDUCED 78)	LTI78	AT5G52310	1×g-PCB	µ×g-PCB	2786.06	16809.4	6.0334	2.59297	0.00216268
261728_at	sks5 (SKU5 Similar 5); copper ion binding / oxidoreductase	sks5	AT1G76160	1×g-PCB	µ×g-PCB	674.737	4064.27	6.02349	2.5906	0.00978111
254380_at	hypothetical protein	AT4G21865	AT4G21865	1×g-PCB	µ×g-PCB	81.9798	493.443	6.01908	2.58954	0.00555334
258830_at	PPPDE putative thiol peptidase family protein	AT3G07090	AT3G07090	1×g-PCB	µ×g-PCB	1035.95	6233.59	6.01724	2.5891	0.000961731
261981_at	GDSL esterase/lipase	AT1G33811	AT1G33811	1×g-PCB	µ×g-PCB	37.3225	223.883	5.99861	2.58463	0.0193118
248232_at	MLO11 (MILDEW RESISTANCE LOCUS O 11); calmodulin binding	MLO11	AT5G53760	1×g-PCB	µ×g-PCB	57.6612	345.632	5.99419	2.58356	0.0162631
247541_at	glycine-rich protein	AT5G61660	AT5G61660	1×g-PCB	µ×g-PCB	260.467	1560.42	5.99085	2.58276	0.0338769
265939_at	cysteine/histidine-rich C1 domain-containing protein	AT2G19650	AT2G19650	1×g-PCB	µ×g-PCB	102.502	611.548	5.9662	2.57681	0.00125602
263761_at	fructose-bisphosphate aldolase 1	FBA1	AT2G21330	1×g-PCB	µ×g-PCB	329.331	1964.31	5.96457	2.57642	0.0130592
253277_at	ATCAD5 (CINNAMYL ALCOHOL DEHYDROGENASE 5); cinnamyl-alcohol dehydrogenase	ATCAD5	AT4G34230	1×g-PCB	µ×g-PCB	1765.02	10516.7	5.9584	2.57493	0.00807418
259975_at	NAD(P)-binding Rossmann-fold superfamily protein	AT1G76470	AT1G76470	1×g-PCB	µ×g-PCB	29.5612	175.753	5.9454	2.57177	0.019552
247038_at	"EPS1 (ENHANCED PSEUDOMONAS SUSCEPTIBILTY 1); transferase/ transferase, transferring acyl groups other than amino-acyl groups"	EPS1	AT5G67160	1×g-PCB	µ×g-PCB	112.129	665.239	5.9328	2.56871	0.00227606
248582_at	CPHSC70-2EAT SHOCK PROTEIN 70-2 (CHLOROPLAST HEAT SHOCK PROTEIN 70-2); ATP binding / unfolded protein binding	CPHSC70-2EAT SHOCK PROTEIN 70-2	AT5G49910	1×g-PCB	µ×g-PCB	335.238	1984.17	5.91868	2.56528	0.00644692
256049_at	shewenella-like protein phosphatase 1	AT1G07010	AT1G07010	1×g-PCB	µ×g-PCB	116.297	687.379	5.91056	2.56329	0.00288753
267384_at	cysteine/histidine-rich C1 domain-containing protein	AT2G44370	AT2G44370	1×g-PCB	µ×g-PCB	33.3796	196.812	5.8962	2.55978	0.0452446
262414_at	LACS2 (LONG-CHAIN ACYL-COA SYNTHETASE 2); long-chain-fatty-acid-CoA ligase	LACS2	AT1G49430	1×g-PCB	µ×g-PCB	42.7419	251.784	5.89079	2.55846	0.0218911
248476_at	lipase domain-containing protein	AT5G50890	AT5G50890	1×g-PCB	µ×g-PCB	59.4213	349.975	5.88972	2.5582	0.00229095
266455_at	transcription factor bHLH19	AT2G22760	AT2G22760	1×g-PCB	µ×g-PCB	458.703	2692.27	5.86932	2.55319	0.0461204
247327_at	peroxidase 71	AT5G64120	AT5G64120	1×g-PCB	µ×g-PCB	734.455	4304.68	5.86105	2.55116	0.036542
254289_at	hypothetical protein	AT4G22980	AT4G22980	1×g-PCB	µ×g-PCB	103.229	605.026	5.86102	2.55115	0.00329118
252102_at	LTI30 (LOW TEMPERATURE-INDUCED 30)	LTI30	AT3G50970	1×g-PCB	µ×g-PCB	1835.5	10749	5.85619	2.54996	0.0241744
244904_at	hypothetical protein	ArthMp060	ATMG00670	1×g-PCB	µ×g-PCB	26.4677	154.828	5.84968	2.54836	0.0190819
251895_at	ATEP3; chitinase	ATEP3	AT3G54420	1×g-PCB	µ×g-PCB	218.051	1274.17	5.84344	2.54682	0.0386487
262756_at	OCT6 (ORGANIC CATION/CARNITINE TRANSPORTER 6); carbohydrate transmembrane transporter/ sugar:hydrogen symporter	OCT6	AT1G16370	1×g-PCB	µ×g-PCB	875.912	5111.66	5.83581	2.54493	0.0312303
264802_at	SYP111 (SYNTAXIN OF PLANTS 111); SNAP receptor	SYP111	AT1G08560	1×g-PCB	µ×g-PCB	45.9118	266.359	5.80154	2.53644	0.0198802
261481_at	RING-variant domain-containing protein	AT1G14260	AT1G14260	1×g-PCB	µ×g-PCB	108.084	626.365	5.79515	2.53485	0.024216
263134_at	"RHM1 (RHAMNOSE BIOSYNTHESIS 1); UDP-L-rhamnose synthase/ UDP-glucose 4,6-dehydratase/ catalytic"	RHM1	AT1G78570	1×g-PCB	µ×g-PCB	321.248	1861.51	5.79463	2.53472	0.000977035
252661_at	hypothetical protein	AT3G44450	AT3G44450	1×g-PCB	µ×g-PCB	9.03714	52.2917	5.78631	2.53264	0.0128366
256627_at	hypothetical protein	AT3G19970	AT3G19970	1×g-PCB	µ×g-PCB	457.488	2636.34	5.76263	2.52673	0.00725309
251028_at	haloacid dehalogenase-like hydrolase superfamily protein	AT5G02230	AT5G02230	1×g-PCB	µ×g-PCB	329.676	1897.1	5.75443	2.52467	0.0386359
262151_at	putative hydrolase	AT1G52510	AT1G52510	1×g-PCB	µ×g-PCB	21.493	123.667	5.75384	2.52452	0.0252135
260028_at	hypothetical protein	AT1G29980	AT1G29980	1×g-PCB	µ×g-PCB	173.512	994.459	5.73137	2.51888	0.0402071
258315_at	thioesterase family protein	AT3G16175	AT3G16175	1×g-PCB	µ×g-PCB	23.5177	134.65	5.72547	2.51739	0.00454831
254416_at	ARK3 (A. THALIANA RECEPTOR KINASE 3); kinase/ transmembrane receptor protein serine/threonine kinase	ARK3	AT4G21380	1×g-PCB	µ×g-PCB	52.8551	302.265	5.71874	2.5157	0.0340593
246485_at	AtCXE17 (Arabidopsis thaliana carboxyesterase 17); hydrolase	AtCXE17	AT5G16080	1×g-PCB	µ×g-PCB	110.653	632.162	5.713	2.51425	0.0261964
251847_at	TSA1 (TRYPTOPHAN SYNTHASE ALPHA CHAIN); tryptophan synthase	TSA1	AT3G54640	1×g-PCB	µ×g-PCB	453.191	2588.72	5.7122	2.51405	0.00889791
254265_s_at	CRK6 (CYSTEINE-RICH RLK 6); kinase	CRK6	AT4G23140 /// AT4G23160	1×g-PCB	µ×g-PCB	190.736	1088.72	5.70801	2.51299	0.0348652
253101_at	CYP91A2 (CYTOCHROME P450 MONOOXYGENASE 91A2); electron carrier/ heme binding / iron ion binding / monooxygenase/ oxygen binding	CYP91A2	AT4G37430	1×g-PCB	µ×g-PCB	61.0402	347.847	5.69865	2.51062	0.0254355
263378_at	ATHPP2C5; catalytic/ protein serine/threonine phosphatase	ATHPP2C5	AT2G40180	1×g-PCB	µ×g-PCB	31.6835	180.281	5.69005	2.50844	0.014519
256415_at	GDSL esterase/lipase	AT3G11210	AT3G11210	1×g-PCB	µ×g-PCB	52.3207	297.54	5.68685	2.50763	0.0341099
245346_at	CT-BMY (CHLOROPLAST BETA-AMYLASE); beta-amylase	CT-BMY	AT4G17090	1×g-PCB	µ×g-PCB	1752.84	9936.09	5.66856	2.50298	0.000222797
260666_at	"PARVUS (PARVUS); polygalacturonate 4-alpha-galacturonosyltransferase/ transferase, transferring glycosyl groups / transferase, transferring hexosyl groups"	PARVUS	AT1G19300	1×g-PCB	µ×g-PCB	150.297	850.029	5.65564	2.49969	0.0113504
246516_at	O-fucosyltransferase family protein	AT5G15740	AT5G15740	1×g-PCB	µ×g-PCB	31.1297	175.972	5.65285	2.49898	0.045154
258040_at	O-fucosyltransferase family protein	AT3G21190	AT3G21190	1×g-PCB	µ×g-PCB	104.388	589.768	5.64976	2.49819	0.0265455
258259_s_at	Esterase/lipase/thioesterase family protein /// phytyl ester synthesis and diacylglycerol acyltransferase activity protein	AT3G26820 /// AT3G26840	AT3G26820 /// AT3G26840	1×g-PCB	µ×g-PCB	144.801	817.912	5.64851	2.49787	0.0113647
266671_at	ASA2 (ANTHRANILATE SYNTHASE 2); anthranilate synthase	ASA2	AT2G29690	1×g-PCB	µ×g-PCB	32.0775	180.794	5.63616	2.49471	0.00160166
255619_s_at	ULI3; diacylglycerol binding / heme binding	ULI3	AT4G01350 /// AT5G59920	1×g-PCB	µ×g-PCB	211.491	1188.34	5.61887	2.49028	0.01161
249752_at	LSU2 (RESPONSE TO LOW SULFUR 2)	LSU2	AT5G24660	1×g-PCB	µ×g-PCB	59.649	334.955	5.61544	2.4894	0.0218067
262939_s_at	GAPCP-2; NAD or NADH binding / binding / catalytic/ glyceraldehyde-3-phosphate dehydrogenase (phosphorylating)/ glyceraldehyde-3-phosphate dehydrogenase	GAPCP-2	AT1G16300 /// AT1G79530	1×g-PCB	µ×g-PCB	53.5672	300.062	5.6016	2.48584	0.00474915
245363_at	VQ motif-containing protein	AT4G15120	AT4G15120	1×g-PCB	µ×g-PCB	78.4639	435.554	5.55101	2.47275	0.00926504
246214_at	HSF4 (HEAT SHOCK FACTOR 4); DNA binding / transcription factor/ transcription repressor	HSF4	AT4G36988 /// AT4G36990	1×g-PCB	µ×g-PCB	506.298	2803.23	5.53671	2.46903	0.0293948
259018_at	AIR12; extracellular matrix structural constituent	AIR12	AT3G07390	1×g-PCB	µ×g-PCB	694.484	3837.52	5.52572	2.46616	0.00529008
254321_at	CPuORF27 (Conserved peptide upstream open reading frame 27)	CPuORF27	AT4G22590 /// AT4G22592	1×g-PCB	µ×g-PCB	533.82	2947.82	5.52212	2.46522	0.000541049
259568_at	4-coumarate--CoA ligase-like 3	AT1G20490	AT1G20490	1×g-PCB	µ×g-PCB	11.6136	64.1257	5.52159	2.46508	0.00390005
251370_at	phosphoglycerate mutase family protein	AT3G60450	AT3G60450	1×g-PCB	µ×g-PCB	194.573	1071.73	5.50812	2.46156	0.00229185
257822_at	ROF1 (ROTAMASE FKBP 1); FK506 binding / calmodulin binding / peptidyl-prolyl cis-trans isomerase	ROF1	AT3G25230	1×g-PCB	µ×g-PCB	342.378	1880.83	5.49344	2.45771	0.000583527
259611_at	AtRABG3d (Arabidopsis Rab GTPase homolog G3d); GTP binding	AtRABG3d	AT1G52280	1×g-PCB	µ×g-PCB	289.646	1590.8	5.49224	2.45739	0.00234257
245524_at	bidirectional sugar transporter SWEET17	AT4G15920	AT4G15920	1×g-PCB	µ×g-PCB	76.3898	419.238	5.48814	2.45632	0.0364423
246481_s_at	KIN1	KIN1	AT5G15960 /// AT5G15970	1×g-PCB	µ×g-PCB	5587.41	30636.9	5.4832	2.45502	0.000589933
264442_at	Lecithin-cholesterol acyltransferase-like 1	AT1G27480	AT1G27480	1×g-PCB	µ×g-PCB	40.8381	223.843	5.48121	2.4545	0.0284645
261569_at	LHY (LATE ELONGATED HYPOCOTYL); DNA binding / transcription factor	LHY	AT1G01060	1×g-PCB	µ×g-PCB	664.864	3642.32	5.47829	2.45373	0.000237015
249596_s_at	UDP-glycosyltransferase-like protein /// UDP-glycosyltransferase 76E9	AT5G37950 /// AT5G38010	AT5G37950 /// AT5G38010	1×g-PCB	µ×g-PCB	21.9779	120.153	5.46701	2.45075	0.0243062
263320_at	"AtGolS1 (Arabidopsis thaliana galactinol synthase 1); transferase, transferring glycosyl groups / transferase, transferring hexosyl groups"	AtGolS1	AT2G47180	1×g-PCB	µ×g-PCB	1693.74	9257.25	5.46558	2.45037	0.00809647
258633_at	SCPL27 (serine carboxypeptidase-like 27); serine-type carboxypeptidase	SCPL27	AT3G07990	1×g-PCB	µ×g-PCB	50.1111	273.837	5.4646	2.45012	0.0225994
246126_at	ATNUDX19 (ARABIDOPSIS THALIANA NUDIX HYDROLASE HOMOLOG 19); hydrolase/ metal ion binding	ATNUDX19	AT5G20070	1×g-PCB	µ×g-PCB	328.783	1793.54	5.45508	2.4476	0.00114522
258002_at	AIG2 (AVRRPT2-INDUCED GENE 2)	AIG2	AT3G28930	1×g-PCB	µ×g-PCB	211.045	1149.02	5.44444	2.44478	0.00187672
250455_at	PROPEP4 (Elicitor peptide 4 precursor)	PROPEP4	AT5G09980	1×g-PCB	µ×g-PCB	37.6791	204.672	5.43197	2.44148	0.0328666
261826_at	PMEPCRA (METHYLESTERASE PCR A); enzyme inhibitor/ pectinesterase	PMEPCRA	AT1G11580	1×g-PCB	µ×g-PCB	151.102	820.722	5.43157	2.44137	0.0024721
246125_at	hypothetical protein	AT5G19875	AT5G19875	1×g-PCB	µ×g-PCB	231.479	1256.18	5.42677	2.44009	0.0105862
249046_at	FAD-binding and BBE domain-containing protein	AT5G44400	AT5G44400	1×g-PCB	µ×g-PCB	198.368	1075.46	5.42155	2.43871	0.0219826
264157_at	"XTH17 (XYLOGLUCAN ENDOTRANSGLUCOSYLASE/HYDROLASE 17); hydrolase, acting on glycosyl bonds / hydrolase, hydrolyzing O-glycosyl compounds / xyloglucan:xyloglucosyl transferase"	XTH17	AT1G65310	1×g-PCB	µ×g-PCB	88.8446	479.912	5.4017	2.43341	0.0348333
254408_at	B120; ATP binding / protein kinase/ protein serine/threonine kinase/ sugar binding	B120	AT4G21390	1×g-PCB	µ×g-PCB	276.468	1491.6	5.39518	2.43167	0.0190349
265842_at	ERF38 (ERF FAMILY PROTEIN 38); DNA binding / transcription factor	ERF38	AT2G35700	1×g-PCB	µ×g-PCB	31.5581	170.243	5.39461	2.43152	0.00264085
259102_at	NHL1	NHL1	AT3G11660	1×g-PCB	µ×g-PCB	260.009	1401.68	5.39088	2.43052	0.0123069
247498_at	ATP-Mg/Pi transporter	AT5G61810	AT5G61810	1×g-PCB	µ×g-PCB	308.952	1656.71	5.36235	2.42287	0.00338594
264717_at	ATFH8 (formin 8); actin binding / actin filament binding / profilin binding	ATFH8	AT1G70140	1×g-PCB	µ×g-PCB	377.007	2013.53	5.34083	2.41706	0.00482814
247104_at	DAR6 (DA1-RELATED PROTEIN 6); zinc ion binding	DAR6	AT5G66620	1×g-PCB	µ×g-PCB	93.0638	495.391	5.32314	2.41228	0.0173867
262526_at	SPS2 (Solanesyl diphosphate synthase 2); trans-octaprenyltranstransferase	SPS2	AT1G17050	1×g-PCB	µ×g-PCB	140.197	746.232	5.32273	2.41217	0.000546505
253131_at	WOX13 (WUSCHEL-RELATED HOMEOBOX 13); DNA binding / transcription factor	WOX13	AT4G35550	1×g-PCB	µ×g-PCB	98.0175	521.191	5.31732	2.4107	0.00884171
259550_at	AGP5 (ARABINOGALACTAN-PROTEIN 5)	AGP5	AT1G35230	1×g-PCB	µ×g-PCB	311.926	1655.58	5.3076	2.40806	0.0389607
257262_at	B-box type zinc finger-containing protein	AT3G21890	AT3G21890	1×g-PCB	µ×g-PCB	67.8772	360.01	5.30383	2.40704	0.030236
245052_at	Probable pectinesterase/pectinesterase inhibitor 12	AT2G26440	AT2G26440	1×g-PCB	µ×g-PCB	68.2147	361.793	5.30375	2.40701	0.0152499
254505_at	GCN5-related N-acetyltransferase (GNAT) family protein	AT4G19985	AT4G19985	1×g-PCB	µ×g-PCB	27.4756	145.413	5.29243	2.40393	0.0278854
248537_at	putative thiol-disulfide oxidoreductase DCC	AT5G50100	AT5G50100	1×g-PCB	µ×g-PCB	97.9355	518.306	5.29231	2.4039	0.00402076
259925_at	PR5 (PATHOGENESIS-RELATED GENE 5)	PR5	AT1G75040	1×g-PCB	µ×g-PCB	153.432	811.288	5.2876	2.40261	0.0437
255552_at	SAM-2 (S-ADENOSYLMETHIONINE SYNTHETASE 2); copper ion binding / methionine adenosyltransferase	SAM-2	AT4G01850	1×g-PCB	µ×g-PCB	2227.7	11759.6	5.27881	2.40021	0.00209095
262933_at	ATPAO4 (ARABIDOPSIS THALIANA POLYAMINE OXIDASE 4); amine oxidase/ polyamine oxidase	ATPAO4	AT1G65840	1×g-PCB	µ×g-PCB	233.86	1233.66	5.27521	2.39923	0.00117753
247704_at	RTFL5 (ROTUNDIFOLIA LIKE 5)	RTFL5	AT5G59510	1×g-PCB	µ×g-PCB	164.768	867.499	5.26497	2.39643	0.0374084
254809_at	SAUR-like auxin-responsive protein	AT4G12410	AT4G12410	1×g-PCB	µ×g-PCB	164.451	863.142	5.24862	2.39194	0.0318238
261788_at	NDF1 (NDH-DEPENDENT CYCLIC ELECTRON FLOW 1)	NDF1	AT1G15980	1×g-PCB	µ×g-PCB	33.9866	178.368	5.24819	2.39182	0.0277587
262671_at	CPK29; ATP binding / calcium ion binding / calmodulin-dependent protein kinase/ kinase/ protein kinase	CPK29	AT1G76040	1×g-PCB	µ×g-PCB	303.721	1592.51	5.24334	2.39049	0.00450072
265062_at	G-type lectin S-receptor-like serine/threonine-protein kinase	AT1G61550	AT1G61550	1×g-PCB	µ×g-PCB	29.2027	153.097	5.24257	2.39027	0.0310622
253629_at	glycine-rich protein	AT4G30450	AT4G30450	1×g-PCB	µ×g-PCB	131.58	684.81	5.20452	2.37977	0.00798415
264626_at	AS2 (ASYMMETRIC LEAVES 2); protein binding	AS2	AT1G65620	1×g-PCB	µ×g-PCB	15.3063	79.543	5.19675	2.37761	0.00235713
265359_at	MYB7 (MYB DOMAIN PROTEIN 7); DNA binding / transcription factor	MYB7	AT2G16720	1×g-PCB	µ×g-PCB	676.325	3492.5	5.16393	2.36847	0.0032042
253922_at	VTC2 (vitamin c defective 2); GDP-D-glucose phosphorylase/ GDP-galactose:glucose-1-phosphate guanyltransferase/ GDP-galactose:mannose-1-phosphate guanyltransferase/ GDP-galactose:myoinositol-1-phosphate guanyltransferase/ galactose-1-phosphate guanylyltra	VTC2	AT4G26850	1×g-PCB	µ×g-PCB	1475.6	7614.11	5.16001	2.36737	0.00472727
249138_at	WPP1 (WPP domain protein 1)	WPP1	AT5G43070	1×g-PCB	µ×g-PCB	47.9075	246.901	5.15371	2.36561	0.0149153
266108_at	putative peptide/nitrate transporter	AT2G37900	AT2G37900	1×g-PCB	µ×g-PCB	49.8825	256.119	5.13443	2.36021	0.0314434
252736_at	TES (TETRASPORE); microtubule motor	TES	AT3G43210	1×g-PCB	µ×g-PCB	33.9101	173.788	5.12495	2.35754	0.0104181
263504_s_at	hypothetical protein	ArthMp082	AT2G07677 /// ATMG00940	1×g-PCB	µ×g-PCB	11.1503	57.0067	5.11257	2.35405	0.0476649
263252_at	STH; protein domain specific binding / transcription factor/ zinc ion binding	STH	AT2G31380	1×g-PCB	µ×g-PCB	212.159	1083.97	5.10923	2.35311	0.0266405
245612_at	HCD1 (3-HYDROXYACYL-COA DEHYDRATASE 1); carnitine racemase/ catalytic/ dodecenoyl-CoA delta-isomerase	HCD1	AT4G14440	1×g-PCB	µ×g-PCB	210.656	1069.99	5.07931	2.34463	0.0323614
266456_at	NAI1; DNA binding / transcription factor	NAI1	AT2G22770	1×g-PCB	µ×g-PCB	65.857	334.484	5.07894	2.34453	0.00323856
255690_at	CYP86A2 (CYTOCHROME P450 86 A2); fatty acid (omega-1)-hydroxylase/ oxygen binding	CYP86A2	AT4G00360	1×g-PCB	µ×g-PCB	709.45	3602.33	5.07763	2.34416	0.0490254
257890_s_at	peroxidase 29 /// peroxidase family protein	AT3G17070 /// AT3G42570	AT3G17070 /// AT3G42570	1×g-PCB	µ×g-PCB	21.9229	111.225	5.07347	2.34297	0.0408198
264692_at	myb-like transcription factor	AT1G70000	AT1G70000	1×g-PCB	µ×g-PCB	157.951	801.263	5.07286	2.3428	0.00393084
245251_at	CBL1 (CALCINEURIN B-LIKE PROTEIN 1); calcium ion binding	CBL1	AT4G17615	1×g-PCB	µ×g-PCB	1425.95	7211.5	5.05731	2.33837	0.00735524
252482_at	"UGT76E11 (UDP-GLUCOSYL TRANSFERASE 76E11); UDP-glycosyltransferase/ quercetin 3-O-glucosyltransferase/ quercetin 7-O-glucosyltransferase/ transferase, transferring glycosyl groups"	UGT76E11	AT3G46670	1×g-PCB	µ×g-PCB	30.9512	156.184	5.04613	2.33518	0.00951021
258287_at	SULTR3;4 (SULFATE TRANSPORTER 3;4); sulfate transmembrane transporter	SULTR3;4	AT3G15990	1×g-PCB	µ×g-PCB	82.8964	417.018	5.03059	2.33073	0.0295114
260985_at	"MUM4 (MUCILAGE-MODIFIED 4); UDP-4-keto-6-deoxy-glucose-3,5-epimerase/ UDP-4-keto-rhamnose-4-keto-reductase/ UDP-L-rhamnose synthase/ UDP-glucose 4,6-dehydratase/ catalytic"	MUM4	AT1G53500	1×g-PCB	µ×g-PCB	238.584	1198.77	5.02453	2.32899	0.004447
254041_at	hypothetical protein	AT4G25830	AT4G25830	1×g-PCB	µ×g-PCB	107.893	540.711	5.01155	2.32526	0.0305286
257644_at	AOC3 (ALLENE OXIDE CYCLASE 3); allene-oxide cyclase	AOC3	AT3G25780	1×g-PCB	µ×g-PCB	2945.02	14735.8	5.00364	2.32298	0.00259267
250793_at	"oxidoreductase, 2OG-Fe(II) oxygenase family protein"	AT5G05600	AT5G05600	1×g-PCB	µ×g-PCB	2312.56	11566.6	5.00165	2.3224	0.00130386
257339_s_at	hypothetical protein /// ATP synthase subunit C family protein /// ATPase subunit 9	ArthMp004 /// AT2G07671 /// atp9	AT2G07671 /// ATMG00040 /// ATMG01080	1×g-PCB	µ×g-PCB	474.592	2370.39	4.99459	2.32037	0.00612221
245244_at	ILL6; IAA-amino acid conjugate hydrolase/ metallopeptidase	ILL6	AT1G44350	1×g-PCB	µ×g-PCB	1850.11	9238.34	4.99341	2.32002	0.00124761
263980_at	Peroxisomal membrane 22 kDa (Mpv17/PMP22) family protein	AT2G42770	AT2G42770	1×g-PCB	µ×g-PCB	86.7681	432.773	4.9877	2.31837	0.0132135
258201_at	hypothetical protein	AT3G13910	AT3G13910	1×g-PCB	µ×g-PCB	406.473	2024.11	4.97968	2.31605	0.00721934
252827_at	CYP79B2; electron carrier/ heme binding / iron ion binding / monooxygenase/ oxygen binding	CYP79B2	AT4G39950	1×g-PCB	µ×g-PCB	243.877	1211.81	4.96893	2.31294	0.00407861
263722_at	GONST1 (Golgi Nucleotide Sugar Transporter 1); GDP-mannose transmembrane transporter/ nucleotide-sugar transmembrane transporter	GONST1	AT2G13650	1×g-PCB	µ×g-PCB	501.92	2488.2	4.95737	2.30957	0.00513838
265119_at	FMO GS-OX4 (FLAVIN-MONOOXYGENASE GLUCOSINOLATE S-OXYGENASE 4); 4-methylthiopropyl glucosinolate S-oxygenase/ 8-methylthiopropyl glucosinolate S-oxygenase/ flavin-containing monooxygenase/ monooxygenase	FMO GS-OX4	AT1G62570	1×g-PCB	µ×g-PCB	57.6597	285.382	4.94942	2.30726	0.0014657
247776_at	phosphoinositide-specific phospholipase C family protein	PLC4	AT5G58700	1×g-PCB	µ×g-PCB	71.9599	355.807	4.94452	2.30583	0.0108666
246627_s_at	putative 5-enolpyruvylshikimate-3-phosphate synthase /// 3-phosphoshikimate 1-carboxyvinyltransferase / 5-enolpyruvylshikimate-3-phosphate / EPSP synthase	AT1G48860 /// AT2G45300	AT1G48860 /// AT2G45300	1×g-PCB	µ×g-PCB	798.869	3948.51	4.94263	2.30528	0.00638693
266421_at	LP1; calmodulin binding	LP1	AT2G38540	1×g-PCB	µ×g-PCB	2040.45	10080	4.94009	2.30454	0.0122084
262226_at	hypothetical protein /// hypothetical protein	AT1G53885 /// AT1G53903	AT1G53885 /// AT1G53903	1×g-PCB	µ×g-PCB	551.875	2712.37	4.91483	2.29714	0.0218204
266993_at	major facilitator protein	AT2G39210	AT2G39210	1×g-PCB	µ×g-PCB	1089.87	5352.45	4.91109	2.29604	2.8051e-05
251796_at	very-long-chain enoyl-CoA reductase	CER10	AT3G55360	1×g-PCB	µ×g-PCB	312.719	1535.69	4.91077	2.29595	0.0269886
248139_at	hypothetical protein	AT5G54970	AT5G54970	1×g-PCB	µ×g-PCB	62.3598	305.074	4.89216	2.29047	0.0107224
266737_at	short-chain dehydrogenase reductase 5	AT2G47140	AT2G47140	1×g-PCB	µ×g-PCB	77.9899	381.172	4.88745	2.28908	0.0272018
248330_at	NAD(P)-binding Rossmann-fold superfamily protein	AT5G52810	AT5G52810	1×g-PCB	µ×g-PCB	44.2773	215.696	4.87148	2.28436	0.0221848
256057_at	NDA1 (ALTERNATIVE NAD(P)H DEHYDROGENASE 1); NADH dehydrogenase	NDA1	AT1G07180	1×g-PCB	µ×g-PCB	78.113	379.367	4.85664	2.27996	0.0393376
266167_at	YLS5	YLS5	AT2G38860	1×g-PCB	µ×g-PCB	334.992	1625	4.85087	2.27824	0.013473
250669_at	PGIP2 (POLYGALACTURONASE INHIBITING PROTEIN 2); protein binding	PGIP2	AT5G06870	1×g-PCB	µ×g-PCB	719.682	3480.78	4.83655	2.27398	0.0243338
265897_at	MOT1 (molybdate transporter 1); molybdate ion transmembrane transporter/ sulfate transmembrane transporter	MOT1	AT2G25680	1×g-PCB	µ×g-PCB	31.6394	153.013	4.83615	2.27386	0.0166403
254232_at	CORI3 (CORONATINE INDUCED 1); cystathionine beta-lyase/ transaminase	CORI3	AT4G23600	1×g-PCB	µ×g-PCB	581.998	2814.41	4.83577	2.27375	0.0495307
249010_at	hypothetical protein	AT5G44580	AT5G44580	1×g-PCB	µ×g-PCB	1628.06	7848.11	4.82054	2.26919	0.00925337
256386_at	cytochrome P450 superfamily protein	AT1G66540	AT1G66540	1×g-PCB	µ×g-PCB	30.8625	148.254	4.80367	2.26414	0.0299091
252134_at	hypothetical protein	AT3G50910	AT3G50910	1×g-PCB	µ×g-PCB	705.636	3384.43	4.79629	2.26192	0.00800016
253654_at	"core-2/I-branching beta-1,6-N-acetylglucosaminyltransferase family protein"	AT4G30060	AT4G30060	1×g-PCB	µ×g-PCB	97.1628	465.269	4.78855	2.25959	0.000136965
261247_at	hypothetical protein	AT1G20070	AT1G20070	1×g-PCB	µ×g-PCB	62.7428	300.435	4.78835	2.25953	0.01531
260205_at	TIFY7	TIFY7	AT1G70700	1×g-PCB	µ×g-PCB	1756.27	8408.79	4.78786	2.25938	0.00387591
246282_at	AAA-type ATPase family protein	AT4G36580	AT4G36580	1×g-PCB	µ×g-PCB	20.3499	97.3898	4.78577	2.25875	0.0119774
246310_at	SULTR3;1 (SULFATE TRANSPORTER 3;1); secondary active sulfate transmembrane transporter/ sulfate transmembrane transporter/ transporter	SULTR3;1	AT3G51895	1×g-PCB	µ×g-PCB	318.263	1522.38	4.78342	2.25804	0.0280098
245060_at	CYT1 (CYTOKINESIS DEFECTIVE 1); mannose-1-phosphate guanylyltransferase/ nucleotidyltransferase	CYT1	AT2G39770	1×g-PCB	µ×g-PCB	2068.19	9881.89	4.77804	2.25642	0.00659453
256983_at	TCP-1/cpn60 chaperonin family protein	AT3G13470	AT3G13470	1×g-PCB	µ×g-PCB	145.043	692.452	4.77411	2.25523	0.0201748
263410_at	hypothetical protein	AT2G04039	AT2G04039	1×g-PCB	µ×g-PCB	53.6858	255.94	4.76736	2.25319	0.0272672
266930_at	hypothetical protein	AT2G45930	AT2G45930	1×g-PCB	µ×g-PCB	35.505	169.056	4.76147	2.25141	0.0230224
258651_at	PIP5K9 (PHOSPHATIDYL INOSITOL MONOPHOSPHATE 5 KINASE); 1-phosphatidylinositol-4-phosphate 5-kinase/ ATP binding / phosphatidylinositol phosphate kinase	PIP5K9	AT3G09920	1×g-PCB	µ×g-PCB	257.235	1220.73	4.74556	2.24658	0.00785681
260387_at	SOT16 (SULFOTRANSFERASE 16); desulfoglucosinolate sulfotransferase/ sulfotransferase	SOT16	AT1G74100	1×g-PCB	µ×g-PCB	1857.84	8809.34	4.74171	2.24541	0.00318501
254163_s_at	phosphorylase family protein /// phosphorylase family protein	AT4G24340 /// AT4G24350	AT4G24340 /// AT4G24350	1×g-PCB	µ×g-PCB	46.9301	222.398	4.73891	2.24456	0.0420668
267344_at	hypothetical protein	AT2G44230	AT2G44230	1×g-PCB	µ×g-PCB	138.217	654.421	4.73475	2.24329	0.0398541
248201_at	PTAC15 (PLASTID TRANSCRIPTIONALLY ACTIVE15)	PTAC15	AT5G54180	1×g-PCB	µ×g-PCB	73.2341	346.653	4.73349	2.2429	0.00729691
258979_at	heat shock protein 70-3	AT3G09440	AT3G09440	1×g-PCB	µ×g-PCB	2883.32	13644.1	4.73208	2.24247	0.000181183
264321_at	hypothetical protein	AT1G04200	AT1G04200	1×g-PCB	µ×g-PCB	167.973	794.049	4.72724	2.241	0.00238086
267472_at	ARPN (PLANTACYANIN); copper ion binding / electron carrier	ARPN	AT2G02850	1×g-PCB	µ×g-PCB	83.9027	395.784	4.71718	2.23792	0.0349145
251961_at	AtPPa4 (Arabidopsis thaliana pyrophosphorylase 4); inorganic diphosphatase	AtPPa4	AT3G53620	1×g-PCB	µ×g-PCB	346.629	1632.92	4.71085	2.23599	0.0140379
246021_at	L-ascorbate oxidase	AT5G21100	AT5G21100	1×g-PCB	µ×g-PCB	48.2319	227.198	4.71053	2.23589	0.00889791
259134_at	hypothetical protein	AT3G05390	AT3G05390	1×g-PCB	µ×g-PCB	42.326	199.362	4.71015	2.23577	0.0353026
256745_at	putative UDP-glucose 6-dehydrogenase 1	AT3G29360	AT3G29360	1×g-PCB	µ×g-PCB	1254	5895.09	4.70102	2.23298	0.00324494
259592_at	LTPG1 (GLYCOSYLPHOSPHATIDYLINOSITOL-ANCHORED LIPID PROTEIN TRANSFER 1)	LTPG1	AT1G27950	1×g-PCB	µ×g-PCB	1160.47	5446.23	4.69312	2.23055	0.0289874
250161_at	transmembrane amino acid transporter family protein	AT5G15240	AT5G15240	1×g-PCB	µ×g-PCB	188.221	882.76	4.69003	2.2296	0.0328186
252291_s_at	PRXCB (PEROXIDASE CB); peroxidase	PRXCB	AT3G49110 /// AT3G49120	1×g-PCB	µ×g-PCB	2647.94	12412.5	4.6876	2.22885	0.00815188
258607_at	TRXF1 (THIOREDOXIN F-TYPE 1); enzyme activator	TRXF1	AT3G02730	1×g-PCB	µ×g-PCB	197.599	925.026	4.68133	2.22692	0.0102213
266225_at	ATOEP16-1 (OUTER PLASTID ENVELOPE PROTEIN 16-1); P-P-bond-hydrolysis-driven protein transmembrane transporter/ protein transporter	ATOEP16-1	AT2G28900	1×g-PCB	µ×g-PCB	1128.88	5282.67	4.67958	2.22638	0.00198983
263382_at	putative CoA-dependent acyltransferase	AT2G40230	AT2G40230	1×g-PCB	µ×g-PCB	61.3821	286.942	4.67468	2.22487	0.00761748
247400_at	phosphoglycerate mutase family protein	AT5G62840	AT5G62840	1×g-PCB	µ×g-PCB	24.9144	116.368	4.67073	2.22365	0.0107736
256431_s_at	AtRLP34 (Receptor Like Protein 34); kinase/ protein binding	AtRLP34	AT3G11010 /// AT5G27060	1×g-PCB	µ×g-PCB	109.391	510.237	4.66434	2.22167	0.000485877
261175_at	glycine-rich protein	AT1G04800	AT1G04800	1×g-PCB	µ×g-PCB	36.9435	172.007	4.65595	2.21908	0.019989
261420_at	"KCS3 (3-KETOACYL-COA SYNTHASE 3); acyltransferase/ catalytic/ transferase, transferring acyl groups other than amino-acyl groups"	KCS3	AT1G07720	1×g-PCB	µ×g-PCB	315.33	1467.4	4.65354	2.21833	0.015883
261651_at	interferon-related developmental regulator family protein / IFRD protein family	SAT32	AT1G27760	1×g-PCB	µ×g-PCB	586.149	2726.87	4.65217	2.2179	0.00248324
259642_at	BSD domain-containing protein	AT1G69030	AT1G69030	1×g-PCB	µ×g-PCB	143.441	667.208	4.65146	2.21768	0.00355868
250475_at	AST68; sulfate transmembrane transporter	SULTR2;1	AT5G10180	1×g-PCB	µ×g-PCB	311.937	1449.81	4.64775	2.21653	0.0170426
262616_at	2-oxoglutarate-dependent dioxygenase-like protein	AT1G06620	AT1G06620	1×g-PCB	µ×g-PCB	316.497	1470.93	4.64754	2.21647	0.0127752
248176_at	Fh5 (FORMIN HOMOLOGY5); actin binding	Fh5	AT5G54650	1×g-PCB	µ×g-PCB	76.8987	357.175	4.64475	2.2156	0.010379
250934_at	chaperone DnaJ-domain containing protein	AT5G03030	AT5G03030	1×g-PCB	µ×g-PCB	713.257	3312.01	4.64351	2.21522	0.00678138
258023_at	ATCAD4; cinnamyl-alcohol dehydrogenase	ATCAD4	AT3G19450	1×g-PCB	µ×g-PCB	126.157	585.419	4.64039	2.21425	0.011972
246779_at	PNC2 (PEROXISOMAL ADENINE NUCLEOTIDE CARRIER 2); ADP transmembrane transporter/ ATP transmembrane transporter/ binding	PNC2	AT5G27520	1×g-PCB	µ×g-PCB	846.588	3928.5	4.64039	2.21425	0.00439444
262181_at	putative beta-D-xylosidase 7	AT1G78060	AT1G78060	1×g-PCB	µ×g-PCB	79.2293	367.284	4.63571	2.21279	0.0275443
253104_at	pathogenesis-related thaumatin family protein	AT4G36010	AT4G36010	1×g-PCB	µ×g-PCB	1412.54	6526.94	4.62071	2.20811	0.0294417
264315_at	polygalacturonase 2	PG2	AT1G70370	1×g-PCB	µ×g-PCB	315.557	1458.07	4.62064	2.20809	0.0252377
253083_at	ALDH3F1 (Aldehyde Dehydrogenase 3F1); 3-chloroallyl aldehyde dehydrogenase/ aldehyde dehydrogenase (NAD)	ALDH3F1	AT4G36250	1×g-PCB	µ×g-PCB	340.451	1572.05	4.61756	2.20713	0.0417072
264767_at	SD1-29 (S-DOMAIN-1 29); carbohydrate binding / kinase/ protein kinase	SD1-29	AT1G61380	1×g-PCB	µ×g-PCB	175.586	806.531	4.59338	2.19956	0.00334896
248861_at	TRN2 (TORNADO 2)	TRN2	AT5G46700	1×g-PCB	µ×g-PCB	130.373	598.452	4.59031	2.19859	0.0362189
254781_at	hypothetical protein	AT4G12840	AT4G12840	1×g-PCB	µ×g-PCB	26.8385	123.145	4.58839	2.19799	0.00443127
248551_at	WR3 (WOUND-RESPONSIVE 3); nitrate transmembrane transporter	WR3	AT5G50200	1×g-PCB	µ×g-PCB	206.19	945.398	4.58509	2.19695	0.0107217
245304_at	hypothetical protein	AT4G15630	AT4G15630	1×g-PCB	µ×g-PCB	111.456	510.168	4.57731	2.1945	0.0415346
266170_at	Euonymus lectin S3	AT2G39050	AT2G39050	1×g-PCB	µ×g-PCB	163.354	747.24	4.57435	2.19357	0.0163562
248687_at	ADG1 (ADP GLUCOSE PYROPHOSPHORYLASE 1); glucose-1-phosphate adenylyltransferase	ADG1	AT5G48300	1×g-PCB	µ×g-PCB	61.1295	278.975	4.56368	2.1902	0.00540926
256865_at	GAE6 (UDP-D-GLUCURONATE 4-EPIMERASE 6); UDP-glucuronate 4-epimerase/ catalytic	GAE6	AT3G23820	1×g-PCB	µ×g-PCB	1972.84	8981.54	4.55261	2.18669	0.0119525
264252_at	ATSARA1A (ARABIDOPSIS THALIANA SECRETION-ASSOCIATED RAS SUPER FAMILY 1); GTP binding	ATSARA1A	AT1G09180	1×g-PCB	µ×g-PCB	110.995	504.586	4.54604	2.18461	0.0242062
266469_at	MYB14 (MYB DOMAIN PROTEIN 14); DNA binding / transcription factor	MYB14	AT2G31180	1×g-PCB	µ×g-PCB	12.5682	57.0822	4.5418	2.18327	0.0306089
252058_at	late embryogenesis abundant hydroxyproline-rich glycoprotein	AT3G52470	AT3G52470	1×g-PCB	µ×g-PCB	2043.29	9265.37	4.53453	2.18095	0.0100142
260410_at	nitrate transporter 1.7	NRT1.7	AT1G69870	1×g-PCB	µ×g-PCB	375.501	1702.35	4.53354	2.18064	0.0268241
264053_at	Kinase interacting (KIP1-like) family protein	AT2G22560	AT2G22560	1×g-PCB	µ×g-PCB	88.0002	398.389	4.52714	2.1786	0.0147602
260009_at	RNA recognition motif-containing protein	AT1G67950	AT1G67950	1×g-PCB	µ×g-PCB	72.2499	326.666	4.52133	2.17675	0.0245644
260546_at	ATTI2; serine-type endopeptidase inhibitor	ATTI2	AT2G43520	1×g-PCB	µ×g-PCB	435.555	1968.28	4.51902	2.17601	0.0291758
245265_at	ACD6 (ACCELERATED CELL DEATH 6); protein binding	ACD6	AT4G14400	1×g-PCB	µ×g-PCB	366.495	1652.96	4.51017	2.17318	0.0413279
248581_at	"Beta-glucosidase, GBA2 type family protein"	AT5G49900	AT5G49900	1×g-PCB	µ×g-PCB	293.054	1318.51	4.49921	2.16967	0.0137994
258719_at	pectin lyase-like superfamily protein	AT3G09540	AT3G09540	1×g-PCB	µ×g-PCB	47.966	215.656	4.49602	2.16865	0.0221885
251658_at	calcium-dependent phosphotriesterase superfamily protein	AT3G57020	AT3G57020	1×g-PCB	µ×g-PCB	167.93	753.916	4.48947	2.16654	0.0365081
247228_at	probable trehalose-phosphate phosphatase J	AT5G65140	AT5G65140	1×g-PCB	µ×g-PCB	66.9757	300.629	4.48862	2.16627	0.0233343
253824_at	mitochondrial substrate carrier family protein	MTM1	AT4G27940	1×g-PCB	µ×g-PCB	208.273	931.741	4.47365	2.16145	0.00392561
251706_at	nodulin MtN21-like transporter family protein	AT3G56620	AT3G56620	1×g-PCB	µ×g-PCB	57.6279	257.697	4.47174	2.16084	0.035856
257206_at	legume lectin-like protein	AT3G16530	AT3G16530	1×g-PCB	µ×g-PCB	1776.74	7938.48	4.46799	2.15963	0.0239686
259275_at	hypothetical protein	AT3G01060	AT3G01060	1×g-PCB	µ×g-PCB	236.367	1055.5	4.4655	2.15882	0.00142446
252511_at	protein kinase-like protein	AT3G46280	AT3G46280	1×g-PCB	µ×g-PCB	50.847	227.026	4.46488	2.15862	0.013673
267412_at	vacuolar-sorting receptor 5	VSR5	AT2G34940	1×g-PCB	µ×g-PCB	65.2228	290.952	4.46089	2.15733	0.00577159
258613_at	"VTC4; 3'(2'),5'-bisphosphate nucleotidase/ L-galactose-1-phosphate phosphatase/ inositol or phosphatidylinositol phosphatase/ inositol-1(or 4)-monophosphatase"	VTC4	AT3G02870	1×g-PCB	µ×g-PCB	55.3112	246.621	4.4588	2.15665	0.0224187
249004_at	hypothetical protein	AT5G44570	AT5G44570	1×g-PCB	µ×g-PCB	20.9691	93.4381	4.45599	2.15575	0.0384781
263180_at	URH2 (URIDINE-RIBOHYDROLASE 2); hydrolase	URH2	AT1G05620	1×g-PCB	µ×g-PCB	245.121	1091.61	4.45334	2.15489	0.0110591
251207_at	hypothetical protein	AT3G63050	AT3G63050	1×g-PCB	µ×g-PCB	63.1516	280.988	4.44942	2.15362	0.0100948
249340_at	Myosin heavy chain-related protein	AT5G41140	AT5G41140	1×g-PCB	µ×g-PCB	26.2445	116.685	4.44607	2.15253	0.0388148
246235_at	protein HOS3-1	HOS3-1	AT4G36830	1×g-PCB	µ×g-PCB	143.963	639.679	4.44336	2.15165	0.0285335
254642_at	NAD(P)-binding Rossmann-fold superfamily protein	AT4G18810	AT4G18810	1×g-PCB	µ×g-PCB	25.9434	115.227	4.44145	2.15103	0.00806479
266360_at	FRS2 (FAR1-related sequence 2); zinc ion binding	FRS2	AT2G32250	1×g-PCB	µ×g-PCB	184.508	818.922	4.4384	2.15004	0.000937615
249910_at	ADT5 (arogenate dehydratase 5); arogenate dehydratase/ prephenate dehydratase	ADT5	AT5G22630	1×g-PCB	µ×g-PCB	1474.3	6538.29	4.43484	2.14888	0.0154767
266536_at	phospholipase-like protein (PEARLI 4) family	AT2G16900	AT2G16900	1×g-PCB	µ×g-PCB	584.538	2591.74	4.43382	2.14855	0.000967924
253064_at	AtbZIP7 (Arabidopsis thaliana basic leucine-zipper 7); DNA binding / transcription factor	AtbZIP7	AT4G37730	1×g-PCB	µ×g-PCB	129.413	573.425	4.43095	2.14762	0.0111968
256168_at	leucine-rich repeat protein kinase family protein	AT1G51805	AT1G51805	1×g-PCB	µ×g-PCB	344.072	1522.66	4.42542	2.14581	0.0129715
250417_at	Nucleotide-sugar transporter family protein	AT5G11230	AT5G11230	1×g-PCB	µ×g-PCB	91.9146	406.446	4.422	2.1447	0.00747524
258108_at	alpha/beta-Hydrolases superfamily protein	AT3G23570	AT3G23570	1×g-PCB	µ×g-PCB	282.339	1248.44	4.42178	2.14463	0.0389057
250234_at	Aldolase-type TIM barrel family protein	AT5G13420	AT5G13420	1×g-PCB	µ×g-PCB	481.936	2127.41	4.4143	2.14218	0.00314805
260386_at	strictosidine synthase-like protein	AT1G74010	AT1G74010	1×g-PCB	µ×g-PCB	187.473	826.8	4.41024	2.14086	0.00820686
247214_at	hypothetical protein	AT5G64850	AT5G64850	1×g-PCB	µ×g-PCB	257.042	1133.59	4.41012	2.14082	0.00887249
261585_at	ANAC001 (Arabidopsis NAC domain containing protein 1); transcription factor	ANAC001	AT1G01010	1×g-PCB	µ×g-PCB	227.161	999.093	4.39817	2.1369	0.00556077
256076_at	hypothetical protein	AT1G18060	AT1G18060	1×g-PCB	µ×g-PCB	84.4479	371.397	4.39795	2.13683	0.0147819
248151_at	LHCB3 (LIGHT-HARVESTING CHLOROPHYLL B-BINDING PROTEIN 3); structural molecule	LHCB3	AT5G54270	1×g-PCB	µ×g-PCB	1554.81	6829.58	4.39254	2.13506	0.0345758
265452_at	ATAIB (ABA-INDUCIBLE BHLH-TYPE TRANSCRIPTION FACTOR); DNA binding / transcription factor	ATAIB	AT2G46510	1×g-PCB	µ×g-PCB	1114.48	4873.92	4.37327	2.12871	0.00740284
251020_at	ATNAP9; transporter	NAP9	AT5G02270	1×g-PCB	µ×g-PCB	403.848	1762.43	4.36409	2.12568	0.014064
266553_at	reticulon-like protein B5	AT2G46170	AT2G46170	1×g-PCB	µ×g-PCB	483.551	2109.31	4.36212	2.12503	0.00255481
256489_at	GDSL esterase/lipase	AT1G31550	AT1G31550	1×g-PCB	µ×g-PCB	152.382	663.577	4.3547	2.12257	0.0041369
250505_at	"CESA5 (CELLULOSE SYNTHASE 5); cellulose synthase/ transferase, transferring glycosyl groups"	CESA5	AT5G09870	1×g-PCB	µ×g-PCB	307.864	1338.2	4.34673	2.11993	0.00993227
257875_at	hypothetical protein	AT3G17120	AT3G17120	1×g-PCB	µ×g-PCB	156.974	678.866	4.32471	2.1126	0.0189339
249544_at	ASF1B (ANTI- SILENCING FUNCTION 1B)	ASF1B	AT5G38110	1×g-PCB	µ×g-PCB	33.7034	145.605	4.32019	2.11109	0.0100253
260506_at	cyclin family protein	CYCA3;2	AT1G47210	1×g-PCB	µ×g-PCB	39.962	172.525	4.31723	2.11011	0.00658716
266643_s_at	"UGT71D1 (UDP-GLUCOSYL TRANSFERASE 71D1); UDP-glycosyltransferase/ quercetin 3-O-glucosyltransferase/ transferase, transferring glycosyl groups"	UGT71D1	AT2G29710 /// AT2G29730	1×g-PCB	µ×g-PCB	110.809	478.013	4.31384	2.10897	0.00930418
249361_at	protein kinase family protein	AT5G40540	AT5G40540	1×g-PCB	µ×g-PCB	404.914	1745.86	4.31169	2.10825	0.000458476
264098_at	hypothetical protein	AT1G79260	AT1G79260	1×g-PCB	µ×g-PCB	105.502	454.542	4.30836	2.10714	0.0171806
259605_at	PUB45 (PLANT U-BOX 45); ubiquitin-protein ligase	PUB45	AT1G27910	1×g-PCB	µ×g-PCB	168.763	726.92	4.30735	2.1068	0.0079143
249622_at	hypothetical protein	AT5G37550	AT5G37550	1×g-PCB	µ×g-PCB	28.3285	121.963	4.3053	2.10611	0.011319
256999_at	chaperone DnaJ-domain containing protein	AT3G14200	AT3G14200	1×g-PCB	µ×g-PCB	483.236	2078.54	4.3013	2.10477	0.00556207
265008_at	MLO6 (MILDEW RESISTANCE LOCUS O 6); calmodulin binding	MLO6	AT1G61560	1×g-PCB	µ×g-PCB	397.979	1709.41	4.29523	2.10274	0.010732
264968_at	REF/SRPP-like protein	AT1G67360	AT1G67360	1×g-PCB	µ×g-PCB	938.939	4030.83	4.29296	2.10197	0.0064275
255676_at	BAM2 (BETA-AMYLASE 2); beta-amylase	BAM2	AT4G00490	1×g-PCB	µ×g-PCB	72.4096	310.738	4.29139	2.10144	0.0168903
260419_at	wall-associated receptor kinase-like 9	AT1G69730	AT1G69730	1×g-PCB	µ×g-PCB	407.822	1749.21	4.28914	2.10069	0.00461951
248486_at	RHD2 (ROOT HAIR DEFECTIVE 2); NAD(P)H oxidase	RHD2	AT5G51060	1×g-PCB	µ×g-PCB	40.4292	173.387	4.28866	2.10053	0.0171029
247794_at	PLC1 (PHOSPHOLIPASE C 1); phospholipase C	PLC1	AT5G58670	1×g-PCB	µ×g-PCB	278.622	1192.89	4.28137	2.09807	0.0278987
251793_at	regulator of chromosome condensation repeat-containing protein	AT3G55580	AT3G55580	1×g-PCB	µ×g-PCB	39.3116	167.848	4.26967	2.09412	0.00468803
263595_at	PAP8 (PURPLE ACID PHOSPHATASE 8); acid phosphatase/ protein serine/threonine phosphatase	PAP8	AT2G01890	1×g-PCB	µ×g-PCB	27.4022	116.901	4.2661	2.09292	0.0171973
251395_at	FLA8 (FASCICLIN-LIKE ARABINOGALACTAN PROTEIN 8)	FLA8	AT2G45470	1×g-PCB	µ×g-PCB	345.006	1469.46	4.25923	2.09059	0.0392247
248814_at	transcription factor jumonji (jmj) family protein / zinc finger (C5HC2 type) family protein	AT5G46910	AT5G46910	1×g-PCB	µ×g-PCB	466.842	1986.54	4.25527	2.08925	0.00893978
252324_at	protein transport protein sec61 subunit gamma-3	AT3G48570	AT3G48570	1×g-PCB	µ×g-PCB	287.753	1222.31	4.24777	2.0867	0.0116665
259403_at	PGDH (3-PHOSPHOGLYCERATE DEHYDROGENASE); phosphoglycerate dehydrogenase	PGDH	AT1G17745	1×g-PCB	µ×g-PCB	661.924	2811.25	4.24708	2.08647	0.0170609
253245_at	GBF6 (G-BOX BINDING FACTOR 6); DNA binding / protein heterodimerization/ transcription factor	GBF6	AT4G34588 /// AT4G34590	1×g-PCB	µ×g-PCB	264.696	1123.51	4.24455	2.08561	0.00456082
252952_at	glycine-rich protein	AT4G38710	AT4G38710	1×g-PCB	µ×g-PCB	333.159	1413.07	4.24143	2.08455	0.00178416
249894_at	stress responsive A/B Barrel domain-containing protein	AT5G22580	AT5G22580	1×g-PCB	µ×g-PCB	1096.7	4641.69	4.2324	2.08148	0.0496631
264386_at	pyrophosphate--fructose-6-phosphate 1-phosphotransferase subunit beta 1	AT1G12000	AT1G12000	1×g-PCB	µ×g-PCB	135.543	572.939	4.22699	2.07963	0.0240799
260134_at	MYB113 (myb domain protein 113); DNA binding / transcription factor	MYB113	AT1G66370	1×g-PCB	µ×g-PCB	95.2279	402.081	4.2223	2.07803	0.0369168
266362_at	"putative beta-1,3-galactosyltransferase 3"	AT2G32430	AT2G32430	1×g-PCB	µ×g-PCB	57.858	243.471	4.20808	2.07316	0.00755176
253405_at	ethylene-responsive transcription factor ERF043	AT4G32800	AT4G32800	1×g-PCB	µ×g-PCB	429.605	1804.33	4.19997	2.07038	0.0421452
257334_at	hypothetical protein	ArthMp110	ATMG01370	1×g-PCB	µ×g-PCB	341.821	1435.22	4.19876	2.06996	0.0144063
260903_at	pectin lyase-like superfamily protein	AT1G02460	AT1G02460	1×g-PCB	µ×g-PCB	42.3278	177.694	4.19804	2.06972	0.0039156
265182_at	alkenal/one oxidoreductase	AT1G23740	AT1G23740	1×g-PCB	µ×g-PCB	275.818	1155.71	4.19012	2.06699	0.0194519
249771_at	G-type lectin S-receptor-like serine/threonine protein kinase	AT5G24080	AT5G24080	1×g-PCB	µ×g-PCB	30.992	129.792	4.18791	2.06623	0.0457934
261410_at	MT1C; copper ion binding	MT1C	AT1G07610	1×g-PCB	µ×g-PCB	308.889	1286.88	4.16616	2.05872	0.0312574
257271_at	bidirectional sugar transporter SWEET4	AT3G28007	AT3G28007	1×g-PCB	µ×g-PCB	74.0237	307.543	4.15466	2.05473	0.0228966
267576_at	---	---	AT2G30640	1×g-PCB	µ×g-PCB	22.6579	94.0545	4.15108	2.05349	0.0478563
246943_at	protein kinase family protein	AT5G25440	AT5G25440	1×g-PCB	µ×g-PCB	1060.15	4397.74	4.14824	2.0525	0.0019128
249134_at	hypothetical protein	AT5G43150	AT5G43150	1×g-PCB	µ×g-PCB	133.153	551.957	4.14528	2.05147	0.0377478
252862_at	putative L-ascorbate oxidase	AT4G39830	AT4G39830	1×g-PCB	µ×g-PCB	266.417	1103.56	4.1422	2.0504	0.00173299
255674_at	PIP1;4 (PLASMA MEMBRANE INTRINSIC PROTEIN 1;4); water channel	PIP1;4	AT4G00430	1×g-PCB	µ×g-PCB	1762.1	7285.01	4.13428	2.04764	0.0253197
253571_at	Calmodulin-binding protein	AT4G31000	AT4G31000	1×g-PCB	µ×g-PCB	120.519	497.639	4.12915	2.04584	0.0148317
247995_at	sec14p-like phosphatidylinositol transfer-like protein	AT5G56160	AT5G56160	1×g-PCB	µ×g-PCB	72.5623	299.168	4.12292	2.04367	0.00314633
260897_at	ERD2 (ENDOPLASMIC RETICULUM RETENTION DEFECTIVE 2); KDEL sequence binding / receptor	ERD2	AT1G29330	1×g-PCB	µ×g-PCB	294.446	1213.12	4.12001	2.04265	0.00260369
259109_at	serine/threonine-protein phosphatase PP1 isozyme 9	AT3G05580	AT3G05580	1×g-PCB	µ×g-PCB	451.216	1855.74	4.11275	2.0401	6.30121e-05
251787_at	"2-oxoglutarate dehydrogenase, E1 component"	AT3G55410	AT3G55410	1×g-PCB	µ×g-PCB	504.685	2073.52	4.10854	2.03863	0.00316609
260237_at	MYB95 (myb domain protein 95); DNA binding / transcription factor	MYB95	AT1G74430	1×g-PCB	µ×g-PCB	630.452	2583.28	4.0975	2.03474	0.0278775
259460_at	hypothetical protein	AT1G44000	AT1G44000	1×g-PCB	µ×g-PCB	171.333	701.046	4.09173	2.03271	0.0203986
252684_at	TIR-NBS-LRR class disease resistance protein	AT3G44400	AT3G44400	1×g-PCB	µ×g-PCB	52.2829	213.779	4.0889	2.03171	0.00169384
253491_at	RNA Lariat debranching enzyme	DBR1	AT4G31770	1×g-PCB	µ×g-PCB	126.213	513.96	4.07215	2.02579	0.00275172
261914_at	dirigent protein 21	AT1G65870	AT1G65870	1×g-PCB	µ×g-PCB	55.5093	226.029	4.07191	2.0257	0.0496221
263942_at	FLA16 (FASCICLIN-LIKE ARABINOGALACTAN PROTEIN 16 PRECURSOR)	FLA16	AT2G35860	1×g-PCB	µ×g-PCB	122.685	497.901	4.05836	2.0209	0.0422373
265530_at	OPR3 (OPDA-REDUCTASE 3); 12-oxophytodienoate reductase	OPR3	AT2G06050	1×g-PCB	µ×g-PCB	5170.45	20924.6	4.04696	2.01684	0.00124783
254190_at	hypothetical protein	AT4G23885	AT4G23885	1×g-PCB	µ×g-PCB	208.174	841.871	4.04407	2.01581	0.00225767
260560_at	chitinase family protein	AT2G43590	AT2G43590	1×g-PCB	µ×g-PCB	198.699	803.34	4.043	2.01542	0.0373352
248506_at	adenylate kinase 2	AT5G50370	AT5G50370	1×g-PCB	µ×g-PCB	201.794	815.829	4.04289	2.01539	0.0231248
253632_at	TET9 (TETRASPANIN9)	TET9	AT4G30430	1×g-PCB	µ×g-PCB	447.749	1805.83	4.03314	2.0119	0.0174712
254673_at	AtRABA1e (Arabidopsis Rab GTPase homolog A1e); GTP binding	AtRABA1e	AT4G18430	1×g-PCB	µ×g-PCB	49.0756	197.904	4.03264	2.01172	0.0448991
265061_at	ABC1 domain-containing kinase	AT1G61640	AT1G61640	1×g-PCB	µ×g-PCB	164.496	661.655	4.02232	2.00803	0.00300473
267544_at	CB5-B (CYTOCHROME B5 ISOFORM B); heme binding	CB5-B	AT2G32720	1×g-PCB	µ×g-PCB	79.9569	321.555	4.0216	2.00777	0.00672495
247293_at	protein TUNICAMYCIN INDUCED 1	AT5G64510	AT5G64510	1×g-PCB	µ×g-PCB	114.464	459.88	4.01769	2.00637	0.0160818
252164_at	P-loop containing nucleoside triphosphate hydrolases superfamily protein	AT3G50620	AT3G50620	1×g-PCB	µ×g-PCB	52.8042	211.984	4.01453	2.00523	0.0260775
264756_at	S-locus lectin protein kinase family protein	AT1G61370	AT1G61370	1×g-PCB	µ×g-PCB	100.347	402.844	4.01452	2.00523	0.0090607
253807_at	LORELEI-like-GPI anchored protein 3	LLG3	AT4G28280	1×g-PCB	µ×g-PCB	24.0216	96.212	4.00523	2.00189	0.047436
259786_at	GDSL esterase/lipase	AT1G29660	AT1G29660	1×g-PCB	µ×g-PCB	317.996	1271.62	3.99886	1.99959	0.0337855
262344_at	ATRBOH F (ARABIDOPSIS THALIANA RESPIRATORY BURST OXIDASE PROTEIN F); NAD(P)H oxidase	ATRBOH F	AT1G64060	1×g-PCB	µ×g-PCB	459.114	1833.18	3.99287	1.99743	0.0469395
250449_at	methyltransferase	AT5G10830	AT5G10830	1×g-PCB	µ×g-PCB	150.038	599.058	3.99271	1.99737	0.000702616
265453_at	putative cellular apoptosis susceptibility protein / importin-alpha re-exporter	AT2G46520	AT2G46520	1×g-PCB	µ×g-PCB	746.365	2979.32	3.99177	1.99703	0.00980246
265935_at	TET2 (TETRASPANIN2)	TET2	AT2G19580	1×g-PCB	µ×g-PCB	86.4712	344.856	3.9881	1.9957	0.0104703
267187_s_at	MTHFR2 (METHYLENETETRAHYDROFOLATE REDUCTASE 2); methylenetetrahydrofolate reductase (NADPH)	MTHFR2	AT2G44160 /// AT3G59970	1×g-PCB	µ×g-PCB	309.9	1235.33	3.98621	1.99502	0.0235696
261536_at	KEA1 (K EFFLUX ANTIPORTER 1); potassium ion transmembrane transporter/ potassium:hydrogen antiporter	KEA1	AT1G01790	1×g-PCB	µ×g-PCB	177.071	704.87	3.98072	1.99303	0.00013064
252383_at	"ATATH6; ATPase, coupled to transmembrane movement of substances / transporter"	ATH6	AT3G47780	1×g-PCB	µ×g-PCB	103.883	412.413	3.96997	1.98913	0.0400699
246988_at	ARM repeat superfamily protein	AT5G67340	AT5G67340	1×g-PCB	µ×g-PCB	236.8	938.761	3.96436	1.98709	0.049225
254328_at	APT3 (ADENINE PHOSPHORIBOSYL TRANSFERASE 3); adenine phosphoribosyltransferase	APT3	AT4G22570	1×g-PCB	µ×g-PCB	110.185	436.628	3.96268	1.98648	0.0203067
245749_at	hypothetical protein	AT1G51090	AT1G51090	1×g-PCB	µ×g-PCB	636.196	2520.09	3.96119	1.98593	0.0148738
246922_at	CIPK25 (CBL-INTERACTING PROTEIN KINASE 25); ATP binding / kinase/ protein kinase/ protein serine/threonine kinase	CIPK25	AT5G25110	1×g-PCB	µ×g-PCB	33.5916	132.948	3.95777	1.98469	0.0377533
265674_at	hypothetical protein	AT2G32190	AT2G32190	1×g-PCB	µ×g-PCB	630.859	2494.8	3.9546	1.98353	0.00101056
262536_at	SOUL heme-binding protein	AT1G17100	AT1G17100	1×g-PCB	µ×g-PCB	286.493	1132.02	3.95129	1.98232	0.00671008
245699_at	OTU-like cysteine protease family protein	AT5G04250	AT5G04250	1×g-PCB	µ×g-PCB	330.872	1307.2	3.95077	1.98213	0.0322318
264668_at	"2,3-bisphosphoglycerate-independent phosphoglycerate mutase 1"	AT1G09780	AT1G09780	1×g-PCB	µ×g-PCB	470.705	1858.8	3.94896	1.98147	0.000874451
256177_at	protein kinase superfamily protein	AT1G51620	AT1G51620	1×g-PCB	µ×g-PCB	65.9554	260.262	3.94603	1.9804	0.00238615
260831_at	monothiol glutaredoxin-S11	AT1G06830	AT1G06830	1×g-PCB	µ×g-PCB	65.0455	256.399	3.94184	1.97887	0.0397151
245628_at	PAP1 (PRODUCTION OF ANTHOCYANIN PIGMENT 1); DNA binding / transcription factor	PAP1	AT1G56650	1×g-PCB	µ×g-PCB	25.0104	98.1908	3.926	1.97306	0.022494
261069_at	ATRABA2B (ARABIDOPSIS RAB GTPASE HOMOLOG A2B); GTP binding / GTPase/ protein binding	ATRABA2B	AT1G07410	1×g-PCB	µ×g-PCB	28.9084	113.469	3.92512	1.97274	0.0254715
260491_at	DAD1-like lipase 2	AT1G51440	AT1G51440	1×g-PCB	µ×g-PCB	34.2342	134.305	3.92313	1.972	0.0324974
254150_at	phosphorylase family protein	AT4G24350	AT4G24350	1×g-PCB	µ×g-PCB	24.2733	95.1025	3.91799	1.97011	0.00548493
266014_s_at	hypothetical protein /// hypothetical protein /// hypothetical protein	ArthMp016 /// ArthMp055 /// AT2G07722	AT2G07722 /// ATMG00170 /// ATMG00620	1×g-PCB	µ×g-PCB	94.1753	368.716	3.91521	1.96909	0.0208521
262448_at	WD40 domain-containing protein	AT1G49450	AT1G49450	1×g-PCB	µ×g-PCB	105.086	411.328	3.9142	1.96872	0.0331394
248043_s_at	HSP81-3; ATP binding / unfolded protein binding	HSP81-3	AT5G56000 /// AT5G56010	1×g-PCB	µ×g-PCB	4412.15	17259.3	3.91176	1.96782	0.000630924
248704_at	sks3 (SKU5 Similar 3); copper ion binding / oxidoreductase	sks3	AT5G48450	1×g-PCB	µ×g-PCB	134.731	524.163	3.89045	1.95994	0.0347479
265740_at	RHA2B (RING-H2 FINGER PROTEIN 2B); protein binding / ubiquitin-protein ligase/ zinc ion binding	RHA2B	AT2G01150	1×g-PCB	µ×g-PCB	739.819	2878.09	3.89027	1.95987	0.0101786
247881_at	BNR/Asp-box repeat family protein	AT5G57700	AT5G57700	1×g-PCB	µ×g-PCB	44.6397	173.338	3.88305	1.95719	0.0387406
254521_at	Nucleotide-diphospho-sugar transferase family protein	AT5G44820	AT5G44820	1×g-PCB	µ×g-PCB	152.273	590.068	3.87506	1.95422	0.00159732
257511_at	PLATZ transcription factor family protein	AT1G43000	AT1G43000	1×g-PCB	µ×g-PCB	38.4529	148.875	3.87163	1.95294	0.0164602
250339_at	"ATNADP-ME2 (NADP-malic enzyme 2); malate dehydrogenase (oxaloacetate-decarboxylating) (NADP+)/ malic enzyme/ oxidoreductase, acting on NADH or NADPH, NAD or NADP as acceptor"	ATNADP-ME2	AT5G11670	1×g-PCB	µ×g-PCB	4329.71	16762.5	3.8715	1.95289	0.0037813
246857_at	hypothetical protein	AT5G25920	AT5G25920	1×g-PCB	µ×g-PCB	16.7408	64.773	3.86916	1.95202	0.00193187
257774_at	short-chain dehydrogenase reductase 4	AT3G29250	AT3G29250	1×g-PCB	µ×g-PCB	23.5161	90.9246	3.86649	1.95102	0.0269708
253103_at	SAUR-like auxin-responsive protein	AT4G36110	AT4G36110	1×g-PCB	µ×g-PCB	162.136	626.778	3.86576	1.95075	0.0300864
245686_at	ATJ2; protein binding	J2	AT5G22060	1×g-PCB	µ×g-PCB	1253.84	4832.69	3.85433	1.94648	0.000292149
245401_at	hypothetical protein	AT4G17670	AT4G17670	1×g-PCB	µ×g-PCB	134.487	517.002	3.84426	1.94271	0.0164573
256650_at	POLYAMINE UPTAKE TRANSPORTER 4	AT3G13620	AT3G13620	1×g-PCB	µ×g-PCB	122.201	469.526	3.84224	1.94195	0.0244166
248706_at	hypothetical protein	AT5G48530	AT5G48530	1×g-PCB	µ×g-PCB	88.3263	339.305	3.84149	1.94167	0.00307914
248292_at	hypothetical protein	AT5G53030	AT5G53030	1×g-PCB	µ×g-PCB	20.6318	79.1798	3.83775	1.94026	0.0167343
246555_at	"GAUT14 (Galacturonosyltransferase 14); polygalacturonate 4-alpha-galacturonosyltransferase/ transferase, transferring glycosyl groups / transferase, transferring hexosyl groups"	GAUT14	AT5G15470	1×g-PCB	µ×g-PCB	142.106	544.545	3.83196	1.93808	0.000814088
248896_at	WRKY8; transcription factor	WRKY8	AT5G46350	1×g-PCB	µ×g-PCB	79.547	304.792	3.8316	1.93795	0.0107776
252740_at	probable pectinesterase/pectinesterase inhibitor 32	AT3G43270	AT3G43270	1×g-PCB	µ×g-PCB	286.916	1098.8	3.8297	1.93723	0.0378812
262644_at	BETA-VPE (BETA VACUOLAR PROCESSING ENZYME); cysteine-type endopeptidase	BETA-VPE	AT1G62710	1×g-PCB	µ×g-PCB	52.98	202.606	3.82419	1.93515	0.0497035
259308_at	GDSL esterase/lipase	AT3G05180	AT3G05180	1×g-PCB	µ×g-PCB	76.3746	291.986	3.82309	1.93474	0.00991919
259405_at	hypothetical protein	AT1G17744	AT1G17744	1×g-PCB	µ×g-PCB	12.0944	46.2152	3.8212	1.93402	0.00190204
261806_at	ATRFNR2 (ROOT FNR 2); FAD binding / NADP or NADPH binding / electron carrier/ ferredoxin-NADP+ reductase/ oxidoreductase	ATRFNR2	AT1G30510	1×g-PCB	µ×g-PCB	102.184	389.39	3.81069	1.93005	0.0358901
260420_at	hypothetical protein	AT1G69610	AT1G69610	1×g-PCB	µ×g-PCB	133.133	506.835	3.80697	1.92864	0.0311904
261417_at	thioredoxin family protein	AT1G07700	AT1G07700	1×g-PCB	µ×g-PCB	595.75	2267.71	3.80648	1.92846	0.00196679
250623_at	mitochondrial ATP-Mg/Pi transporter	AT5G07320	AT5G07320	1×g-PCB	µ×g-PCB	162.793	619.362	3.80461	1.92775	0.0114286
263477_at	UDP-glycosyltransferase 74C1	AT2G31790	AT2G31790	1×g-PCB	µ×g-PCB	59.7869	227.271	3.80135	1.92651	0.0302476
262887_at	MAC/Perforin domain-containing protein	AT1G14780	AT1G14780	1×g-PCB	µ×g-PCB	99.3024	377.282	3.79933	1.92574	0.0174938
262507_at	G-type lectin S-receptor-like serine/threonine-protein kinase	AT1G11330	AT1G11330	1×g-PCB	µ×g-PCB	178.451	677.864	3.79859	1.92546	0.00757286
245451_at	"SNC1 (SUPPRESSOR OF NPR1-1, CONSTITUTIVE 1); nucleotide binding"	SNC1	AT4G16890	1×g-PCB	µ×g-PCB	261.07	990.605	3.7944	1.92387	0.000319456
263896_at	F-box associated ubiquitination effector family protein	AT2G21930	AT2G21930	1×g-PCB	µ×g-PCB	24.7315	93.7345	3.79009	1.92223	0.0315021
265147_at	DEAD-box ATP-dependent RNA helicase 34	AT1G51380	AT1G51380	1×g-PCB	µ×g-PCB	31.5772	119.618	3.78812	1.92148	0.00407115
250898_at	ADK2 (ADENOSINE KINASE 2); adenosine kinase/ copper ion binding / kinase	ADK2	AT5G03300	1×g-PCB	µ×g-PCB	387.426	1465.53	3.78273	1.91943	0.00786187
264907_at	phosphoglycerate mutase-like protein	AT2G17280	AT2G17280	1×g-PCB	µ×g-PCB	52.7241	199.227	3.77867	1.91788	0.0179776
263429_at	aminotransferase class I and II family protein	AAT	AT2G22250	1×g-PCB	µ×g-PCB	111.518	421.042	3.77555	1.91669	0.0156792
260327_at	RING/U-box domain-containing protein	AT1G63840	AT1G63840	1×g-PCB	µ×g-PCB	1228.36	4628.26	3.76785	1.91374	0.0172902
251839_at	PLA IIIA (PATATIN-LIKE PROTEIN 6)	PLA IIIA	AT3G54950	1×g-PCB	µ×g-PCB	285.211	1071.81	3.75795	1.90995	0.00840449
255250_at	AtMYB74 (myb domain protein 74); DNA binding / transcription factor	AtMYB74	AT4G05100	1×g-PCB	µ×g-PCB	267.971	1006.74	3.75691	1.90955	0.029979
249044_at	PHT4;6 (PHOSPHATE TRANSPORTER 4;6); carbohydrate transmembrane transporter/ inorganic phosphate transmembrane transporter/ organic anion transmembrane transporter/ sugar:hydrogen symporter	PHT4;6	AT5G44370	1×g-PCB	µ×g-PCB	82.6591	310.368	3.7548	1.90874	0.0208384
267229_s_at	NagB/RpiA/CoA transferase-like superfamily protein /// translation initiation factor eIF-2B delta subunit-like protein	AT2G44070 /// AT5G38640	AT2G44070 /// AT5G38640	1×g-PCB	µ×g-PCB	333.103	1249.86	3.75216	1.90772	0.0168038
254857_at	SEC1B; protein transporter	SEC1B	AT4G12120	1×g-PCB	µ×g-PCB	184.806	692.199	3.74553	1.90517	0.000840356
246708_at	hypothetical protein	AT5G28150	AT5G28150	1×g-PCB	µ×g-PCB	209.402	784.019	3.74409	1.90461	0.0172774
245760_s_at	putative protein kinase /// putative serine/threonine protein kinase	AT1G66910 /// AT1G66920	AT1G66910 /// AT1G66920	1×g-PCB	µ×g-PCB	153.713	575.494	3.74395	1.90456	0.0123731
257204_at	RALFL24 (ralf-like 24); signal transducer	RALFL24	AT3G23805	1×g-PCB	µ×g-PCB	66.4787	248.794	3.74247	1.90399	0.0449935
252010_at	hypothetical protein	AT3G52740	AT3G52740	1×g-PCB	µ×g-PCB	27.1693	101.627	3.74052	1.90324	0.00469848
261269_at	transmembrane emp24 domain-containing protein	AT1G26690	AT1G26690	1×g-PCB	µ×g-PCB	233.75	871.341	3.72766	1.89827	0.00295856
257535_at	tetratricopeptide repeat domain-containing protein	AT3G09490	AT3G09490	1×g-PCB	µ×g-PCB	103.786	386.735	3.72626	1.89773	0.000894916
252863_at	MIPS1 (MYO-INOSITOL-1-PHOSTPATE SYNTHASE 1); inositol-3-phosphate synthase	MIPS1	AT4G39800	1×g-PCB	µ×g-PCB	664.243	2472.57	3.72239	1.89623	0.0191855
259213_at	protein kinase	AT3G09010	AT3G09010	1×g-PCB	µ×g-PCB	98.7474	366.907	3.71561	1.8936	0.0118064
246620_at	CYP81D1 (CYTOCHROME P450 81D1); electron carrier/ heme binding / iron ion binding / monooxygenase/ oxygen binding	CYP81D1	AT5G36220	1×g-PCB	µ×g-PCB	526.887	1956.19	3.71273	1.89248	0.00291171
261309_at	CPuORF31 (Conserved peptide upstream open reading frame 31)	CPuORF31	AT1G48598 /// AT1G48600	1×g-PCB	µ×g-PCB	95.6989	355.207	3.71172	1.89209	0.0407955
257375_at	hypothetical protein	AT2G38640	AT2G38640	1×g-PCB	µ×g-PCB	99.034	367.17	3.70751	1.89045	0.00680412
263510_s_at	cytochrome C assembly protein /// Cytochrome C assembly protein /// cytochrome c biogenesis orf256	AT2G07681 /// AT2G07771 /// ccb256	AT2G07681 /// AT2G07771 /// ATMG00900	1×g-PCB	µ×g-PCB	59.3011	219.438	3.7004	1.88768	0.00969528
251105_at	ATSCAR4	ATSCAR4	AT5G01730	1×g-PCB	µ×g-PCB	155.699	576.112	3.70016	1.88759	0.0120735
259325_at	O-fucosyltransferase family protein	AT3G05320	AT3G05320	1×g-PCB	µ×g-PCB	182.463	674.679	3.69763	1.8866	0.00347323
247358_at	FLS2 (FLAVONOL SYNTHASE 2); flavonol synthase	FLS2	AT5G63580	1×g-PCB	µ×g-PCB	43.1514	159.505	3.6964	1.88612	0.0499456
254850_at	SNARE associated Golgi family protein	AT4G12000	AT4G12000	1×g-PCB	µ×g-PCB	808.399	2985.48	3.69308	1.88482	0.00428198
264535_at	Sec14p-like phosphatidylinositol transfer family protein	AT1G55690	AT1G55690	1×g-PCB	µ×g-PCB	111.129	410.285	3.69199	1.8844	0.0259932
267040_at	putative methyltransferase PMT25	AT2G34300	AT2G34300	1×g-PCB	µ×g-PCB	440.237	1624.96	3.6911	1.88405	0.0212078
267429_at	MEE25 (maternal effect embryo arrest 25); UDP-glucose 4-epimerase/ binding / catalytic/ coenzyme binding	MEE25	AT2G34850	1×g-PCB	µ×g-PCB	34.4226	126.919	3.68709	1.88248	0.0194699
261378_at	ATCDPK1 (CALCIUM-DEPENDENT PROTEIN KINASE 1); calmodulin-dependent protein kinase/ kinase/ protein kinase	ATCDPK1	AT1G18890	1×g-PCB	µ×g-PCB	609.73	2246.23	3.68397	1.88126	0.00373957
263867_at	GAMMA-TIP (GAMMA TONOPLAST INTRINSIC PROTEIN); water channel	GAMMA-TIP	AT2G36830	1×g-PCB	µ×g-PCB	1599.75	5875.55	3.6728	1.87688	0.0178846
262085_at	hypothetical protein	AT1G56060	AT1G56060	1×g-PCB	µ×g-PCB	905.695	3323.17	3.66919	1.87546	0.0253023
264348_at	NRT1.1; nitrate transmembrane transporter/ transporter	NRT1.1	AT1G12110	1×g-PCB	µ×g-PCB	371.706	1360.85	3.66109	1.87228	0.00499887
260405_at	ATGSTU11 (GLUTATHIONE S-TRANSFERASE TAU 11); glutathione transferase	ATGSTU11	AT1G69930	1×g-PCB	µ×g-PCB	252.065	922.261	3.65883	1.87138	0.0226655
252437_at	plant invertase/pectin methylesterase inhibitor superfamily protein	AT3G47380	AT3G47380	1×g-PCB	µ×g-PCB	100.181	365.877	3.65214	1.86874	0.0416508
247312_at	ring domain ligase 3	AT5G63970	AT5G63970	1×g-PCB	µ×g-PCB	326.701	1192.67	3.65066	1.86816	0.0122842
251903_at	reticulon-like protein B12	AT3G54120	AT3G54120	1×g-PCB	µ×g-PCB	89.9505	328.066	3.64719	1.86679	0.000929974
254862_at	probable sodium/metabolite cotransporter BASS5	BAT5	AT4G12030	1×g-PCB	µ×g-PCB	34.2869	125.038	3.6468	1.86663	0.021299
244946_at	---	---	---	1×g-PCB	µ×g-PCB	23.7482	86.4881	3.64189	1.86469	0.0177301
266825_at	Kua-ubiquitin conjugating enzyme hybrid localisation domain-containing protein	AT2G22890	AT2G22890	1×g-PCB	µ×g-PCB	110.723	403.046	3.64011	1.86398	0.000117325
247450_at	plant invertase/pectin methylesterase inhibitor superfamily protein	AT5G62350	AT5G62350	1×g-PCB	µ×g-PCB	4474.75	16278	3.63774	1.86304	0.00793924
263465_at	hypothetical protein	AT2G31940	AT2G31940	1×g-PCB	µ×g-PCB	139.449	506.687	3.6335	1.86136	0.0109037
250918_at	GDSL esterase/lipase	AT5G03610	AT5G03610	1×g-PCB	µ×g-PCB	1752.48	6362.67	3.63067	1.86024	0.0277151
249730_at	CDPK-related kinase 4 (AtCRK4)	AT5G24430	AT5G24430	1×g-PCB	µ×g-PCB	794.002	2882.28	3.63007	1.86	0.00849223
245152_at	NAD+ transporter 1	NDT1	AT2G47490	1×g-PCB	µ×g-PCB	511.293	1855.59	3.62922	1.85966	0.00851647
250279_at	GRAM domain family protein	AT5G13200	AT5G13200	1×g-PCB	µ×g-PCB	2412.29	8744.62	3.62503	1.85799	0.00496852
260429_at	JAZ6 (JASMONATE-ZIM-DOMAIN PROTEIN 6)	JAZ6	AT1G72450	1×g-PCB	µ×g-PCB	3702.11	13408	3.62173	1.85668	0.000111621
262912_at	probable peptide/nitrate transporter	AT1G59740	AT1G59740	1×g-PCB	µ×g-PCB	266.057	963.563	3.62164	1.85664	0.0355795
262930_at	late embryogenesis abundant (LEA) hydroxyproline-rich glycoprotein	AT1G65690	AT1G65690	1×g-PCB	µ×g-PCB	325.556	1178.64	3.62038	1.85614	0.0458346
248619_at	AAP6 (AMINO ACID PERMEASE 6); acidic amino acid transmembrane transporter/ amino acid transmembrane transporter/ neutral amino acid transmembrane transporter	AAP6	AT5G49630	1×g-PCB	µ×g-PCB	419.398	1515.28	3.61299	1.85319	0.00127498
257317_at	hypothetical protein	ArthMp093	ATMG01060	1×g-PCB	µ×g-PCB	41.2704	148.932	3.60868	1.85147	0.017624
252958_at	MYB4; DNA binding / transcription factor	MYB4	AT4G38620	1×g-PCB	µ×g-PCB	308.399	1112.68	3.60792	1.85117	0.0452931
252119_at	"ATTRX1; oxidoreductase, acting on sulfur group of donors, disulfide as acceptor"	ATTRX1	AT3G51030	1×g-PCB	µ×g-PCB	66.9164	241.364	3.60695	1.85078	0.0237421
264014_at	SAUR-like auxin-responsive protein	AT2G21210	AT2G21210	1×g-PCB	µ×g-PCB	33.511	120.863	3.60666	1.85066	0.0394392
255594_at	ATABC1 (ARABIDOPSIS THALIANA ABC TRANSPORTER 1); transporter	ATABC1	AT4G01660	1×g-PCB	µ×g-PCB	172.222	620.722	3.6042	1.84968	0.00972434
250448_at	probable folate-biopterin transporter 6	AT5G10820	AT5G10820	1×g-PCB	µ×g-PCB	206.381	743.836	3.6042	1.84968	0.000500571
261129_at	TUA4; structural constituent of cytoskeleton	TUA4	AT1G04820	1×g-PCB	µ×g-PCB	760.516	2739.49	3.60215	1.84886	0.0180382
249025_at	molybdenum cofactor sulfurase family protein	AT5G44720	AT5G44720	1×g-PCB	µ×g-PCB	270.719	974.64	3.60019	1.84807	0.0125458
260023_at	ATGA2OX2 (GIBBERELLIN 2-OXIDASE); gibberellin 2-beta-dioxygenase	ATGA2OX2	AT1G30040	1×g-PCB	µ×g-PCB	402.803	1446.44	3.59094	1.84436	0.0479169
245080_at	Leucine-rich repeat protein kinase family protein	AT2G23300	AT2G23300	1×g-PCB	µ×g-PCB	35.0561	125.846	3.58986	1.84393	0.00386698
247037_at	RALFL34 (ralf-like 34); signal transducer	RALFL34	AT5G67070	1×g-PCB	µ×g-PCB	634.661	2276.88	3.58755	1.843	0.0255883
262731_at	MC8 (METACASPASE 8); cysteine-type endopeptidase	MC8	AT1G16420	1×g-PCB	µ×g-PCB	35.5285	127.437	3.58691	1.84274	0.0182987
249552_s_at	Protein kinase family protein /// Protein kinase family protein	AT5G38240 /// AT5G38250	AT5G38240 /// AT5G38250	1×g-PCB	µ×g-PCB	171.664	614.951	3.58229	1.84088	0.031299
254901_at	putative cysteine-rich receptor-like protein kinase 35	CRK34	AT4G11530	1×g-PCB	µ×g-PCB	34.257	122.646	3.58017	1.84003	0.0061329
259472_at	zinc ion binding protein	AT1G18910	AT1G18910	1×g-PCB	µ×g-PCB	132.466	472.991	3.57066	1.83619	0.0120917
248466_at	ATHVA22E	HVA22E	AT5G50720	1×g-PCB	µ×g-PCB	201.889	720.775	3.57016	1.83599	0.0430405
257861_at	nicotinate transporter	AT3G13050	AT3G13050	1×g-PCB	µ×g-PCB	491.647	1754.48	3.56857	1.83535	0.00175767
267497_at	monothiol glutaredoxin-S9	AT2G30540	AT2G30540	1×g-PCB	µ×g-PCB	111.262	396.997	3.56814	1.83517	0.0343018
266802_at	putative glycosyltransferase 7	AT2G22900	AT2G22900	1×g-PCB	µ×g-PCB	174.878	623.757	3.56681	1.83463	0.0214985
264130_at	hypothetical protein	AT1G79160	AT1G79160	1×g-PCB	µ×g-PCB	456.355	1626.18	3.56342	1.83326	0.0181801
247232_at	ATATH13; transporter	ATH13	AT5G64940	1×g-PCB	µ×g-PCB	363.143	1293.97	3.56324	1.83319	0.00218891
254134_at	argininosuccinate synthase	AT4G24830	AT4G24830	1×g-PCB	µ×g-PCB	255.786	908.426	3.5515	1.82843	0.0138561
247138_at	putative 3-dehydroquinate synthase	AT5G66120	AT5G66120	1×g-PCB	µ×g-PCB	337.327	1197.47	3.54988	1.82777	0.0102443
258356_at	hypothetical protein	AT3G14340	AT3G14340	1×g-PCB	µ×g-PCB	104.62	370.17	3.53822	1.82303	0.013576
259383_at	JR1	JR1	AT3G16470	1×g-PCB	µ×g-PCB	3142.69	11110.6	3.53538	1.82187	0.0261455
263295_at	AGL44 (AGAMOUS-LIKE 44); DNA binding / transcription factor	AGL44	AT2G14210	1×g-PCB	µ×g-PCB	9.7018	34.2942	3.53483	1.82164	0.0166435
258655_at	Isocitrate dehydrogenase [NAD] catalytic subunit 6	IDH-VI	AT3G09810	1×g-PCB	µ×g-PCB	162.302	573.089	3.531	1.82008	0.00204024
256366_at	serine/threonine protein kinase	AT1G66880	AT1G66880	1×g-PCB	µ×g-PCB	673.48	2377.17	3.52968	1.81954	0.00376497
249029_at	TIR-NBS-LRR class disease resistance protein LAZ5	AT5G44870	AT5G44870	1×g-PCB	µ×g-PCB	410.645	1449.34	3.52943	1.81943	0.00226755
249059_at	Subtilase family protein	AT5G44530	AT5G44530	1×g-PCB	µ×g-PCB	63.3054	222.635	3.51685	1.81428	0.00660936
248132_at	SGP1; GTP binding	SGP1	AT5G54840	1×g-PCB	µ×g-PCB	218.313	766.777	3.51228	1.81241	0.0136916
254390_at	CPK15; ATP binding / calcium ion binding / calmodulin-dependent protein kinase/ kinase/ protein kinase/ protein serine/threonine kinase	CPK15	AT4G21940	1×g-PCB	µ×g-PCB	114.194	400.73	3.50919	1.81114	0.00766795
253778_at	DNAJ heat shock protein	AT4G28480	AT4G28480	1×g-PCB	µ×g-PCB	392.467	1377.23	3.50916	1.81113	0.000502424
249093_at	hypothetical protein	AT5G43880	AT5G43880	1×g-PCB	µ×g-PCB	163.342	572.287	3.5036	1.80884	0.0217979
248700_at	ATGLR1.2; intracellular ligand-gated ion channel	ATGLR1.2	AT5G48400	1×g-PCB	µ×g-PCB	78.5007	274.932	3.50228	1.80829	0.0324412
267380_at	CYP711A1; electron carrier/ heme binding / iron ion binding / monooxygenase/ oxygen binding	CYP711A1	AT2G26170	1×g-PCB	µ×g-PCB	262.911	920.756	3.50217	1.80825	0.00361246
260714_at	CPN10 (CHAPERONIN 10); chaperone binding	CPN10	AT1G14980	1×g-PCB	µ×g-PCB	843.641	2954.05	3.50155	1.80799	0.000361843
251752_at	PROT2 (PROLINE TRANSPORTER 2); L-proline transmembrane transporter/ amino acid transmembrane transporter	PROT2	AT3G55740	1×g-PCB	µ×g-PCB	199.963	700.087	3.50108	1.8078	0.00126522
254447_at	FAD-binding Berberine family protein	AT4G20860	AT4G20860	1×g-PCB	µ×g-PCB	1303.5	4559.32	3.49777	1.80643	0.0185856
264372_at	ATGLX1 (GLYOXALASE I HOMOLOG); lactoylglutathione lyase/ metal ion binding	ATGLX1	AT1G11840	1×g-PCB	µ×g-PCB	691.746	2418.7	3.49652	1.80592	0.0124845
247688_at	hypothetical protein	AT5G59760	AT5G59760	1×g-PCB	µ×g-PCB	15.4239	53.8883	3.49381	1.8048	0.0288398
246982_s_at	hypothetical protein /// hypothetical protein	AT2G10560 /// AT5G04860	AT2G10560 /// AT5G04860	1×g-PCB	µ×g-PCB	117.21	409.362	3.49254	1.80428	0.012508
266334_at	putative transmembrane protein	AT2G32380	AT2G32380	1×g-PCB	µ×g-PCB	98.0573	342.243	3.49023	1.80332	0.0071601
265283_at	"MUR3 (MURUS 3); catalytic/ transferase, transferring glycosyl groups"	MUR3	AT2G20370	1×g-PCB	µ×g-PCB	304.655	1063.11	3.48955	1.80304	0.00109289
260072_at	hypothetical protein	AT1G73650	AT1G73650	1×g-PCB	µ×g-PCB	267.904	934.149	3.48688	1.80194	0.000724073
253646_at	ATMKK2 (ARABIDOPSIS THALIANA MAP KINASE KINASE 2); MAP kinase kinase/ kinase	ATMKK2	AT4G29810	1×g-PCB	µ×g-PCB	553.93	1930.42	3.48495	1.80114	0.0048489
260179_at	HWI1 (HOPW1-1-INDUCED GENE1)	HWI1	AT1G70690	1×g-PCB	µ×g-PCB	128.801	448.359	3.48103	1.79951	0.0209683
257322_at	NADH dehydrogenase subunit 1	nad1	ATMG01180	1×g-PCB	µ×g-PCB	93.36	324.062	3.4711	1.79539	0.0120672
247687_at	UDP-galactose/UDP-glucose transporter 5B	AT5G59740	AT5G59740	1×g-PCB	µ×g-PCB	93.8449	325.691	3.47052	1.79515	0.00166331
257295_at	GPK1; ATP binding / kinase/ protein kinase/ protein serine/threonine kinase	GPK1	AT3G17420	1×g-PCB	µ×g-PCB	187.092	649.081	3.46932	1.79465	0.0155843
244931_at	hypothetical protein	ArthMp056	ATMG00630	1×g-PCB	µ×g-PCB	50.7411	175.614	3.46099	1.79118	0.0183835
267012_at	PLP6 (PATATIN-LIKE PROTEIN 6); nutrient reservoir	PLP6	AT2G39220	1×g-PCB	µ×g-PCB	144.361	498.883	3.45581	1.78902	0.0108772
256518_at	hypothetical protein	AT1G66080	AT1G66080	1×g-PCB	µ×g-PCB	128.317	443.419	3.45566	1.78896	0.0163382
254255_at	cysteine-rich receptor-like protein kinase 14	CRK14	AT4G23220	1×g-PCB	µ×g-PCB	910.986	3144.18	3.45141	1.78719	0.00588998
246334_at	serine/threonine kinase 23	AT3G44850	AT3G44850	1×g-PCB	µ×g-PCB	117.487	405.483	3.4513	1.78714	0.00662818
253203_at	ADC2 (ARGININE DECARBOXYLASE 2); arginine decarboxylase	ADC2	AT4G34710	1×g-PCB	µ×g-PCB	3442.96	11876.9	3.44962	1.78644	0.0101291
245365_at	RNA recognition motif-containing protein	AT4G17720	AT4G17720	1×g-PCB	µ×g-PCB	505.93	1744.27	3.44764	1.78561	0.0137717
245734_at	alpha/beta-Hydrolases superfamily protein	AT1G73480	AT1G73480	1×g-PCB	µ×g-PCB	2297.68	7916.09	3.44526	1.78461	0.0014608
247651_at	HTA6; DNA binding	HTA6	AT5G59870	1×g-PCB	µ×g-PCB	139.217	479.531	3.4445	1.78429	0.0426856
247861_at	formin-like protein 13	AT5G58160	AT5G58160	1×g-PCB	µ×g-PCB	47.2405	162.652	3.44307	1.7837	9.79471e-05
266992_at	MLO12 (MILDEW RESISTANCE LOCUS O 12); calmodulin binding	MLO12	AT2G39200	1×g-PCB	µ×g-PCB	251.756	866.782	3.44294	1.78364	0.00518103
252880_at	"Lipase/lipooxygenase, PLAT/LH2 family protein"	AT4G39730	AT4G39730	1×g-PCB	µ×g-PCB	785.345	2703.17	3.44202	1.78325	0.00359863
266320_at	protein TILLER ANGLE CONTROL 1	AT2G46640	AT2G46640	1×g-PCB	µ×g-PCB	39.7815	136.846	3.43994	1.78238	0.0267417
258276_at	peptidase S24/S26A/S26B/S26C family protein	AT3G15710	AT3G15710	1×g-PCB	µ×g-PCB	566.325	1946.48	3.43703	1.78116	0.0127347
267165_at	RLK (receptor lectin kinase); kinase	RLK	AT2G37710	1×g-PCB	µ×g-PCB	1369.47	4703.51	3.43454	1.78012	0.00161085
262159_at	hypothetical protein	AT1G52720	AT1G52720	1×g-PCB	µ×g-PCB	530.873	1823.23	3.43441	1.78006	0.0141393
257336_at	hypothetical protein	ArthMp112	ATMG01410	1×g-PCB	µ×g-PCB	38.106	130.807	3.43271	1.77935	0.0398965
261354_at	atnudt3 (Arabidopsis thaliana Nudix hydrolase homolog 3); hydrolase	atnudt3	AT1G79690	1×g-PCB	µ×g-PCB	450.042	1544.84	3.43266	1.77933	0.00292476
257960_at	CPuORF11 (Conserved peptide upstream open reading frame 11)	CPuORF11	AT3G25570 /// AT3G25572	1×g-PCB	µ×g-PCB	127.839	438.605	3.43092	1.77859	0.0231919
265852_at	RING-H2 finger protein ATL40	AT2G42350	AT2G42350	1×g-PCB	µ×g-PCB	93.0305	319.122	3.43029	1.77833	0.00468549
251319_at	galactose mutarotase-like superfamily protein	AT3G61610	AT3G61610	1×g-PCB	µ×g-PCB	36.9432	126.641	3.428	1.77737	0.0035879
264515_at	Early-responsive to dehydration stress protein ERD4	AT1G10090	AT1G10090	1×g-PCB	µ×g-PCB	651.754	2233.22	3.42648	1.77673	0.0135819
255901_at	GER2; binding / catalytic/ coenzyme binding	GER2	AT1G17890	1×g-PCB	µ×g-PCB	128.91	440.895	3.42018	1.77407	0.00827462
260944_at	BGAL5 (beta-galactosidase 5); beta-galactosidase/ catalytic/ cation binding	BGAL5	AT1G45130	1×g-PCB	µ×g-PCB	141.163	481.984	3.41437	1.77162	0.0302995
253590_at	HHP2 (HEPTAHELICAL TRANSMEMBRANE PROTEIN2); receptor	HHP2	AT4G30850	1×g-PCB	µ×g-PCB	132.196	450.893	3.41079	1.77011	0.00410164
267005_at	NAD(P)-binding Rossmann-fold-containing protein	AT2G34460	AT2G34460	1×g-PCB	µ×g-PCB	188.435	641.932	3.40665	1.76835	0.0362383
262656_at	RING finger domain-containing protein	AT1G14200	AT1G14200	1×g-PCB	µ×g-PCB	587.525	2001.24	3.40621	1.76817	0.0120677
249558_at	hypothetical protein	AT5G38310	AT5G38310	1×g-PCB	µ×g-PCB	74.8234	253.615	3.38951	1.76108	0.0163823
252317_at	HXXXD-type acyl-transferase family protein	AT3G48720	AT3G48720	1×g-PCB	µ×g-PCB	40.2069	136.208	3.38768	1.7603	0.0257807
256303_at	TIR-NBS-LRR class disease resistance protein	AT1G69550	AT1G69550	1×g-PCB	µ×g-PCB	100.727	341.135	3.38673	1.75989	0.0113992
246272_at	"MES9 (METHYL ESTERASE 9); hydrolase, acting on ester bonds / methyl indole-3-acetate esterase/ methyl jasmonate esterase/ methyl salicylate esterase"	MES9	AT4G37150	1×g-PCB	µ×g-PCB	67.1943	227.523	3.38604	1.7596	0.0373757
248261_at	PDV1 (PLASTID DIVISION1)	PDV1	AT5G53280	1×g-PCB	µ×g-PCB	105.149	355.945	3.38515	1.75922	0.0010212
263779_at	SPA1 (SUPPRESSOR OF PHYA-105 1); protein binding / signal transducer	SPA1	AT2G46340	1×g-PCB	µ×g-PCB	684.976	2317.98	3.38403	1.75874	0.00332324
253219_at	AtMYB32 (myb domain protein 32); DNA binding / transcription factor	AtMYB32	AT4G34990	1×g-PCB	µ×g-PCB	437.342	1479.51	3.38295	1.75828	0.0107506
244926_s_at	maturase	matR	AT2G07712 /// ATMG00520	1×g-PCB	µ×g-PCB	48.3053	163.242	3.37939	1.75676	0.0137609
262980_at	"AtGH9B7 (Arabidopsis thaliana glycosyl hydrolase 9B7); catalytic/ hydrolase, hydrolyzing O-glycosyl compounds"	AtGH9B7	AT1G75680	1×g-PCB	µ×g-PCB	483.491	1633.44	3.37843	1.75635	0.0261215
260367_at	hypothetical protein	AT1G69760	AT1G69760	1×g-PCB	µ×g-PCB	317.583	1071.52	3.37398	1.75445	0.00637793
247026_at	MAPKKK19; ATP binding / kinase/ protein kinase/ protein serine/threonine kinase	MAPKKK19	AT5G67080	1×g-PCB	µ×g-PCB	551.575	1860.98	3.37394	1.75443	0.0360321
251090_at	mitochondrial substrate carrier family protein	AT5G01340	AT5G01340	1×g-PCB	µ×g-PCB	172.853	582.217	3.36828	1.75201	0.0134207
246445_at	nucleotide/sugar transporter family protein	AT5G17630	AT5G17630	1×g-PCB	µ×g-PCB	219.979	740.594	3.36665	1.75132	0.000109605
250920_at	hypothetical protein	AT5G03390	AT5G03390	1×g-PCB	µ×g-PCB	57.299	192.874	3.36609	1.75108	0.0154346
252328_at	protein transport protein sec61 subunit gamma-3	AT3G48570	AT3G48570	1×g-PCB	µ×g-PCB	555.155	1868.69	3.36607	1.75106	0.00378065
266878_at	zinc ion binding protein	AT2G44580	AT2G44580	1×g-PCB	µ×g-PCB	82.5331	277.761	3.36545	1.7508	0.0357386
256457_at	DNA glycosylase superfamily protein	AT1G75230	AT1G75230	1×g-PCB	µ×g-PCB	358.484	1206.06	3.36434	1.75032	0.0171795
265025_at	hypothetical protein	AT1G24575	AT1G24575	1×g-PCB	µ×g-PCB	121.155	407.092	3.3601	1.74851	0.0419774
267142_at	ATAMT2 (AMMONIUM TRANSPORTER 2); ammonium transmembrane transporter/ high affinity secondary active ammonium transmembrane transporter	ATAMT2	AT2G38290	1×g-PCB	µ×g-PCB	659.101	2213.8	3.35881	1.74795	0.00676945
253039_at	SQE3 (squalene epoxidase 3); squalene monooxygenase	SQE3	AT4G37760	1×g-PCB	µ×g-PCB	452.941	1521.21	3.35852	1.74783	0.00859926
251054_at	LECRKA4.1 (LECTIN RECEPTOR KINASE A4.1); kinase	LECRKA4.1	AT5G01540	1×g-PCB	µ×g-PCB	1033.35	3466.28	3.3544	1.74605	0.000865853
265742_at	ribose 5-phosphate isomerase A	RPI2	AT2G01290	1×g-PCB	µ×g-PCB	225.413	755.403	3.3512	1.74468	0.00491724
244906_at	unknown protein	ORF240A	ATMG00690	1×g-PCB	µ×g-PCB	191.117	639.628	3.34679	1.74278	0.00947112
245504_at	monothiol glutaredoxin-S8	AT4G15660	AT4G15660	1×g-PCB	µ×g-PCB	122.37	409.018	3.34248	1.74092	0.00690974
254076_at	peptidyl-prolyl cis-trans isomerase FKBP53	FKBP53	AT4G25340	1×g-PCB	µ×g-PCB	189.419	632.873	3.34113	1.74034	0.00158068
247239_at	putative pectinesterase/pectinesterase inhibitor 64	AT5G64640	AT5G64640	1×g-PCB	µ×g-PCB	70.7337	235.818	3.33388	1.7372	0.0117709
260590_at	ATPPC1 (PHOSPHOENOLPYRUVATE CARBOXYLASE 1); catalytic/ phosphoenolpyruvate carboxylase	ATPPC1	AT1G53310	1×g-PCB	µ×g-PCB	462.937	1542.84	3.33271	1.7367	0.000428726
250930_at	ATP58IPK (ARABIDOPSIS HOMOLOG OF MAMALLIAN P58IPK); binding / heat shock protein binding	ATP58IPK	AT5G03160	1×g-PCB	µ×g-PCB	64.2102	213.958	3.33215	1.73646	0.00169027
266290_at	ATGSTU1 (GLUTATHIONE S-TRANSFERASE TAU 1); glutathione transferase	ATGSTU1	AT2G29490	1×g-PCB	µ×g-PCB	71.5007	238.041	3.32921	1.73518	0.0425598
252608_at	P-loop containing nucleoside triphosphate hydrolases superfamily protein	AT3G45090	AT3G45090	1×g-PCB	µ×g-PCB	56.3821	187.668	3.32849	1.73487	0.0310202
246756_at	putative protein phosphatase 2C 73	AT5G27930	AT5G27930	1×g-PCB	µ×g-PCB	452.629	1505.72	3.3266	1.73405	0.01166
251049_at	transducin/WD40 domain-containing protein	AT5G02430	AT5G02430	1×g-PCB	µ×g-PCB	41.4614	137.925	3.3266	1.73405	0.0355172
263829_at	hypothetical protein	AT2G40435	AT2G40435	1×g-PCB	µ×g-PCB	37.2919	124.03	3.32593	1.73376	0.00561353
248763_at	cysteine proteinase inhibitor 5	AT5G47550	AT5G47550	1×g-PCB	µ×g-PCB	315.718	1049.08	3.32282	1.73241	0.00980509
257719_at	AtALMT9 (aluminum-activated malate transporter 9); anion channel	AtALMT9	AT3G18440	1×g-PCB	µ×g-PCB	112.437	373.528	3.3221	1.73209	0.0142526
255763_at	hypothetical protein	UP6	AT1G16730	1×g-PCB	µ×g-PCB	62.7282	208.363	3.32168	1.73191	0.00865565
250074_at	UTP--glucose-1-phosphate uridylyltransferase 1	UGP2	AT5G17310	1×g-PCB	µ×g-PCB	275.737	915.295	3.31945	1.73094	0.0114809
266511_at	zinc finger CCCH domain-containing protein 31	AT2G47680	AT2G47680	1×g-PCB	µ×g-PCB	101.693	336.801	3.31192	1.72767	0.00284981
266464_at	"ATMRP4 (ARABIDOPSIS THALIANA MULTIDRUG RESISTANCE-ASSOCIATED PROTEIN 4); ATPase, coupled to transmembrane movement of substances / folic acid transporter"	ATMRP4	AT2G47800	1×g-PCB	µ×g-PCB	129.683	429.307	3.31044	1.72702	0.0242145
260841_at	hypothetical protein	AT1G29195	AT1G29195	1×g-PCB	µ×g-PCB	29.3644	97.2076	3.31038	1.727	0.0107029
266901_at	JAZ7 (JASMONATE-ZIM-DOMAIN PROTEIN 7)	JAZ7	AT2G34600	1×g-PCB	µ×g-PCB	2143.03	7086.24	3.30664	1.72537	0.0167512
267411_at	disease resistance family protein / LRR family protein	AT2G34930	AT2G34930	1×g-PCB	µ×g-PCB	1477.24	4881.96	3.30478	1.72455	0.0360113
251973_at	nodulin/glutamine synthase-like protein	AT3G53180	AT3G53180	1×g-PCB	µ×g-PCB	871.638	2879.32	3.30334	1.72393	0.00541236
266798_at	AtbZIP6 (Arabidopsis thaliana basic leucine-zipper 6); DNA binding / transcription factor	AtbZIP6	AT2G22850	1×g-PCB	µ×g-PCB	298.176	983.127	3.29714	1.72121	0.00805228
247820_at	SIP1 (SOS3-INTERACTING PROTEIN 1); ATP binding / kinase/ protein kinase/ protein serine/threonine kinase	SIP1	AT5G58380	1×g-PCB	µ×g-PCB	243.111	801.451	3.29665	1.721	0.0111096
249314_at	putative leucine-rich repeat transmembrane protein kinase	AT5G41180	AT5G41180	1×g-PCB	µ×g-PCB	40.33	132.929	3.29604	1.72073	0.00114093
247751_at	hypothetical protein	AT5G59050	AT5G59050	1×g-PCB	µ×g-PCB	81.293	267.776	3.29397	1.71983	0.0160957
264270_at	BGLU5 (BETA GLUCOSIDASE 5)	BGLU5	AT1G60260	1×g-PCB	µ×g-PCB	146.359	482.088	3.29387	1.71979	0.0127489
258742_at	activation-tagged BRI1 suppressor 1-interacting factor 1	AIF1	AT3G05800	1×g-PCB	µ×g-PCB	89.4726	294.654	3.29324	1.71951	0.0294068
262694_at	Bifunctional inhibitor/lipid-transfer protein/seed storage 2S albumin superfamily protein	AT1G62790	AT1G62790	1×g-PCB	µ×g-PCB	446.326	1469.43	3.29228	1.71909	0.011308
253638_at	cinnamoyl-CoA reductase like protein	AT4G30470	AT4G30470	1×g-PCB	µ×g-PCB	1201.77	3949.34	3.28627	1.71645	0.00570931
266415_at	LTP2 (LIPID TRANSFER PROTEIN 2); lipid binding	LTP2	AT2G38530	1×g-PCB	µ×g-PCB	6376.22	20940.1	3.28409	1.7155	0.0351717
251722_at	putative amino acid transporter	AT3G56200	AT3G56200	1×g-PCB	µ×g-PCB	728.86	2389.8	3.27883	1.71318	0.00919783
265943_at	CDA1 (CYTIDINE DEAMINASE 1); cytidine deaminase	CDA1	AT2G19570	1×g-PCB	µ×g-PCB	252.842	827.428	3.27251	1.7104	0.000281804
266532_at	UDP-glycosyltransferase 90A1	AT2G16890	AT2G16890	1×g-PCB	µ×g-PCB	32.8807	107.407	3.26656	1.70777	0.00478565
253606_at	gamma-glutamyl peptidase 1	AT4G30530	AT4G30530	1×g-PCB	µ×g-PCB	4814.21	15722.7	3.26589	1.70748	0.00128812
249806_at	hypothetical protein	AT5G23850	AT5G23850	1×g-PCB	µ×g-PCB	631.863	2062.07	3.26347	1.70641	0.00375718
247569_at	leucine-rich repeat-containing protein	AT5G61240	AT5G61240	1×g-PCB	µ×g-PCB	496.177	1617.18	3.25928	1.70455	0.0124747
251157_at	CSP41A (CHLOROPLAST STEM-LOOP BINDING PROTEIN OF 41 KDA); mRNA binding / poly(U) binding	CSP41A	AT3G63140	1×g-PCB	µ×g-PCB	90.3445	293.906	3.25316	1.70184	0.0110609
257916_at	transcription factor bHLH34	bHLH34	AT3G23210	1×g-PCB	µ×g-PCB	150.609	489.008	3.24686	1.69905	0.0021048
263419_at	putative serine/threonine-specific protein kinase kin3	AT2G17220	AT2G17220	1×g-PCB	µ×g-PCB	1351.44	4384.76	3.2445	1.698	0.000579517
264745_at	APR2 (5'ADENYLYLPHOSPHOSULFATE REDUCTASE 2); adenylyl-sulfate reductase/ phosphoadenylyl-sulfate reductase (thioredoxin)	APR2	AT1G62180	1×g-PCB	µ×g-PCB	305.689	991.571	3.24372	1.69765	0.0134109
257919_at	MYB15 (MYB DOMAIN PROTEIN 15); DNA binding / transcription factor	MYB15	AT3G23250	1×g-PCB	µ×g-PCB	2416.08	7836.73	3.24357	1.69758	0.0217623
256756_at	ATPase E1-E2 type family protein / haloacid dehalogenase-like hydrolase family protein	AT3G25610	AT3G25610	1×g-PCB	µ×g-PCB	765.772	2483.2	3.24275	1.69722	0.0169319
251144_at	HXXXD-type acyl-transferase-like protein	AT5G01210	AT5G01210	1×g-PCB	µ×g-PCB	553.992	1795.94	3.24182	1.6968	0.0241984
263032_at	hypothetical protein	AT1G23850	AT1G23850	1×g-PCB	µ×g-PCB	303.611	983.315	3.23873	1.69543	0.00770404
255923_at	Sec14p-like phosphatidylinositol transfer family protein	AT1G22180	AT1G22180	1×g-PCB	µ×g-PCB	282.935	916.286	3.2385	1.69533	0.00762679
246486_at	NAD(P)-binding Rossmann-fold superfamily protein	AT5G15910	AT5G15910	1×g-PCB	µ×g-PCB	158.877	513.973	3.23504	1.69378	0.0143242
256989_at	AAA-type ATPase family protein	AT3G28580	AT3G28580	1×g-PCB	µ×g-PCB	39.4224	127.507	3.23438	1.69349	0.0408465
258167_at	UGT84A2; UDP-glycosyltransferase/ sinapate 1-glucosyltransferase	UGT84A2	AT3G21560	1×g-PCB	µ×g-PCB	126.803	409.496	3.22939	1.69126	0.00280102
261754_at	AMY2 (ALPHA-AMYLASE-LIKE 2); alpha-amylase/ calcium ion binding / catalytic/ cation binding	AMY2	AT1G76130	1×g-PCB	µ×g-PCB	241.406	779.546	3.2292	1.69117	0.0259087
258357_at	SRF7 (STRUBBELIG-RECEPTOR FAMILY 7); ATP binding / protein binding / protein kinase/ protein serine/threonine kinase/ protein tyrosine kinase	SRF7	AT3G14350	1×g-PCB	µ×g-PCB	291.208	940.228	3.22872	1.69096	0.00458606
258155_at	RACK1C_AT (RECEPTOR FOR ACTIVATED C KINASE 1 C); nucleotide binding	RACK1C_AT	AT3G18130	1×g-PCB	µ×g-PCB	294.324	949.743	3.22686	1.69013	0.0296347
263797_at	WRKY17; calmodulin binding / transcription factor	WRKY17	AT2G24570	1×g-PCB	µ×g-PCB	416.732	1343.29	3.22338	1.68857	0.000321681
264987_at	hypothetical protein	AT1G27030	AT1G27030	1×g-PCB	µ×g-PCB	488.048	1571.56	3.2201	1.68711	0.035641
254410_at	cysteine-rich receptor-like protein kinase 29	CRK29	AT4G21410	1×g-PCB	µ×g-PCB	190.855	613.826	3.21619	1.68535	0.0159231
263711_at	putative protein phosphatase 2C 20	PIA1	AT2G20630	1×g-PCB	µ×g-PCB	1793.66	5768.06	3.21581	1.68518	0.00372337
261037_at	"LOX3; electron carrier/ iron ion binding / lipoxygenase/ metal ion binding / oxidoreductase, acting on single donors with incorporation of molecular oxygen, incorporation of two atoms of oxygen"	LOX3	AT1G17420	1×g-PCB	µ×g-PCB	2704.43	8689.31	3.21299	1.68392	0.00933124
260267_at	"KCS6 (3-KETOACYL-COA SYNTHASE 6); catalytic/ transferase, transferring acyl groups other than amino-acyl groups"	KCS6	AT1G68530	1×g-PCB	µ×g-PCB	856.868	2752.47	3.21224	1.68358	0.0194548
252255_at	putative pectinesterase/pectinesterase inhibitor 34	AT3G49220	AT3G49220	1×g-PCB	µ×g-PCB	1188.2	3816.4	3.21191	1.68343	0.00891257
259279_at	MTO1 (METHIONINE OVERACCUMULATION 1); cystathionine gamma-synthase	MTO1	AT3G01120	1×g-PCB	µ×g-PCB	1262.52	4054.45	3.2114	1.6832	0.00124964
246157_at	NADH-cytochrome b5 reductase-like protein	AT5G20080	AT5G20080	1×g-PCB	µ×g-PCB	178.915	574.446	3.21072	1.6829	0.0162539
245701_at	GLU1 (GLUTAMATE SYNTHASE 1); glutamate synthase (ferredoxin)	GLU1	AT5G04140	1×g-PCB	µ×g-PCB	253.101	811.685	3.20696	1.68121	0.0259495
250149_at	Rossmann-fold NAD(P)-binding domain-containing protein	AT5G14700	AT5G14700	1×g-PCB	µ×g-PCB	1015.06	3253.5	3.20522	1.68043	0.0179866
265660_at	AtRLP21 (Receptor Like Protein 21); protein binding	AtRLP21	AT2G25470	1×g-PCB	µ×g-PCB	47.7348	152.926	3.20366	1.67972	0.0165266
250350_at	hypothetical protein	AT5G12010	AT5G12010	1×g-PCB	µ×g-PCB	1085.46	3476.96	3.20322	1.67952	0.0039301
249267_at	BTI3 (VIRB2-INTERACTING PROTEIN 3)	BTI3	AT5G41600	1×g-PCB	µ×g-PCB	1286.18	4113.12	3.19794	1.67714	0.00976815
267294_at	YCF37 (Arabidopsis homolog of Synechocystis YCF37)	YCF37	AT2G23670	1×g-PCB	µ×g-PCB	229.501	733.876	3.1977	1.67704	0.0252617
255011_at	CYTC-2 (cytochrome c-2); electron carrier/ heme binding / iron ion binding	CYTC-2	AT4G10040	1×g-PCB	µ×g-PCB	1365.91	4366.64	3.19687	1.67666	0.00197973
264020_at	translocon-associated protein subunit alpha	AT2G21160	AT2G21160	1×g-PCB	µ×g-PCB	862.579	2756.54	3.1957	1.67613	0.0012058
267428_at	coatomer subunit epsilon-2	AT2G34840	AT2G34840	1×g-PCB	µ×g-PCB	63.6469	203.295	3.19411	1.67541	7.5695e-05
265646_at	GDSL esterase/lipase	AT2G27360	AT2G27360	1×g-PCB	µ×g-PCB	80.3504	256.632	3.19392	1.67533	0.00889556
252888_at	APL3; glucose-1-phosphate adenylyltransferase	APL3	AT4G39210	1×g-PCB	µ×g-PCB	30.1076	96.1157	3.19241	1.67465	0.00704691
264331_at	carboxylate clamp-tetratricopeptide repeat protein	AT1G04130	AT1G04130	1×g-PCB	µ×g-PCB	101.396	323.517	3.19063	1.67384	0.0184804
253578_at	ATDGK7 (Diacylglycerol kinase 7); diacylglycerol kinase	ATDGK7	AT4G30340	1×g-PCB	µ×g-PCB	207.58	661.413	3.1863	1.67188	0.00201388
261017_at	"UGD1 (UDP-GLUCOSE DEHYDROGENASE 1); NAD or NADH binding / UDP-glucose 6-dehydrogenase/ binding / catalytic/ coenzyme binding / oxidoreductase/ oxidoreductase, acting on the CH-OH group of donors, NAD or NADP as acceptor"	UGD1	AT1G26570	1×g-PCB	µ×g-PCB	149.113	474.915	3.18494	1.67127	0.0421947
253357_at	"vacuolar import/degradation, Vid27-related protein"	AT4G33400	AT4G33400	1×g-PCB	µ×g-PCB	90.1959	286.792	3.17966	1.66887	0.040775
247964_at	PRF3 (PROFILIN 3); actin binding	PRF3	AT5G56600	1×g-PCB	µ×g-PCB	108.157	343.895	3.17959	1.66884	0.0289665
251780_s_at	Rossmann-fold NAD(P)-binding domain-containing protein /// Rossmann-fold NAD(P)-binding domain-containing protein	AT3G55290 /// AT3G55310	AT3G55290 /// AT3G55310	1×g-PCB	µ×g-PCB	326.574	1038.13	3.17885	1.6685	0.0368063
247937_at	"ACA8 (AUTOINHIBITED CA2+ -ATPASE, ISOFORM 8); calcium-transporting ATPase/ calmodulin binding / protein self-association"	ACA8	AT5G57110	1×g-PCB	µ×g-PCB	484.129	1538.66	3.17821	1.66821	0.0326854
259220_at	RING-H2 finger protein ATL51	AT3G03550	AT3G03550	1×g-PCB	µ×g-PCB	118.063	374.787	3.17446	1.66651	0.0110434
258984_at	ATERDJ3A; oxidoreductase	ATERDJ3A	AT3G08970	1×g-PCB	µ×g-PCB	84.6899	268.698	3.17272	1.66572	0.00106145
251176_at	putative calcium-transporting ATPase 12	AT3G63380	AT3G63380	1×g-PCB	µ×g-PCB	97.7088	309.742	3.17005	1.66451	0.0166425
245324_at	lactate/malate dehydrogenase family protein	AT4G17260	AT4G17260	1×g-PCB	µ×g-PCB	157.886	500.411	3.16945	1.66423	0.00161767
247044_at	MAPKKK5; ATP binding / kinase/ protein kinase/ protein serine/threonine kinase	MAPKKK5	AT5G66850	1×g-PCB	µ×g-PCB	219.718	696.375	3.16941	1.66421	0.00295281
251234_s_at	UXS4 (UDP-XYLOSE SYNTHASE 4); UDP-glucuronate decarboxylase/ catalytic	UXS4	AT2G47650 /// AT3G62830	1×g-PCB	µ×g-PCB	417.46	1319.28	3.16024	1.66004	0.00250245
254247_at	cysteine-rich receptor-like protein kinase 18	CRK18	AT4G23260	1×g-PCB	µ×g-PCB	58.7167	185.531	3.15977	1.65982	0.00315885
265679_at	hypothetical protein /// hypothetical protein	AT2G32235 /// AT2G32240	AT2G32235 /// AT2G32240	1×g-PCB	µ×g-PCB	2141.38	6763.13	3.15831	1.65915	0.0050805
245904_at	ATSPS2F (SUCROSE PHOSPHATE SYNTHASE 2F); sucrose-phosphate synthase	ATSPS2F	AT5G11110	1×g-PCB	µ×g-PCB	163.21	515.435	3.1581	1.65906	0.0108871
256905_at	HSP60 (HEAT SHOCK PROTEIN 60); ATP binding	HSP60	AT3G23990	1×g-PCB	µ×g-PCB	383.66	1208.13	3.14895	1.65487	0.00591616
247864_s_at	ASB1 (ANTHRANILATE SYNTHASE BETA SUBUNIT 1); anthranilate synthase	ASB1	AT1G24807 /// AT1G24909 /// AT1G25083 /// AT1G25155 /// AT1G25220 /// AT5G57890	1×g-PCB	µ×g-PCB	1091.84	3435.35	3.14638	1.6537	0.0181809
250556_at	DGK1 (DIACYLGLYCEROL KINASE1); calcium ion binding / diacylglycerol kinase	DGK1	AT5G07920	1×g-PCB	µ×g-PCB	1229.65	3867.86	3.1455	1.65329	0.00505035
259852_at	"AERO1 (Arabidopsis endoplasmic reticulum oxidoreductins 1); FAD binding / electron carrier/ oxidoreductase, acting on sulfur group of donors, disulfide as acceptor / protein binding"	AERO1	AT1G72280	1×g-PCB	µ×g-PCB	267.091	839.622	3.14358	1.65241	0.000103455
253609_at	"AHA2; ATPase/ hydrogen-exporting ATPase, phosphorylative mechanism"	AHA2	AT4G30190	1×g-PCB	µ×g-PCB	970.494	3043.97	3.13652	1.64916	0.00280421
262496_at	"TRAM, LAG1 and CLN8 (TLC) lipid-sensing domain containing protein"	AT1G21790	AT1G21790	1×g-PCB	µ×g-PCB	180.902	567.374	3.13636	1.64909	0.0053185
253496_at	ATGPX7 (glutathione peroxidase 7); glutathione peroxidase	ATGPX7	AT4G31870	1×g-PCB	µ×g-PCB	40.5481	127.143	3.13561	1.64874	0.0174127
248974_at	TIR-NBS-LRR class disease resistance protein	AT5G45060	AT5G45060	1×g-PCB	µ×g-PCB	108.55	340.014	3.13232	1.64723	0.000729161
263483_at	CR88; ATP binding	CR88	AT2G04030	1×g-PCB	µ×g-PCB	420.546	1314.56	3.12583	1.64424	0.00420216
264592_at	prolyl 4-hydroxylase 5	AT2G17720	AT2G17720	1×g-PCB	µ×g-PCB	558.564	1743.95	3.1222	1.64256	0.00701771
248154_at	S-adenosyl-L-methionine-dependent methyltransferase-like protein	AT5G54400	AT5G54400	1×g-PCB	µ×g-PCB	24.5443	76.5901	3.12049	1.64177	0.0134578
247982_at	ATSERAT1;1 (ARABIDOPSIS THALIANA SERINE ACETYLTRANSFERASE 1;1); serine O-acetyltransferase	ATSERAT1;1	AT5G56760	1×g-PCB	µ×g-PCB	1411.06	4401.41	3.11922	1.64118	0.00497535
266735_at	pectinacetylesterase-like protein	AT2G46930	AT2G46930	1×g-PCB	µ×g-PCB	111.193	346.376	3.11508	1.63927	0.031794
267212_at	"Late embryogenesis abundant protein, group 2"	AT2G44060	AT2G44060	1×g-PCB	µ×g-PCB	1105.92	3441.5	3.11189	1.63779	0.00433338
264150_at	FUS5 (FUSCA 5); MAP kinase kinase	FUS5	AT1G02090	1×g-PCB	µ×g-PCB	152.816	475.369	3.11072	1.63725	0.00117413
254964_at	HMG (high mobility group) box protein	AT4G11080	AT4G11080	1×g-PCB	µ×g-PCB	46.005	143.069	3.10986	1.63685	0.0406083
255683_at	NAD-dependent malic enzyme 2	NAD-ME2	AT4G00570	1×g-PCB	µ×g-PCB	345.897	1074.53	3.10651	1.63529	0.00396904
250492_at	ATXR5; DNA binding / protein binding	ATXR5	AT5G09790	1×g-PCB	µ×g-PCB	78.6262	244.186	3.10566	1.6349	0.00415523
250429_at	kinesin CDKA;1 associated 1	KAC1	AT5G10470	1×g-PCB	µ×g-PCB	178.997	555.613	3.10404	1.63415	0.0139346
248440_at	"HAD superfamily, subfamily IIIB acid phosphatase"	AT5G51260	AT5G51260	1×g-PCB	µ×g-PCB	224.251	695.366	3.10084	1.63266	0.00319798
247077_at	hypothetical protein	AT5G66420	AT5G66420	1×g-PCB	µ×g-PCB	162.498	503.326	3.09743	1.63107	0.00527448
262944_at	PGK (PHOSPHOGLYCERATE KINASE); phosphoglycerate kinase	PGK	AT1G79550	1×g-PCB	µ×g-PCB	1623.16	5027.08	3.09709	1.63091	0.000254127
261688_at	putative protein phosphatase 2C 12	AT1G47380	AT1G47380	1×g-PCB	µ×g-PCB	116.239	359.838	3.09567	1.63025	0.0256561
253063_at	ACA2 (CALCIUM ATPASE 2); calcium ion transmembrane transporter/ calcium-transporting ATPase/ calmodulin binding	ACA2	AT4G37640	1×g-PCB	µ×g-PCB	1575.89	4869.67	3.0901	1.62766	0.00276725
255319_at	AtRLP46 (Receptor Like Protein 46); kinase/ protein binding	AtRLP46	AT4G04220	1×g-PCB	µ×g-PCB	136.344	420.601	3.08484	1.6252	0.0149974
265204_at	hypothetical protein	AT2G36650	AT2G36650	1×g-PCB	µ×g-PCB	52.3852	161.562	3.08412	1.62486	0.0392804
265269_at	Magnesium transporter CorA-like family protein	AT2G42950	AT2G42950	1×g-PCB	µ×g-PCB	111.207	342.77	3.08226	1.62399	0.00055652
251114_at	trihelix transcription factor GT-3a	AT5G01380	AT5G01380	1×g-PCB	µ×g-PCB	165.863	511.057	3.0812	1.62349	0.00309822
261649_at	Syntaxin/t-SNARE family protein	AT1G27700	AT1G27700	1×g-PCB	µ×g-PCB	146.718	450.712	3.07196	1.61916	0.00160038
249366_at	glycerol-3-phosphate dehydrogenase [NAD+]	AT5G40610	AT5G40610	1×g-PCB	µ×g-PCB	126.123	387.24	3.07034	1.6184	0.0483847
266261_at	zinc finger A20 and AN1 domain-containing stress-associated protein 3	AT2G27580	AT2G27580	1×g-PCB	µ×g-PCB	428.698	1313.43	3.06377	1.61531	0.00042921
258397_at	hypothetical protein	AT3G15357	AT3G15357	1×g-PCB	µ×g-PCB	40.2347	123.263	3.0636	1.61523	0.00902429
255667_at	PLDBETA2; phospholipase D	PLDBETA2	AT4G00240	1×g-PCB	µ×g-PCB	28.0773	85.9695	3.06189	1.61442	0.0505392
262171_at	TIFY10B	TIFY10B	AT1G74950	1×g-PCB	µ×g-PCB	3021.3	9238.52	3.0578	1.61249	0.0146064
248191_at	calcium-binding endonuclease/exonuclease/phosphatase family protein	AT5G54130	AT5G54130	1×g-PCB	µ×g-PCB	112.049	342.551	3.05716	1.61219	0.0243248
250446_at	aspartyl protease family protein	AT5G10770	AT5G10770	1×g-PCB	µ×g-PCB	51.9362	158.738	3.0564	1.61183	0.0271737
245788_at	hypothetical protein	AT1G32120	AT1G32120	1×g-PCB	µ×g-PCB	123.371	377.008	3.0559	1.6116	0.00603903
267537_at	GK-1 (GUANYLATE KINASE 1); guanylate kinase	GK-1	AT2G41880	1×g-PCB	µ×g-PCB	312.715	954.825	3.05334	1.61039	0.00343162
251060_at	ATSR1 (ARABIDOPSIS THALIANA SERINE/THREONINE PROTEIN KINASE 1); ATP binding / kinase/ protein kinase/ protein serine/threonine kinase	ATSR1	AT5G01820	1×g-PCB	µ×g-PCB	181.697	554.701	3.05289	1.61018	0.0252759
255412_at	ABP1 (ENDOPLASMIC RETICULUM AUXIN BINDING PROTEIN 1); auxin binding	ABP1	AT4G02980	1×g-PCB	µ×g-PCB	110.352	336.869	3.05267	1.61007	0.0058579
258658_at	ADK1 (adenosine kinase 1); adenosine kinase/ copper ion binding	ADK1	AT3G09820	1×g-PCB	µ×g-PCB	926.715	2826.38	3.04989	1.60876	0.0291003
264433_at	"BGLU45 (BETA-GLUCOSIDASE 45); catalytic/ cation binding / hydrolase, hydrolyzing O-glycosyl compounds"	BGLU45	AT1G61810	1×g-PCB	µ×g-PCB	83.5232	254.657	3.04894	1.60831	0.039272
256144_at	RACK1B_AT (RECEPTOR FOR ACTIVATED C KINASE 1 B); nucleotide binding	RACK1B_AT	AT1G48630	1×g-PCB	µ×g-PCB	740.766	2256.35	3.04597	1.6069	0.00297392
252624_at	PSK1; growth factor	PSK1	AT3G44735	1×g-PCB	µ×g-PCB	845.623	2575.17	3.0453	1.60658	0.0440755
251763_at	MYB109 (myb domain protein 109); DNA binding / transcription factor	MYB109	AT3G55730	1×g-PCB	µ×g-PCB	109.136	331.905	3.04119	1.60464	0.00258578
258521_at	60S ribosomal protein L29-2	AT3G06680	AT3G06680	1×g-PCB	µ×g-PCB	525.532	1596.65	3.03816	1.6032	0.00605219
261639_at	TUA2; structural constituent of cytoskeleton	TUA2	AT1G50010	1×g-PCB	µ×g-PCB	1012.12	3073.25	3.03643	1.60238	0.0148837
245384_at	hydroxyproline-rich glycoprotein family protein	AT4G16790	AT4G16790	1×g-PCB	µ×g-PCB	96.8402	294.014	3.03608	1.60221	0.0108099
257264_at	Receptor-like protein kinase-related family protein	AT3G22060	AT3G22060	1×g-PCB	µ×g-PCB	442.201	1340.77	3.03203	1.60028	0.00179069
256229_at	MSL3 (MscS-LIKE 3); ion channel	MSL3	AT1G58200	1×g-PCB	µ×g-PCB	805.133	2440.73	3.03146	1.60001	0.0158491
263198_at	GLIP3; carboxylesterase/ lipase	GLIP3	AT1G53990	1×g-PCB	µ×g-PCB	16.8489	51.0608	3.03051	1.59956	0.0297275
258462_at	hypothetical protein	AT3G17350	AT3G17350	1×g-PCB	µ×g-PCB	54.941	166.467	3.02992	1.59928	0.0178666
265894_at	LTP; lipid binding	LTP	AT2G15050	1×g-PCB	µ×g-PCB	365.995	1107.98	3.02731	1.59804	0.0384061
251031_at	OHP (ONE HELIX PROTEIN)	OHP	AT5G02120	1×g-PCB	µ×g-PCB	410.18	1241.29	3.02622	1.59751	0.012478
251487_at	OASC (O-ACETYLSERINE (THIOL) LYASE ISOFORM C); ATP binding / cysteine synthase	OASC	AT3G59760	1×g-PCB	µ×g-PCB	166.333	503.294	3.02583	1.59733	0.00607844
256911_at	putative glucosamine-fructose-6-phosphate aminotransferase	AT3G24090	AT3G24090	1×g-PCB	µ×g-PCB	58.7992	177.672	3.02168	1.59535	0.00608347
262691_at	carboxylate clamp-tetratricopeptide repeat protein HOP2	AT1G62740	AT1G62740	1×g-PCB	µ×g-PCB	962.615	2904.55	3.01735	1.59328	0.00327642
247005_at	adenosine-5'-phosphosulfate kinase 4	APK4	AT5G67520	1×g-PCB	µ×g-PCB	78.3007	236.245	3.01715	1.59319	0.00149326
255587_at	AtPPa5 (Arabidopsis thaliana pyrophosphorylase 5); inorganic diphosphatase/ pyrophosphatase	AtPPa5	AT4G01480	1×g-PCB	µ×g-PCB	502.947	1516.47	3.01517	1.59224	0.0122427
266411_at	cyclophilin-like peptidyl-prolyl cis-trans isomerase family protein	AT2G38730	AT2G38730	1×g-PCB	µ×g-PCB	63.3931	191.042	3.01361	1.59149	0.00153605
266413_at	haloacid dehalogenase-like hydrolase family protein	AT2G38740	AT2G38740	1×g-PCB	µ×g-PCB	120.725	363.387	3.01003	1.58978	0.00296724
258849_at	UGP (UDP-glucose pyrophosphorylase); UTP:glucose-1-phosphate uridylyltransferase/ nucleotidyltransferase	UGP	AT3G03250	1×g-PCB	µ×g-PCB	449.391	1352.26	3.00909	1.58933	0.0471896
247313_at	"SAL1; 3'(2'),5'-bisphosphate nucleotidase/ inositol or phosphatidylinositol phosphatase"	SAL1	AT5G63980	1×g-PCB	µ×g-PCB	360.097	1083.45	3.00878	1.58918	0.0185782
263786_at	JAR1 (JASMONATE RESISTANT 1); ATP binding / adenylyltransferase/ catalytic/ jasmonate-amino synthetase	JAR1	AT2G46370	1×g-PCB	µ×g-PCB	1945.53	5849.23	3.0065	1.58808	0.0145139
248293_at	"hydrolase, alpha/beta fold family protein"	AT5G53050	AT5G53050	1×g-PCB	µ×g-PCB	1715.52	5153.55	3.00408	1.58692	0.00172413
259846_at	putative peptide/nitrate transporter	AT1G72140	AT1G72140	1×g-PCB	µ×g-PCB	63.5395	190.801	3.00287	1.58634	0.0173026
252977_at	phospholipase like protein (PEARLI 4)	AT4G38560	AT4G38560	1×g-PCB	µ×g-PCB	84.3771	253.125	2.99992	1.58492	0.0284039
262806_at	pyrophosphate--fructose 6-phosphate 1-phosphotransferase subunit alpha 1	AT1G20950	AT1G20950	1×g-PCB	µ×g-PCB	319.38	957.824	2.99901	1.58449	0.0306985
259884_at	U-box domain-containing protein 43	AT1G76390	AT1G76390	1×g-PCB	µ×g-PCB	589.751	1766.5	2.99533	1.58271	0.00278786
255798_at	Haloacid dehalogenase-like hydrolase	AT2G33255	AT2G33255	1×g-PCB	µ×g-PCB	84.4575	252.929	2.99474	1.58243	0.0378013
255503_at	L-type lectin-domain containing receptor kinase IV.4	AT4G02420	AT4G02420	1×g-PCB	µ×g-PCB	88.6254	265.334	2.99389	1.58202	0.00778183
262762_at	ribose-phosphate pyrophosphokinase 3	PRS3	AT1G10700	1×g-PCB	µ×g-PCB	235.734	704.579	2.98887	1.5796	0.0307797
247933_at	hypothetical protein	AT5G56980	AT5G56980	1×g-PCB	µ×g-PCB	1909.66	5703.96	2.98689	1.57865	0.0107195
250072_at	hypothetical protein	AT5G17210	AT5G17210	1×g-PCB	µ×g-PCB	167.855	501.364	2.98689	1.57864	0.0130041
264201_at	hypothetical protein	AT1G22630	AT1G22630	1×g-PCB	µ×g-PCB	38.9583	116.075	2.97948	1.57506	0.0500353
245936_at	"hydrolase, alpha/beta fold family protein"	AT5G19850	AT5G19850	1×g-PCB	µ×g-PCB	145.758	434.228	2.97911	1.57488	0.00449103
247075_at	PLP3b (Phosducin-like protein 3 homolog); beta-tubulin binding	PLP3b	AT5G66410	1×g-PCB	µ×g-PCB	115.928	345.289	2.97849	1.57458	0.0257902
262548_at	AGO2 (argonaute 2); nucleic acid binding	AGO2	AT1G31280	1×g-PCB	µ×g-PCB	94.2346	280.565	2.97731	1.57401	0.0105104
253165_at	hypothetical protein	AT4G35320	AT4G35320	1×g-PCB	µ×g-PCB	224.713	668.535	2.97506	1.57292	0.0310625
254708_at	UBP20 (UBIQUITIN-SPECIFIC PROTEASE 20); ubiquitin thiolesterase/ ubiquitin-specific protease	UBP20	AT4G17895	1×g-PCB	µ×g-PCB	205.306	610.554	2.97387	1.57234	0.00341361
244919_at	unknown protein	CCB203	AT2G07768 /// ATMG00960	1×g-PCB	µ×g-PCB	41.1845	122.466	2.97361	1.57221	0.0154648
254709_at	AGD8 (ARF-GAP DOMAIN 8); ARF GTPase activator/ DNA binding / zinc ion binding	AGD8	AT4G17890	1×g-PCB	µ×g-PCB	342.649	1018.21	2.9716	1.57124	0.0046795
249410_at	cysteine-rich receptor-like protein kinase 42	CRK42	AT5G40380	1×g-PCB	µ×g-PCB	99.1489	294.55	2.97079	1.57084	0.0506407
256150_at	"ATFRUCT5 (BETA-FRUCTOFURANOSIDASE 5); hydrolase, hydrolyzing O-glycosyl compounds / levanase"	ATFRUCT5	AT1G55120	1×g-PCB	µ×g-PCB	288.431	856.679	2.97013	1.57053	0.00644608
248393_at	ATBAG1 (ARABIDOPSIS THALIANA BCL-2-ASSOCIATED ATHANOGENE 1); protein binding	ATBAG1	AT5G52060	1×g-PCB	µ×g-PCB	815.094	2418.42	2.96704	1.56902	0.00179871
260993_at	FMO GS-OX5 (FLAVIN-MONOOXYGENASE GLUCOSINOLATE S-OXYGENASE 5); 8-methylthiopropyl glucosinolate S-oxygenase/ flavin-containing monooxygenase/ monooxygenase	FMO GS-OX5	AT1G12140	1×g-PCB	µ×g-PCB	268.639	795.394	2.96083	1.566	0.0082411
261031_at	hypothetical protein	AT1G17360	AT1G17360	1×g-PCB	µ×g-PCB	335.643	992.925	2.95828	1.56476	0.0233494
247010_at	60S ribosomal protein L26-2	AT5G67510	AT5G67510	1×g-PCB	µ×g-PCB	1006.01	2976.03	2.95826	1.56475	0.000698853
245375_at	protein kinase family protein	AT4G17660	AT4G17660	1×g-PCB	µ×g-PCB	78.7709	232.977	2.95765	1.56445	0.0208125
265154_at	GTP-binding family protein	AT1G30960	AT1G30960	1×g-PCB	µ×g-PCB	27.047	79.8446	2.95207	1.56173	0.0208303
253790_at	PSB28 (PHOTOSYSTEM II REACTION CENTER PSB28 PROTEIN)	PSB28	AT4G28660	1×g-PCB	µ×g-PCB	105.558	311.339	2.94946	1.56045	0.0401189
253883_at	hypothetical protein	AT4G27660	AT4G27660	1×g-PCB	µ×g-PCB	85.5404	252.291	2.94937	1.56041	0.0322691
258379_at	putative fumarylacetoacetate hydrolase	AT3G16700	AT3G16700	1×g-PCB	µ×g-PCB	52.3589	154.252	2.94605	1.55878	0.0104487
259629_at	WRR4 (WHITE RUST RESISTANCE 4); ATP binding / nucleoside-triphosphatase/ nucleotide binding / transmembrane receptor	WRR4	AT1G56510	1×g-PCB	µ×g-PCB	445.088	1311.21	2.94594	1.55873	0.0060875
247318_at	putative SAL3 phosphatase	AT5G63990	AT5G63990	1×g-PCB	µ×g-PCB	56.0658	165.145	2.94556	1.55854	0.00543202
244903_at	hypothetical protein	ArthMp059	ATMG00660	1×g-PCB	µ×g-PCB	336.419	990.928	2.94552	1.55852	0.0177923
256835_at	APS1 (ATP SULFURYLASE 1); sulfate adenylyltransferase (ATP)	APS1	AT3G22890	1×g-PCB	µ×g-PCB	3707.74	10918.2	2.9447	1.55812	0.00539028
254442_at	galactosyltransferase family protein	AT4G21060	AT4G21060	1×g-PCB	µ×g-PCB	105.352	309.988	2.9424	1.55699	0.0313853
258894_at	AtRLP32 (Receptor Like Protein 32); kinase/ protein binding	AtRLP32	AT3G05650	1×g-PCB	µ×g-PCB	342.302	1006.72	2.94102	1.55632	0.0147508
249919_at	GPI-anchored glycoprotein membrane precursor	AT5G19250	AT5G19250	1×g-PCB	µ×g-PCB	1579.56	4643.67	2.93984	1.55574	0.00405511
257801_at	WNK6 (WITH NO K (=LYSINE) 6); kinase/ protein kinase	WNK6	AT3G18750	1×g-PCB	µ×g-PCB	19.2166	56.4186	2.93593	1.55382	0.0346866
248129_at	RabGAP/TBC domain-containing protein	AT5G54780	AT5G54780	1×g-PCB	µ×g-PCB	68.7625	201.765	2.93423	1.55298	0.011148
262637_at	2-oxoglutarate-dependent dioxygenase-like protein	AT1G06640	AT1G06640	1×g-PCB	µ×g-PCB	1073.01	3147.22	2.93306	1.55241	0.0142771
258100_at	MATE efflux family protein LAL5	AT3G23550	AT3G23550	1×g-PCB	µ×g-PCB	223.959	656.436	2.93105	1.55142	0.00065513
252619_at	hypothetical protein	AT3G45210	AT3G45210	1×g-PCB	µ×g-PCB	118.936	347.589	2.92249	1.5472	0.0446589
245218_s_at	putative disease resistance protein RDL6/RF9 /// putative disease resistance protein RDL6/RF9	AT1G58848 /// AT1G59218	AT1G58848 /// AT1G59218	1×g-PCB	µ×g-PCB	686.24	2003.35	2.91932	1.54563	0.00327812
257311_at	PHT2;1 (PHOSPHATE TRANSPORTER 2;1); low affinity phosphate transmembrane transporter	PHT2;1	AT3G26570	1×g-PCB	µ×g-PCB	816.682	2383.69	2.91875	1.54535	0.00849633
250978_at	lipid phosphate phosphatase gamma	AT5G03080	AT5G03080	1×g-PCB	µ×g-PCB	345.553	1008.57	2.91872	1.54534	0.00308124
255818_at	hypothetical protein	AT2G33570	AT2G33570	1×g-PCB	µ×g-PCB	138.45	403.879	2.91715	1.54456	0.0274249
248942_at	hypothetical protein	AT5G45480	AT5G45480	1×g-PCB	µ×g-PCB	311.742	908.931	2.91565	1.54382	0.00496339
264652_at	sugar transporter ERD6-like 3	ESL1	AT1G08920	1×g-PCB	µ×g-PCB	763.245	2225.27	2.91554	1.54377	0.0283455
263404_s_at	MATE efflux family protein /// MATE efflux family protein	AT2G04090 /// AT2G04100	AT2G04090 /// AT2G04100	1×g-PCB	µ×g-PCB	84.7324	246.783	2.9125	1.54226	0.0129289
245249_at	ACX1 (ACYL-COA OXIDASE 1); acyl-CoA oxidase	ACX1	AT4G16760	1×g-PCB	µ×g-PCB	3114.43	9070.57	2.91244	1.54223	0.00854558
248781_at	hypothetical protein	AT5G47870	AT5G47870	1×g-PCB	µ×g-PCB	162.634	473.419	2.91095	1.54149	0.0185537
265210_at	RPL24A (ribosomal protein L24); structural constituent of ribosome	RPL24A	AT2G36620	1×g-PCB	µ×g-PCB	830.434	2416.1	2.90944	1.54074	0.0078116
249636_at	"BGLU42 (BETA GLUCOSIDASE 42); beta-glucosidase/ catalytic/ cation binding / hydrolase, hydrolyzing O-glycosyl compounds"	BGLU42	AT5G36890	1×g-PCB	µ×g-PCB	98.7361	287.12	2.90796	1.54001	0.00586343
265480_at	COR413-PM1	COR413-PM1	AT2G15970	1×g-PCB	µ×g-PCB	3773.7	10973.1	2.90778	1.53992	0.00879352
257035_at	CYP707A4; (+)-abscisic acid 8'-hydroxylase/ oxygen binding	CYP707A4	AT3G19270	1×g-PCB	µ×g-PCB	20.0485	58.2828	2.90709	1.53958	0.032011
260259_at	alpha/beta-Hydrolases superfamily protein	AT1G74300	AT1G74300	1×g-PCB	µ×g-PCB	66.1222	192.208	2.90686	1.53946	0.00545253
249968_at	SNARE associated Golgi family protein	AT5G19070	AT5G19070	1×g-PCB	µ×g-PCB	381.039	1107.33	2.90608	1.53907	0.00440984
265093_at	ABC transporter I family member 19	AT1G03905	AT1G03905	1×g-PCB	µ×g-PCB	95.2116	276.494	2.904	1.53804	0.000731716
244958_at	hypothetical protein	ArthMp038	ATMG00450	1×g-PCB	µ×g-PCB	30.0567	87.2333	2.9023	1.53719	0.0304121
253038_at	HAT22; transcription factor	HAT22	AT4G37790	1×g-PCB	µ×g-PCB	1147.18	3325.73	2.89906	1.53558	0.0280959
249208_at	AOS (ALLENE OXIDE SYNTHASE); allene oxide synthase/ hydro-lyase/ oxygen binding	AOS	AT5G42650	1×g-PCB	µ×g-PCB	3551.65	10289.2	2.89702	1.53457	0.00651532
265691_at	hypothetical protein	AT2G24330	AT2G24330	1×g-PCB	µ×g-PCB	605.636	1753.76	2.89574	1.53393	0.0255695
256968_at	NADK1 (NAD KINASE 1); NAD+ kinase/ NADH kinase/ calmodulin binding	NADK1	AT3G21070	1×g-PCB	µ×g-PCB	401.069	1161.06	2.89492	1.53352	0.0116285
259708_at	alpha/beta-hydrolase-like protein	AT1G77420	AT1G77420	1×g-PCB	µ×g-PCB	235.959	682.046	2.89053	1.53133	0.0231723
254629_at	hypothetical protein	AT4G18425	AT4G18425	1×g-PCB	µ×g-PCB	23.3326	67.3524	2.88663	1.52938	0.0254265
258890_at	"NF-YA2 (NUCLEAR FACTOR Y, SUBUNIT A2); transcription factor"	NF-YA2	AT3G05690	1×g-PCB	µ×g-PCB	244.999	707.038	2.88588	1.52901	0.0173987
249786_at	ABIL3 (ABL INTERACTOR-LIKE PROTEIN 3)	ABIL3	AT5G24310	1×g-PCB	µ×g-PCB	107.406	309.867	2.88502	1.52858	0.0287796
253919_at	hypothetical protein	AT4G27350	AT4G27350	1×g-PCB	µ×g-PCB	378.342	1090.02	2.88105	1.5266	0.00358893
263156_at	protein MODIFIED VACUOLE PHENOTYPE 1	MVP1	AT1G54030	1×g-PCB	µ×g-PCB	457.09	1315.45	2.87787	1.525	0.00967382
259875_s_at	OPR1; 12-oxophytodienoate reductase	OPR1	AT1G76680 /// AT1G76690	1×g-PCB	µ×g-PCB	3407.57	9804.9	2.87739	1.52476	0.00258972
265899_s_at	ASK4 (ARABIDOPSIS SKP1-LIKE 4); protein binding / ubiquitin-protein ligase	ASK4	AT1G20140 /// AT2G25700	1×g-PCB	µ×g-PCB	77.826	223.612	2.87323	1.52267	0.00251846
254161_at	hypothetical protein	AT4G24370	AT4G24370	1×g-PCB	µ×g-PCB	673.996	1932.91	2.86784	1.51997	0.0226068
246954_at	Nuclear transport factor 2 (NTF2) family protein	AT5G04830	AT5G04830	1×g-PCB	µ×g-PCB	1081.83	3102.49	2.86781	1.51995	0.00182564
259671_at	proline-rich receptor-like protein kinase PERK15	AT1G52290	AT1G52290	1×g-PCB	µ×g-PCB	125.631	359.99	2.86545	1.51876	0.0102135
258901_at	putative protein phosphatase 2C	AT3G05640	AT3G05640	1×g-PCB	µ×g-PCB	258.131	739.292	2.86402	1.51804	0.010333
257694_at	NOP56-like pre RNA processing ribonucleoprotein	AT3G12860	AT3G12860	1×g-PCB	µ×g-PCB	38.5001	110.247	2.86354	1.5178	0.0490649
263111_s_at	Protein kinase superfamily protein /// probable inactive receptor-like protein kinase	AT1G65190 /// AT1G65250	AT1G65190 /// AT1G65250	1×g-PCB	µ×g-PCB	342.513	979.82	2.86068	1.51636	0.0372905
261692_at	CRT3 (CALRETICULIN 3); calcium ion binding / unfolded protein binding	CRT3	AT1G08450	1×g-PCB	µ×g-PCB	900.234	2570.76	2.85566	1.51382	0.0310603
261149_s_at	DHAR1 (dehydroascorbate reductase); copper ion binding / glutathione dehydrogenase (ascorbate)	DHAR1	AT1G19550 /// AT1G19570	1×g-PCB	µ×g-PCB	5907.07	16822	2.84778	1.50984	0.0124184
266958_at	"geranyl diphosphate synthase, putative / GPPS, putative / dimethylallyltransferase, putative / prenyl transferase, putative"	GPS1	AT2G34630	1×g-PCB	µ×g-PCB	328.456	934.954	2.84651	1.5092	0.00150771
261832_at	putative S-ribonuclease binding protein SBP1	AT1G10650	AT1G10650	1×g-PCB	µ×g-PCB	644.752	1834.24	2.84488	1.50837	0.00238853
258834_at	GTP cyclohydrolase I	AT3G07270	AT3G07270	1×g-PCB	µ×g-PCB	483.899	1376.21	2.84399	1.50792	0.00352594
254652_at	WRKY28; transcription factor	WRKY28	AT4G18170	1×g-PCB	µ×g-PCB	598.182	1700.5	2.84278	1.5073	0.0094293
245635_at	AtIDD16 (Arabidopsis thaliana Indeterminate(ID)-Domain 16); nucleic acid binding / transcription factor/ zinc ion binding	AtIDD16	AT1G25250	1×g-PCB	µ×g-PCB	98.0809	278.757	2.84211	1.50696	0.00917515
247200_at	hypothetical protein	AT5G65120	AT5G65120	1×g-PCB	µ×g-PCB	38.2441	108.639	2.84069	1.50624	0.0104328
249798_at	WD repeat-containing protein RUP2	AT5G23730	AT5G23730	1×g-PCB	µ×g-PCB	149.593	424.893	2.84034	1.50606	0.0140614
249123_at	KCS20 (3-KETOACYL-COA SYNTHASE 20); fatty acid elongase	KCS20	AT5G43760	1×g-PCB	µ×g-PCB	1198.12	3402.38	2.83976	1.50577	0.034381
253875_at	early nodulin-like protein 2	ENODL2	AT4G27520	1×g-PCB	µ×g-PCB	1726.93	4900.43	2.83766	1.5047	0.027916
250644_at	putative protein phosphatase 2C	AT5G06750	AT5G06750	1×g-PCB	µ×g-PCB	426.955	1209.62	2.83314	1.5024	0.0011849
249701_at	hypothetical protein	AT5G35460	AT5G35460	1×g-PCB	µ×g-PCB	861.621	2437.85	2.82938	1.50049	0.0008139
262188_at	"beta-1,3-galactosyltransferase 7"	AT1G77810	AT1G77810	1×g-PCB	µ×g-PCB	183.468	518.361	2.82536	1.49843	0.011952
257600_at	CLE41 (CLAVATA3/ESR-RELATED 41); protein binding / receptor binding	CLE41	AT3G24770	1×g-PCB	µ×g-PCB	297.651	840.725	2.82454	1.49801	0.0180437
261191_at	granule-bound starch synthase 1	AT1G32900	AT1G32900	1×g-PCB	µ×g-PCB	306.095	863.605	2.82136	1.49639	0.0509424
254415_at	ATSBT3.12 (SUBTILASE 3.12); identical protein binding / serine-type endopeptidase	ATSBT3.12	AT4G21326	1×g-PCB	µ×g-PCB	75.1237	211.571	2.81631	1.4938	0.0221309
249165_at	ATIPK1 (Inositol-pentakisphosphate 2-kinase 1); inositol pentakisphosphate 2-kinase/ inositol tetrakisphosphate 2-kinase	ATIPK1	AT5G42810	1×g-PCB	µ×g-PCB	201.922	568.219	2.81405	1.49265	0.0116599
259248_at	HEAT SHOCK PROTEIN 89.1	Hsp89.1	AT3G07770	1×g-PCB	µ×g-PCB	303.398	853.522	2.81321	1.49222	0.00435237
255880_at	hypothetical protein	AT1G67060	AT1G67060	1×g-PCB	µ×g-PCB	261.616	735.788	2.81247	1.49184	0.0107759
256597_at	60S acidic ribosomal protein P2-3	AT3G28500	AT3G28500	1×g-PCB	µ×g-PCB	283.305	796.706	2.81218	1.49169	0.0240804
256363_at	AAR2 protein family	AT1G66510	AT1G66510	1×g-PCB	µ×g-PCB	84.8809	238.531	2.81018	1.49066	0.0228652
258623_at	hypothetical protein	AT3G02790	AT3G02790	1×g-PCB	µ×g-PCB	208.352	585.304	2.8092	1.49016	0.0034575
259098_at	ribose 5-phosphate isomerase A	AT3G04790	AT3G04790	1×g-PCB	µ×g-PCB	808.319	2270.14	2.80847	1.48979	0.0236094
252234_at	ATPSK4 (PHYTOSULFOKINE 4 PRECURSOR); growth factor	ATPSK4	AT3G49780	1×g-PCB	µ×g-PCB	1587.39	4453.88	2.80579	1.48841	0.0125463
260214_at	F-box/kelch-repeat protein	AT1G74510	AT1G74510	1×g-PCB	µ×g-PCB	52.4375	146.945	2.8023	1.48661	0.00239723
245078_at	ERF/AP2 transcription factor DEAR3	DEAR3	AT2G23340	1×g-PCB	µ×g-PCB	228.819	640.781	2.80038	1.48562	0.00554923
257325_at	NADH dehydrogenase subunit 1	nad1	AT2G07798 /// ATMG01220	1×g-PCB	µ×g-PCB	93.1502	260.687	2.79856	1.48469	0.0309465
254806_at	probable trehalose-phosphate phosphatase F /// uncharacerized protein	AT4G12430 /// CPuORF26	AT4G12430 /// AT4G12432	1×g-PCB	µ×g-PCB	108.957	304.44	2.79414	1.4824	0.0132701
254869_at	receptor-like cytosolic kinase ARCK1	AT4G11890	AT4G11890	1×g-PCB	µ×g-PCB	298.768	834.287	2.79242	1.48152	0.0129514
246288_at	putative methyltransferase PMT20	AT1G31850	AT1G31850	1×g-PCB	µ×g-PCB	251.224	701.523	2.79242	1.48152	0.0174778
266100_at	O-fucosyltransferase family protein	AT2G37980	AT2G37980	1×g-PCB	µ×g-PCB	56.5307	157.854	2.79235	1.48148	0.00655733
255872_at	SIP4 (SOS3-INTERACTING PROTEIN 4); kinase/ protein kinase	SIP4	AT2G30360	1×g-PCB	µ×g-PCB	1364.46	3806.33	2.78963	1.48007	0.0183611
252381_s_at	"ABCA4 (ATP BINDING CASSETTE SUBFAMILY A4); ATPase, coupled to transmembrane movement of substances / transporter"	ABCA4	AT3G47750 /// AT3G47760	1×g-PCB	µ×g-PCB	44.9682	125.419	2.78905	1.47978	0.0340266
259410_at	Regulator of Vps4 activity in the MVB pathway protein	AT1G13340	AT1G13340	1×g-PCB	µ×g-PCB	466.49	1298.7	2.78399	1.47715	0.0315904
245292_at	extradiol ring-cleavage dioxygenase	AT4G15093	AT4G15093	1×g-PCB	µ×g-PCB	259.51	722.364	2.78357	1.47693	0.00780974
254343_at	APR3 (APS REDUCTASE 3); adenylyl-sulfate reductase	APR3	AT4G21990	1×g-PCB	µ×g-PCB	521.328	1450.83	2.78295	1.47662	0.0261673
254223_at	galactose mutarotase-like superfamily protein	AT4G23730	AT4G23730	1×g-PCB	µ×g-PCB	595.823	1657.39	2.78169	1.47596	0.0200903
252060_at	PAD4 (PHYTOALEXIN DEFICIENT 4); lipase/ protein binding / triacylglycerol lipase	PAD4	AT3G52430	1×g-PCB	µ×g-PCB	199.687	554.475	2.77672	1.47338	0.0172192
266296_at	ATGSTU7 (ARABIDOPSIS THALIANA GLUTATHIONE S-TRANSFERASE TAU 7); glutathione transferase	ATGSTU7	AT2G29420	1×g-PCB	µ×g-PCB	1178.27	3271.64	2.77664	1.47334	0.0187791
245993_at	hypothetical protein	AT5G20700	AT5G20700	1×g-PCB	µ×g-PCB	261.323	725.49	2.77622	1.47312	0.00600107
248496_at	bidirectional sugar transporter SWEET10	AT5G50790	AT5G50790	1×g-PCB	µ×g-PCB	13.0476	36.214	2.77553	1.47277	0.0366899
253100_at	CYP81F3; electron carrier/ heme binding / iron ion binding / monooxygenase/ oxygen binding	CYP81F3	AT4G37400	1×g-PCB	µ×g-PCB	45.7134	126.866	2.77524	1.47261	0.0355558
251638_at	40S ribosomal protein S2-4	AT3G57490	AT3G57490	1×g-PCB	µ×g-PCB	277.29	768.874	2.77281	1.47135	0.00888912
254108_at	RIN2 (RPM1 INTERACTING PROTEIN 2); protein binding / ubiquitin-protein ligase/ zinc ion binding	RIN2	AT4G25230	1×g-PCB	µ×g-PCB	408.639	1132.99	2.7726	1.47124	0.00518408
264609_at	carboxylate clamp-tetratricopeptide repeat protein	AT1G04530	AT1G04530	1×g-PCB	µ×g-PCB	534.368	1481.24	2.77195	1.4709	0.00192814
248294_at	RNA-binding KH domain-containing protein	AT5G53060	AT5G53060	1×g-PCB	µ×g-PCB	247.957	687.213	2.7715	1.47067	0.000598893
255462_at	"oxidoreductase, 2OG-Fe(II) oxygenase family protein"	AT4G02940	AT4G02940	1×g-PCB	µ×g-PCB	426.854	1182.93	2.77128	1.47055	0.015046
260466_at	1-phosphatidylinositol-4-phosphate 5-kinase	AT1G10900	AT1G10900	1×g-PCB	µ×g-PCB	70.2576	194.623	2.77013	1.46995	0.00118319
249464_at	EMB2745 (EMBRYO DEFECTIVE 2745)	EMB2745	AT5G39710	1×g-PCB	µ×g-PCB	69.6566	192.935	2.7698	1.46978	0.00971729
249747_at	hypothetical protein	AT5G24600	AT5G24600	1×g-PCB	µ×g-PCB	343.171	950.267	2.76908	1.46941	0.0457514
263049_at	alpha/beta-Hydrolases superfamily protein	AT2G05260	AT2G05260	1×g-PCB	µ×g-PCB	224.48	621.172	2.76715	1.4684	0.00397669
254158_at	hypothetical protein	AT4G24380	AT4G24380	1×g-PCB	µ×g-PCB	3956.59	10947.8	2.76698	1.46831	0.0213403
246700_at	bifunctional cystathionine gamma-lyase/cysteine synthase	DES1	AT5G28030	1×g-PCB	µ×g-PCB	33.1082	91.5012	2.7637	1.4666	0.0372058
258652_at	ATRABC2B (ARABIDOPSIS RAB GTPASE HOMOLOG C2B); ATP binding / GTP binding / transcription factor binding	ATRABC2B	AT3G09910	1×g-PCB	µ×g-PCB	74.1837	204.968	2.76298	1.46623	0.035237
253066_at	ACS8; 1-aminocyclopropane-1-carboxylate synthase	ACS8	AT4G37770	1×g-PCB	µ×g-PCB	77.4803	213.814	2.75959	1.46446	0.0196514
248088_at	dihydrolipoyllysine-residue succinyltransferase component of 2-oxoglutarate dehydrogenase complex 1	AT5G55070	AT5G55070	1×g-PCB	µ×g-PCB	841.654	2320.31	2.75684	1.46302	0.000456378
265670_s_at	hypothetical protein /// hypothetical protein	AT2G32190 /// AT2G32210	AT2G32190 /// AT2G32210	1×g-PCB	µ×g-PCB	1462.58	4031.75	2.7566	1.46289	0.00175639
248309_at	hypothetical protein	AT5G52540	AT5G52540	1×g-PCB	µ×g-PCB	106.581	293.705	2.7557	1.46242	0.00558145
258389_at	SDE5 (silencing defective 5)	SDE5	AT3G15390	1×g-PCB	µ×g-PCB	14.3416	39.5149	2.75527	1.46219	0.0296342
259077_s_at	RGP1 (REVERSIBLY GLYCOSYLATED POLYPEPTIDE 1); cellulose synthase (UDP-forming)	RGP1	AT3G02230 /// AT5G15650	1×g-PCB	µ×g-PCB	4696.94	12924.2	2.75161	1.46028	0.00188076
260943_at	"ATTRX5; oxidoreductase, acting on sulfur group of donors, disulfide as acceptor"	ATTRX5	AT1G45145	1×g-PCB	µ×g-PCB	5328.39	14652.7	2.74993	1.4594	0.0131992
250264_at	UDP-glycosyltransferase 92A1	AT5G12890	AT5G12890	1×g-PCB	µ×g-PCB	471.537	1295.43	2.74726	1.45799	0.00545245
253551_at	hypothetical protein	AT4G30996	AT4G30996	1×g-PCB	µ×g-PCB	771.342	2118.76	2.74686	1.45778	0.0272447
255364_s_at	FIB (FIBRILLIN); structural molecule	FIB	AT4G04020 /// AT4G22240	1×g-PCB	µ×g-PCB	1335.59	3662.28	2.74208	1.45527	0.00736867
255627_at	hypothetical protein	AT4G00955	AT4G00955	1×g-PCB	µ×g-PCB	69.2283	189.693	2.7401	1.45423	0.00333253
265187_at	ATARF1 (ADP-RIBOSYLATION FACTOR 1); GTP binding / phospholipase activator/ protein binding	ATARF1	AT1G23490	1×g-PCB	µ×g-PCB	3776.47	10347.7	2.74005	1.4542	0.00769196
267336_at	heat shock protein	AT2G19310	AT2G19310	1×g-PCB	µ×g-PCB	650.738	1781.88	2.73825	1.45325	0.00132062
250246_at	ATPAO1 (ARABIDOPSIS THALIANA POLYAMINE OXIDASE 1); FAD binding / polyamine oxidase	ATPAO1	AT5G13700	1×g-PCB	µ×g-PCB	112.718	308.604	2.73784	1.45304	0.00704853
258996_at	ribosome recycling factor	AT3G01800	AT3G01800	1×g-PCB	µ×g-PCB	168.279	460.721	2.73784	1.45304	0.000469049
245854_at	AAC2 (ADP/ATP carrier 2); ATP:ADP antiporter/ binding	AAC2	AT5G13490	1×g-PCB	µ×g-PCB	444.169	1215.54	2.73665	1.45241	0.00351329
257724_at	hypothetical protein	AT3G18510	AT3G18510	1×g-PCB	µ×g-PCB	27.0618	74.0242	2.73538	1.45174	0.00474378
264579_at	hypothetical protein	AT1G05205	AT1G05205	1×g-PCB	µ×g-PCB	66.0589	180.508	2.73253	1.45024	0.0378073
266898_at	hypothetical protein	AT2G45990	AT2G45990	1×g-PCB	µ×g-PCB	492.512	1343.96	2.7288	1.44827	0.00267464
263811_at	long chain acyl-CoA synthetase 8	LACS8	AT2G04350	1×g-PCB	µ×g-PCB	459.572	1253.75	2.72807	1.44788	0.00624043
265475_at	NIR1 (NITRITE REDUCTASE 1); ferredoxin-nitrate reductase/ nitrite reductase (NO-forming)	NIR1	AT2G15620	1×g-PCB	µ×g-PCB	1007.68	2748.66	2.72772	1.44769	0.0266175
266293_at	tropinone reductase-like protein	AT2G29360	AT2G29360	1×g-PCB	µ×g-PCB	77.159	210.325	2.72587	1.44672	0.0508058
261412_at	APX1 (ascorbate peroxidase 1); L-ascorbate peroxidase	APX1	AT1G07890	1×g-PCB	µ×g-PCB	5731.56	15616.1	2.72458	1.44604	0.00226744
248629_at	mitochondrial substrate carrier family protein	AT5G48970	AT5G48970	1×g-PCB	µ×g-PCB	399.964	1089.7	2.72451	1.44599	0.0063591
263241_at	ADC1 (ARGININE DECARBOXYLASE 1); arginine decarboxylase	ADC1	AT2G16500	1×g-PCB	µ×g-PCB	849.986	2315.25	2.72386	1.44565	0.00714086
262291_at	calcium-dependent lipid-binding domain-containing protein	AT1G70790	AT1G70790	1×g-PCB	µ×g-PCB	293.68	799.396	2.72199	1.44466	0.0206674
256334_at	putative peptide/nitrate transporter	AT1G72125	AT1G72125	1×g-PCB	µ×g-PCB	40.9067	111.272	2.72014	1.44368	0.00613117
249979_s_at	nucleoside hydrolase 3 /// Inosine-uridine preferring nucleoside hydrolase family protein	AT5G18860 /// AT5G18890	AT5G18860 /// AT5G18890	1×g-PCB	µ×g-PCB	87.3164	237.209	2.71666	1.44183	0.0228822
255243_at	hypothetical protein	AT4G05590	AT4G05590	1×g-PCB	µ×g-PCB	182.029	493.869	2.71314	1.43996	0.00835711
261161_at	leucine-rich repeat transmembrane protein kinase-like protein	AT1G34420	AT1G34420	1×g-PCB	µ×g-PCB	223.661	606.666	2.71244	1.43959	0.0347064
253819_at	concanavalin A-like lectin kinase-like protein	AT4G28350	AT4G28350	1×g-PCB	µ×g-PCB	132.678	359.826	2.71203	1.43937	0.0157912
246989_at	hypothetical protein	AT5G67350	AT5G67350	1×g-PCB	µ×g-PCB	174.434	472.824	2.71062	1.43862	0.00429266
260152_at	IAA6 (INDOLE-3-ACETIC ACID 6); transcription factor	IAA6	AT1G52830	1×g-PCB	µ×g-PCB	107.96	292.374	2.70816	1.43731	0.0465002
248426_at	peptidase family M48 family protein	AT5G51740	AT5G51740	1×g-PCB	µ×g-PCB	254.881	689.824	2.70645	1.4364	0.000606906
247838_at	UBP23 (UBIQUITIN-SPECIFIC PROTEASE 23); ubiquitin thiolesterase/ ubiquitin-specific protease	UBP23	AT5G57990	1×g-PCB	µ×g-PCB	610.382	1650.81	2.70455	1.43539	0.00165254
264936_at	EDA16 (embryo sac development arrest 16); ATP binding / DNA binding / helicase/ nucleic acid binding / protein binding / zinc ion binding	EDA16	AT1G61140	1×g-PCB	µ×g-PCB	844.971	2284.51	2.70366	1.43491	0.00125168
251454_at	RING/U-box superfamily protein	AT3G60080	AT3G60080	1×g-PCB	µ×g-PCB	508.162	1371.47	2.69888	1.43236	0.00269456
258399_at	IAA19 (INDOLE-3-ACETIC ACID INDUCIBLE 19); transcription factor	IAA19	AT3G15540	1×g-PCB	µ×g-PCB	306.502	827.057	2.69837	1.43209	0.0102216
260423_at	ATEXO70D1 (exocyst subunit EXO70 family protein D1); protein binding	ATEXO70D1	AT1G72470	1×g-PCB	µ×g-PCB	83.2442	224.534	2.6973	1.43151	0.0489662
248391_at	TraB family protein	AT5G52030	AT5G52030	1×g-PCB	µ×g-PCB	47.9163	129.199	2.69635	1.43101	0.0276422
264960_at	ATEXT4 (EXTENSIN 4); structural constituent of cell wall	ATEXT4	AT1G76930	1×g-PCB	µ×g-PCB	64.6939	174.416	2.69603	1.43084	0.0229
257185_at	"ATMRP7; ATPase, coupled to transmembrane movement of substances"	ATMRP7	AT3G13100	1×g-PCB	µ×g-PCB	72.0215	193.78	2.69059	1.42792	0.00843133
250252_at	ZIFL1 (ZINC INDUCED FACILITATOR-like 1); tetracycline:hydrogen antiporter	ZIFL1	AT5G13750	1×g-PCB	µ×g-PCB	344.255	926.212	2.69048	1.42786	0.0496736
262340_at	ANAC027 (Arabidopsis NAC domain containing protein 27); transcription factor	ANAC027	AT1G64100 /// AT1G64105	1×g-PCB	µ×g-PCB	278.848	750.11	2.69003	1.42762	0.000547098
251930_at	rhomboid family protein	ATRBL4	AT3G53780	1×g-PCB	µ×g-PCB	509.923	1371.03	2.6887	1.42691	0.000890037
255348_at	hypothetical protein	AT4G03820	AT4G03820	1×g-PCB	µ×g-PCB	86.5714	232.706	2.68803	1.42655	0.00522806
263221_at	MUR4 (MURUS 4); UDP-arabinose 4-epimerase/ catalytic	MUR4	AT1G30620	1×g-PCB	µ×g-PCB	509.115	1368.4	2.68779	1.42642	0.00515223
249932_at	hypothetical protein	AT5G22390	AT5G22390	1×g-PCB	µ×g-PCB	40.967	110.056	2.68645	1.4257	0.0046596
261097_at	putative leucine-rich repeat transmembrane protein kinase	AT1G62950	AT1G62950	1×g-PCB	µ×g-PCB	24.8218	66.6433	2.68487	1.42485	0.0202167
258415_at	MTO3 (METHIONINE OVER-ACCUMULATOR 3); methionine adenosyltransferase	MTO3	AT3G17390	1×g-PCB	µ×g-PCB	5731.73	15383.7	2.68395	1.42436	0.00785589
263261_at	transducin/WD40 repeat-like superfamily protein	AT1G10580	AT1G10580	1×g-PCB	µ×g-PCB	241.742	648.287	2.68173	1.42317	0.0231255
259537_at	PHR1 (PHOTOLYASE 1); DNA photolyase	PHR1	AT1G12370	1×g-PCB	µ×g-PCB	20.4866	54.9182	2.68069	1.4226	0.0502308
265230_s_at	"ATPase, F0 complex, subunit 8 /// orfB"	AT2G07707 /// orfB	AT2G07707 /// ATMG00480	1×g-PCB	µ×g-PCB	425.297	1137.97	2.67572	1.41993	0.0181516
266865_at	FAD3 (FATTY ACID DESATURASE 3); omega-3 fatty acid desaturase	FAD3	AT2G29980	1×g-PCB	µ×g-PCB	969.449	2589.94	2.67156	1.41768	0.0321643
266792_at	SUT2 (SUCROSE TRANSPORTER 2); carbohydrate transmembrane transporter/ sucrose transmembrane transporter/ sucrose:hydrogen symporter/ sugar:hydrogen symporter	SUT2	AT2G02860	1×g-PCB	µ×g-PCB	676.172	1805.84	2.67069	1.41721	0.000418918
258850_at	"CSLD3 (CELLULOSE SYNTHASE-LIKE D3); cellulose synthase/ transferase, transferring glycosyl groups"	CSLD3	AT3G03050	1×g-PCB	µ×g-PCB	1185.02	3163.91	2.66992	1.4168	0.00175005
263877_at	hypothetical protein	AT2G21780	AT2G21780	1×g-PCB	µ×g-PCB	20.3734	54.33	2.66672	1.41506	0.0148699
263467_at	basic helix-loop-helix domain-containing protein	AT2G31730	AT2G31730	1×g-PCB	µ×g-PCB	66.4566	177.058	2.66426	1.41373	0.0347495
252929_at	fructose-bisphosphate aldolase 2	FBA2	AT4G38970	1×g-PCB	µ×g-PCB	1562.45	4157.64	2.66098	1.41196	0.0218005
246582_at	proline-rich family protein	AT1G31750	AT1G31750	1×g-PCB	µ×g-PCB	31.1884	82.9746	2.66043	1.41166	0.0380172
262970_at	protein disulfide-isomerase LQY1	AT1G75690	AT1G75690	1×g-PCB	µ×g-PCB	236.292	628.364	2.65927	1.41103	0.0249156
263222_at	protein kinase family protein	AT1G30640	AT1G30640	1×g-PCB	µ×g-PCB	278.879	741.492	2.65883	1.41079	0.00460064
251503_at	"ATMRP14; ATPase, coupled to transmembrane movement of substances"	ATMRP14	AT3G59140	1×g-PCB	µ×g-PCB	78.9948	210.033	2.65882	1.41079	0.043299
254244_at	cysteine-rich receptor-like protein kinase 15	CRK15	AT4G23230	1×g-PCB	µ×g-PCB	45.9205	122.057	2.65801	1.41035	0.0288006
254082_at	QC (GLUTAMINYL CYCLASE); catalytic/ glutaminyl-peptide cyclotransferase	QC	AT4G25720	1×g-PCB	µ×g-PCB	244.391	649.536	2.65777	1.41022	0.00016513
255378_at	"ATGSL05 (GLUCAN SYNTHASE-LIKE 5); 1,3-beta-glucan synthase/ transferase, transferring glycosyl groups"	ATGSL05	AT4G03550	1×g-PCB	µ×g-PCB	340.629	905.21	2.65747	1.41005	0.000649195
259321_at	"GAUT13 (Galacturonosyltransferase 13); polygalacturonate 4-alpha-galacturonosyltransferase/ transferase, transferring glycosyl groups / transferase, transferring hexosyl groups"	GAUT13	AT3G01040	1×g-PCB	µ×g-PCB	242.478	644.308	2.65718	1.4099	0.00706482
265242_at	hypothetical protein	AT2G07705	AT2G07705	1×g-PCB	µ×g-PCB	75.6467	200.926	2.65611	1.40931	0.0208661
249727_at	unknown protein	MRU1	AT5G35490	1×g-PCB	µ×g-PCB	30.2932	80.4028	2.65415	1.40825	0.032794
249728_at	RabGAP/TBC domain-containing protein	AT5G24390	AT5G24390	1×g-PCB	µ×g-PCB	35.1741	93.2956	2.65239	1.40729	0.0394372
254798_at	oleoyl-acyl carrier protein thioesterase 2	AT4G13050	AT4G13050	1×g-PCB	µ×g-PCB	201.582	533.897	2.64854	1.4052	0.0283534
252866_at	hypothetical protein	AT4G39840	AT4G39840	1×g-PCB	µ×g-PCB	963.496	2550.3	2.64693	1.40432	0.0316633
245724_at	Endosomal targeting BRO1-like domain-containing protein	AT1G73390	AT1G73390	1×g-PCB	µ×g-PCB	324.776	859.569	2.64666	1.40417	0.00300801
259268_at	early nodulin-like protein 16	ENODL16	AT3G01070	1×g-PCB	µ×g-PCB	26.4762	69.9406	2.64164	1.40143	0.0168216
247323_at	dentin sialophosphoprotein-like protein	AT5G64170	AT5G64170	1×g-PCB	µ×g-PCB	870.37	2296.17	2.63815	1.39953	0.00730731
245544_at	glucosyltransferase-related protein	AT4G15270	AT4G15270	1×g-PCB	µ×g-PCB	44.6891	117.865	2.63744	1.39914	0.031692
257252_at	ATGR1 (glutathione-disulfide reductase); FAD binding / NADP or NADPH binding / glutathione-disulfide reductase/ oxidoreductase	ATGR1	AT3G24170	1×g-PCB	µ×g-PCB	1363	3594.53	2.63722	1.39902	0.0281694
245439_at	hypothetical protein	AT4G16670	AT4G16670	1×g-PCB	µ×g-PCB	208.422	549.626	2.63709	1.39895	0.00812088
256250_at	probable sugar phosphate/phosphate translocator	AT3G11320	AT3G11320	1×g-PCB	µ×g-PCB	214.297	565.026	2.63664	1.3987	0.00331232
267604_at	ZFN2 (ZINC FINGER NUCLEASE 2); DNA binding / nuclease/ nucleic acid binding	ZFN2	AT2G32930	1×g-PCB	µ×g-PCB	329.991	869.588	2.63519	1.39791	0.00301199
255672_at	EDA8 (EMBRYO SAC DEVELOPMENT ARREST 8)	EDA8	AT4G00310	1×g-PCB	µ×g-PCB	30.7016	80.8958	2.63491	1.39775	0.0450002
257056_at	"core-2/I-branching beta-1,6-N-acetylglucosaminyltransferase family protein"	AT3G15350	AT3G15350	1×g-PCB	µ×g-PCB	535.393	1410.15	2.63386	1.39718	0.0022042
259885_at	DNA-binding bromodomain-containing protein	AT1G76380	AT1G76380	1×g-PCB	µ×g-PCB	236.552	622.71	2.63244	1.3964	0.00888798
257954_at	UDP-glycosyltransferase HYR1	HYR1	AT3G21760	1×g-PCB	µ×g-PCB	178.561	469.907	2.63164	1.39596	0.0239412
253193_at	SEC7-like guanine nucleotide exchange family protein	AT4G35380	AT4G35380	1×g-PCB	µ×g-PCB	45.5196	119.743	2.63059	1.39539	0.0382952
250901_at	RABC2A (RAB GTPASE HOMOLOG C2A); GTP binding / GTP-dependent protein binding / myosin XI tail binding	RABC2A	AT5G03530	1×g-PCB	µ×g-PCB	69.9554	183.74	2.62652	1.39315	0.0218402
259721_at	phosphatidylinositol-4-phosphate 5-kinase 8	AT1G60890	AT1G60890	1×g-PCB	µ×g-PCB	64.0073	167.871	2.62269	1.39105	0.00245069
248262_at	"putative beta-1,3-galactosyltransferase 11"	AT5G53340	AT5G53340	1×g-PCB	µ×g-PCB	149.987	393.046	2.62054	1.38986	0.00125779
256328_at	"6-phosphogluconate dehydrogenase, decarboxylating 3"	AT3G02360	AT3G02360	1×g-PCB	µ×g-PCB	2652.46	6947.75	2.61936	1.38921	0.0189466
248021_at	chaperonin 60 subunit beta 3	AT5G56500	AT5G56500	1×g-PCB	µ×g-PCB	126.033	329.878	2.61738	1.38812	0.00180604
245599_at	RHF1A (RING-H2 GROUP F1A); protein binding / ubiquitin-protein ligase/ zinc ion binding	RHF1A	AT4G14220	1×g-PCB	µ×g-PCB	286.907	750.301	2.61513	1.38688	0.00231315
251106_at	"thylakoid ADP,ATP carrier protein"	TAAC	AT5G01500	1×g-PCB	µ×g-PCB	122.901	321.129	2.61292	1.38566	0.0170775
256848_at	tetratricopeptide repeat domain-containing protein	AT3G27960	AT3G27960	1×g-PCB	µ×g-PCB	560.573	1464.28	2.61212	1.38522	0.0310143
252652_at	ADT4 (arogenate dehydratase 4); arogenate dehydratase/ prephenate dehydratase	ADT4	AT3G44720	1×g-PCB	µ×g-PCB	1347.46	3519.53	2.61197	1.38514	0.0129056
256829_at	aluminum induced protein with YGL and LRDR motif	AT3G22850	AT3G22850	1×g-PCB	µ×g-PCB	185.079	483.005	2.60973	1.3839	0.00166459
251400_at	phosphoglycerate mutase family protein	AT3G60420	AT3G60420	1×g-PCB	µ×g-PCB	206.275	537.316	2.60485	1.3812	0.0218487
266366_at	proline-rich uncharacterized protein	AT2G41420	AT2G41420	1×g-PCB	µ×g-PCB	2680.96	6980.08	2.60357	1.38049	0.000554988
263929_at	URH1 (URIDINE-RIBOHYDROLASE 1); adenosine nucleosidase/ hydrolase/ inosine nucleosidase/ uridine nucleosidase	URH1	AT2G36310	1×g-PCB	µ×g-PCB	227.516	592.348	2.60354	1.38048	0.00585256
263664_at	AXR3 (AUXIN RESISTANT 3); transcription factor	AXR3	AT1G04250	1×g-PCB	µ×g-PCB	108.302	281.964	2.60349	1.38044	0.0465134
264516_at	Early-responsive to dehydration stress protein ERD4	AT1G10090	AT1G10090	1×g-PCB	µ×g-PCB	314.428	818.27	2.60241	1.37985	0.00365374
266398_at	5'-nucleotidase / magnesium ion binding protein	AT2G38680	AT2G38680	1×g-PCB	µ×g-PCB	38.0088	98.8356	2.60033	1.3787	0.0386055
244951_s_at	cytochrome c biogenesis orf452	ccb452	AT2G07723 /// ATMG00180	1×g-PCB	µ×g-PCB	538.504	1400.04	2.59987	1.37844	0.0236008
259749_at	RSW10 (RADIAL SWELLING 10); ribose-5-phosphate isomerase	RSW10	AT1G71100	1×g-PCB	µ×g-PCB	273.505	710.635	2.59826	1.37754	0.00678353
260007_at	glycine-rich protein	AT1G67870	AT1G67870	1×g-PCB	µ×g-PCB	541.857	1407.1	2.59682	1.37674	0.0472841
263536_at	WRKY60; transcription factor	WRKY60	AT2G25000	1×g-PCB	µ×g-PCB	71.5393	184.913	2.58477	1.37004	0.0195602
249068_at	PDLP1 (PLASMODESMATA-LOCATED PROTEIN 1)	PDLP1	AT5G43980	1×g-PCB	µ×g-PCB	72.7176	187.948	2.58463	1.36996	0.00760833
247440_at	glucosinolate transporter-2	AT5G62680	AT5G62680	1×g-PCB	µ×g-PCB	1848.4	4777.41	2.58462	1.36995	0.00396666
258922_at	40S ribosomal protein S17-3	AT3G10610	AT3G10610	1×g-PCB	µ×g-PCB	371.777	960.775	2.58428	1.36976	0.0280713
246383_at	pentatricopeptide repeat-containing protein	AT1G77360	AT1G77360	1×g-PCB	µ×g-PCB	105.937	273.738	2.58397	1.36959	0.0316765
262881_at	probable folate-biopterin transporter 7	AT1G64890	AT1G64890	1×g-PCB	µ×g-PCB	145.541	375.815	2.58219	1.3686	0.00844058
264814_at	SDG37; zinc ion binding	SDG37	AT2G17900	1×g-PCB	µ×g-PCB	86.6614	223.762	2.58202	1.3685	0.00135786
260738_at	hypothetical protein	AT1G14990	AT1G14990	1×g-PCB	µ×g-PCB	54.209	139.929	2.58129	1.36809	0.0222622
249721_at	LSU4 (RESPONSE TO LOW SULFUR 4)	LSU4	AT5G24655	1×g-PCB	µ×g-PCB	58.7979	151.759	2.58102	1.36794	0.000952663
245641_at	hypothetical protein	AT1G25370	AT1G25370	1×g-PCB	µ×g-PCB	489.281	1262.07	2.57944	1.36706	0.00320046
266137_at	PLAC8 family protein	AT2G45010	AT2G45010	1×g-PCB	µ×g-PCB	359.998	928.184	2.5783	1.36642	0.00388528
267076_at	calmodulin-like protein 10	AT2G41090	AT2G41090	1×g-PCB	µ×g-PCB	2477.98	6386.16	2.57716	1.36578	0.00375849
267550_at	AP4.3A; ATP binding / protein kinase/ protein serine/threonine kinase/ protein tyrosine kinase	AP4.3A	AT2G32800	1×g-PCB	µ×g-PCB	1050.29	2704.79	2.57528	1.36473	0.0105626
258015_at	hypothetical protein	AT3G19340	AT3G19340	1×g-PCB	µ×g-PCB	324.724	835.974	2.57441	1.36424	0.0181597
265583_at	hypothetical protein	AT2G20010	AT2G20010	1×g-PCB	µ×g-PCB	348.704	896.852	2.57196	1.36287	0.0151007
259200_at	protein OCTOPUS	AT3G09070	AT3G09070	1×g-PCB	µ×g-PCB	24.486	62.9316	2.5701	1.36183	0.0265156
253205_at	ATCAP1 (ARABIDOPSIS THALIANA CYCLASE ASSOCIATED PROTEIN 1); actin binding	ATCAP1	AT4G34490	1×g-PCB	µ×g-PCB	504.949	1297.61	2.56979	1.36165	0.0127611
264313_at	"carbonic anhydrase, putative / carbonate dehydratase, putative"	BCA4	AT1G70410	1×g-PCB	µ×g-PCB	2882.18	7401.42	2.56799	1.36064	0.00442871
245746_at	transcription factor bHLH115	bHLH115	AT1G51070	1×g-PCB	µ×g-PCB	170.211	436.577	2.56492	1.35891	0.0138927
258794_at	carboxylate clamp-tetratricopeptide repeat protein	AT3G04710	AT3G04710	1×g-PCB	µ×g-PCB	175.732	450.227	2.56201	1.35728	0.0309136
251475_at	C2 domain and GRAM domain-containing protein	AT3G59660	AT3G59660	1×g-PCB	µ×g-PCB	513.146	1314.42	2.5615	1.35699	0.00183336
260143_at	SUC1 (Sucrose-proton symporter 1); carbohydrate transmembrane transporter/ sucrose:hydrogen symporter/ sugar:hydrogen symporter	SUC1	AT1G71880	1×g-PCB	µ×g-PCB	636.393	1629.85	2.56108	1.35675	0.0037079
261883_at	putative receptor-like protein kinase	AT1G80870	AT1G80870	1×g-PCB	µ×g-PCB	69.9029	178.964	2.56018	1.35624	0.0165305
266615_s_at	CTF2A; monooxygenase/ oxidoreductase	CTF2A	AT2G29720 /// AT2G35660	1×g-PCB	µ×g-PCB	782.688	2002.71	2.55876	1.35544	0.0437897
253598_at	40S ribosomal protein S11-2	AT4G30800	AT4G30800	1×g-PCB	µ×g-PCB	61.6358	157.694	2.55847	1.35528	0.0122221
247222_at	ATGCN5 (A. THALIANA GENERAL CONTROL NON-REPRESSIBLE 5); transporter	ATGCN5	AT5G64840	1×g-PCB	µ×g-PCB	1204.01	3078.07	2.5565	1.35417	0.00401823
258091_at	hypothetical protein	AT3G14560	AT3G14560	1×g-PCB	µ×g-PCB	142.831	365.002	2.55548	1.35359	0.0102244
255622_at	"GT72B1; UDP-glucosyltransferase/ UDP-glycosyltransferase/ transferase, transferring glycosyl groups"	GT72B1	AT4G01070	1×g-PCB	µ×g-PCB	774.566	1977.29	2.55277	1.35207	0.0407764
251112_s_at	PDC3 (pyruvate decarboxylase-3); carboxy-lyase/ catalytic/ magnesium ion binding / pyruvate decarboxylase/ thiamin pyrophosphate binding / transferase	PDC3	AT5G01320 /// AT5G01330	1×g-PCB	µ×g-PCB	77.9426	198.948	2.55249	1.3519	0.0395819
265203_at	Sulfite exporter TauE/SafE family protein	AT2G36630	AT2G36630	1×g-PCB	µ×g-PCB	413.249	1054.27	2.55119	1.35117	0.00349313
258245_at	glycine-rich protein	AT3G29075	AT3G29075	1×g-PCB	µ×g-PCB	1020.71	2603.33	2.55051	1.35079	0.00120834
249835_s_at	hypothetical protein /// hypothetical protein	AT5G23490 /// AT5G23510	AT5G23490 /// AT5G23510	1×g-PCB	µ×g-PCB	832.77	2122.46	2.54868	1.34975	0.0107249
251305_at	"peptidyl-prolyl cis-trans isomerase, chloroplast / cyclophilin / rotamase / cyclosporin A-binding protein (ROC4)"	ROC4	AT3G62030	1×g-PCB	µ×g-PCB	454.91	1159.33	2.54848	1.34964	0.0355493
257583_at	PMI2 (plastid movement impaired 2)	PMI2	AT1G66480	1×g-PCB	µ×g-PCB	241.827	615.878	2.54677	1.34867	0.0182776
249214_at	glycosyl hydrolase family 17 protein	AT5G42720	AT5G42720	1×g-PCB	µ×g-PCB	71.2773	181.479	2.54609	1.34829	0.0331983
258117_at	SART-1 family protein	AT3G14700	AT3G14700	1×g-PCB	µ×g-PCB	19.4662	49.5365	2.54474	1.34752	0.0443346
261751_at	CDSP32 (CHLOROPLASTIC DROUGHT-INDUCED STRESS PROTEIN OF 32 KD)	CDSP32	AT1G76080	1×g-PCB	µ×g-PCB	954.826	2426.7	2.54151	1.34568	0.00980588
247111_at	hypothetical protein	AT5G65880	AT5G65880	1×g-PCB	µ×g-PCB	110.076	279.412	2.53836	1.3439	3.58602e-05
251457_s_at	"ATMRP9; ATPase, coupled to transmembrane movement of substances"	ATMRP9	AT3G60160 /// AT3G60970	1×g-PCB	µ×g-PCB	54.6371	138.548	2.5358	1.34244	0.0116769
263010_at	alpha/beta-Hydrolases superfamily protein	AT1G23330	AT1G23330	1×g-PCB	µ×g-PCB	140.755	356.896	2.53558	1.34231	0.000824159
257490_x_at	ETC1 (ENHANCER OF TRY AND CPC 1); DNA binding / transcription factor	ETC1	AT1G01380	1×g-PCB	µ×g-PCB	13.5868	34.4493	2.53549	1.34227	0.00677977
261833_at	ACLA-1; ATP citrate synthase	ACLA-1	AT1G10670	1×g-PCB	µ×g-PCB	1041.75	2639.89	2.53409	1.34147	0.0284029
253425_at	myosin heavy chain-related protein	AT4G32190	AT4G32190	1×g-PCB	µ×g-PCB	407.762	1032.43	2.53195	1.34025	0.00253106
264570_at	NAD(P)-binding Rossmann-fold superfamily protein	AT1G05350	AT1G05350	1×g-PCB	µ×g-PCB	196.174	496.696	2.53192	1.34023	0.00153909
257593_at	Sec14p-like phosphatidylinositol transfer family protein	AT3G24840	AT3G24840	1×g-PCB	µ×g-PCB	79.8886	202.023	2.52881	1.33846	0.00859813
261033_at	JAZ5 (JASMONATE-ZIM-DOMAIN PROTEIN 5)	JAZ5	AT1G17380	1×g-PCB	µ×g-PCB	4514.86	11412.3	2.52771	1.33783	0.00570743
263274_at	CRCK3; ATP binding / kinase/ protein kinase/ protein serine/threonine kinase	CRCK3	AT2G11520	1×g-PCB	µ×g-PCB	711.844	1799.25	2.52759	1.33776	0.00139664
253705_at	HXK1 (HEXOKINASE 1); ATP binding / fructokinase/ glucokinase/ hexokinase	HXK1	AT4G29130	1×g-PCB	µ×g-PCB	357.351	903.04	2.52704	1.33745	0.00240363
261336_at	ChaC-like family protein	AT1G44790	AT1G44790	1×g-PCB	µ×g-PCB	194.901	492.447	2.52666	1.33723	0.00139661
257522_at	yippee family putative zinc-binding protein	AT3G08990	AT3G08990	1×g-PCB	µ×g-PCB	139.927	353.499	2.52631	1.33703	0.0140238
261362_s_at	60S ribosomal protein L35a-2 /// 60S ribosomal protein L35a-4	AT1G41880 /// AT3G55750	AT1G41880 /// AT3G55750	1×g-PCB	µ×g-PCB	1626.51	4106.17	2.52453	1.33601	0.00633807
249790_at	membrane protein of ER body 2	AT5G24290	AT5G24290	1×g-PCB	µ×g-PCB	242.508	611.847	2.523	1.33514	0.0337766
264953_at	ADH1 (ALCOHOL DEHYDROGENASE 1); alcohol dehydrogenase	ADH1	AT1G77120	1×g-PCB	µ×g-PCB	96.9531	244.423	2.52104	1.33402	0.0181422
247563_at	PDCB1 (PLASMODESMATA CALLOSE-BINDING PROTEIN 1); callose binding / polysaccharide binding	PDCB1	AT5G61130	1×g-PCB	µ×g-PCB	73.7588	185.89	2.52025	1.33357	0.0206864
258679_at	"phosphoglycerate mutase, 2,3-bisphosphoglycerate-independent"	AT3G08590	AT3G08590	1×g-PCB	µ×g-PCB	890.947	2242.19	2.51664	1.3315	0.00581073
252648_at	TIR-NBS-LRR class disease resistance protein	AT3G44630	AT3G44630	1×g-PCB	µ×g-PCB	1045.31	2629.83	2.51584	1.33104	0.000979735
264123_at	calcium-binding endonuclease/exonuclease/phosphatase family protein	AT1G02270	AT1G02270	1×g-PCB	µ×g-PCB	935.634	2350.55	2.51226	1.32898	0.00565826
258998_at	P-loop containing nucleoside triphosphate hydrolases superfamily protein	AT3G01820	AT3G01820	1×g-PCB	µ×g-PCB	946.891	2378.05	2.51143	1.32851	0.00197792
260984_at	hydroxyproline-rich glycoprotein family protein	AT1G53645	AT1G53645	1×g-PCB	µ×g-PCB	179.431	450.56	2.51105	1.32829	0.00131211
261455_at	nucleotide-sugar transporter-like protein	AT1G21070	AT1G21070	1×g-PCB	µ×g-PCB	101.557	254.808	2.50902	1.32712	0.0146926
247922_at	Galactosyltransferase family protein	AT5G57500	AT5G57500	1×g-PCB	µ×g-PCB	150.62	377.871	2.50878	1.32698	0.00759265
247657_at	gibberellin-regulated protein	AT5G59845	AT5G59845	1×g-PCB	µ×g-PCB	24.6629	61.8335	2.50715	1.32605	0.0208695
247243_at	nodulin MtN21 /EamA-like transporter family protein	AT5G64700	AT5G64700	1×g-PCB	µ×g-PCB	73.8774	185.163	2.50635	1.32559	0.0259209
254738_at	RNA recognition motif-containing protein	AT4G13860	---	1×g-PCB	µ×g-PCB	20.9712	52.5202	2.5044	1.32447	0.00768139
254701_at	putative methyltransferase PMT14	AT4G18030	AT4G18030	1×g-PCB	µ×g-PCB	894.816	2240.05	2.50337	1.32387	0.0448611
257628_at	CYP71B26; electron carrier/ heme binding / iron ion binding / monooxygenase/ oxygen binding	CYP71B26	AT3G26290	1×g-PCB	µ×g-PCB	285.465	714.606	2.50331	1.32384	0.036819
265034_at	transcription factor bHLH112	AT1G61660	AT1G61660	1×g-PCB	µ×g-PCB	764.217	1911.9	2.50177	1.32295	0.0125796
254077_at	detoxifying efflux carrier 35	DTX35	AT4G25640	1×g-PCB	µ×g-PCB	1562.68	3909.23	2.50162	1.32286	0.00302202
263426_at	ATGPX2 (GLUTATHIONE PEROXIDASE 2); glutathione peroxidase	ATGPX2	AT2G31570	1×g-PCB	µ×g-PCB	2865.34	7167.93	2.5016	1.32285	0.00687599
250201_at	hypothetical protein	AT5G14230	AT5G14230	1×g-PCB	µ×g-PCB	37.3512	93.3711	2.49982	1.32182	0.00294341
257249_at	"Beta-glucosidase, GBA2 type family protein"	AT3G24180	AT3G24180	1×g-PCB	µ×g-PCB	379.025	947.44	2.49968	1.32174	0.00193593
260667_at	"KCS4 (3-KETOACYL-COA SYNTHASE 4); acyltransferase/ catalytic/ transferase, transferring acyl groups other than amino-acyl groups"	KCS4	AT1G19440	1×g-PCB	µ×g-PCB	206.864	516.936	2.49892	1.3213	0.00478503
248819_at	S-ribonuclease binding protein	AT5G47050	AT5G47050	1×g-PCB	µ×g-PCB	271.126	677.454	2.49867	1.32116	0.023543
258024_at	zinc finger CCCH domain-containing protein 39	AT3G19360	AT3G19360	1×g-PCB	µ×g-PCB	68.4233	170.758	2.49561	1.3194	0.0036833
250493_at	ARM repeat superfamily protein	AT5G09800	AT5G09800	1×g-PCB	µ×g-PCB	108.775	270.935	2.49078	1.3166	0.0222266
260468_at	"SNF2 , helicase and zinc-finger domain-containing protein"	AT1G11100	AT1G11100	1×g-PCB	µ×g-PCB	56.9353	141.737	2.48944	1.31582	0.046764
248138_at	PDC2 (pyruvate decarboxylase-2); carboxy-lyase/ catalytic/ magnesium ion binding / pyruvate decarboxylase/ thiamin pyrophosphate binding	PDC2	AT5G54960	1×g-PCB	µ×g-PCB	750.468	1867.74	2.48876	1.31543	0.0102157
250316_at	ATCYS1 (A. thaliana cystatin-1); cysteine-type endopeptidase inhibitor	ATCYS1	AT5G12140	1×g-PCB	µ×g-PCB	1793.81	4463.28	2.48815	1.31507	0.00306838
255900_at	hypothetical protein	AT1G17830	AT1G17830	1×g-PCB	µ×g-PCB	288.942	718.732	2.48746	1.31468	0.0172065
267536_at	PLDBETA1 (PHOSPHOLIPASE D BETA 1); phospholipase D	PLDBETA1	AT2G42010	1×g-PCB	µ×g-PCB	336.759	836.727	2.48464	1.31304	0.00598051
253949_at	AR192; adenyl-nucleotide exchange factor/ chaperone binding / protein binding / protein homodimerization	AR192	AT4G26780	1×g-PCB	µ×g-PCB	69.197	171.929	2.48464	1.31303	0.0197425
263788_at	putative sarcosine oxidase	AT2G24580	AT2G24580	1×g-PCB	µ×g-PCB	45.5715	113.22	2.48446	1.31293	0.0451361
251762_at	SBPASE (sedoheptulose-bisphosphatase); phosphoric ester hydrolase/ sedoheptulose-bisphosphatase	SBPASE	AT3G55800	1×g-PCB	µ×g-PCB	435.254	1079.34	2.4798	1.31022	0.0509212
260107_at	pfkB-like carbohydrate kinase family protein	AT1G66430	AT1G66430	1×g-PCB	µ×g-PCB	149.104	369.405	2.47751	1.30889	0.0274458
257666_at	putative BPI/LBP family protein	AT3G20270	AT3G20270	1×g-PCB	µ×g-PCB	59.324	146.882	2.47593	1.30797	0.0071423
265955_at	"PDR5 (PLEIOTROPIC DRUG RESISTANCE 5); ATPase, coupled to transmembrane movement of substances"	PDR5	AT2G37280	1×g-PCB	µ×g-PCB	40.0433	98.9257	2.47047	1.30479	0.0254421
266352_at	invertase/pectin methylesterase inhibitor-like protein	AT2G01610	AT2G01610	1×g-PCB	µ×g-PCB	51.4094	126.984	2.47006	1.30454	0.00405773
245329_at	putative E3 ubiquitin-protein ligase XBAT34	XBAT34	AT4G14365	1×g-PCB	µ×g-PCB	6452.97	15935.2	2.46944	1.30419	0.0248994
264645_at	phosphoglycerate mutase-like protein	AT1G08940	AT1G08940	1×g-PCB	µ×g-PCB	1126.11	2780.35	2.46899	1.30392	0.0113604
261398_at	"sodium proton exchanger, putative (NHX6)"	NHX6	AT1G79610	1×g-PCB	µ×g-PCB	202.142	499.019	2.46866	1.30373	0.00872459
257150_at	S-adenosyl-L-methionine-dependent methyltransferase-like protein	AT3G27230	AT3G27230	1×g-PCB	µ×g-PCB	214.177	528.517	2.46767	1.30315	0.0341804
266687_at	PRMT1A (PROTEIN ARGININE METHYLTRANSFERASE 1A); protein-arginine N-methyltransferase	PRMT1A	AT2G19670	1×g-PCB	µ×g-PCB	25.6207	63.2082	2.46708	1.3028	0.023345
260455_at	hypothetical protein	AT1G72500	AT1G72500	1×g-PCB	µ×g-PCB	345.056	851.142	2.46668	1.30257	0.00259331
248686_at	receptor-like protein kinase-related family protein	AT5G48540	AT5G48540	1×g-PCB	µ×g-PCB	1266.48	3122.62	2.46558	1.30193	0.0152944
245793_at	NAD(P)-binding Rossmann-fold-containing protein	AT1G32220	AT1G32220	1×g-PCB	µ×g-PCB	80.2989	197.935	2.46497	1.30157	0.0312829
258566_at	GLR1.1 (GLUTAMATE RECEPTOR 1.1); cation channel/ intracellular ligand-gated ion channel	GLR1.1	AT3G04110	1×g-PCB	µ×g-PCB	420.812	1036.8	2.46382	1.3009	0.00221073
257058_at	ATCOX17; copper chaperone	COX17	AT3G15352	1×g-PCB	µ×g-PCB	121.866	300.15	2.46295	1.30039	0.00585148
255046_at	"ATPD (ATP SYNTHASE DELTA-SUBUNIT GENE); hydrogen ion transporting ATP synthase, rotational mechanism / proton-transporting ATPase, rotational mechanism"	ATPD	AT4G09650	1×g-PCB	µ×g-PCB	390.087	960.513	2.4623	1.30001	0.0400902
255501_at	U3 ribonucleoprotein family protein	AT4G02400	AT4G02400	1×g-PCB	µ×g-PCB	126.666	311.754	2.46123	1.29938	0.000890509
257697_at	aspartyl protease family protein	AT3G12700	AT3G12700	1×g-PCB	µ×g-PCB	116.121	285.791	2.46115	1.29933	0.00486736
264897_at	dynein light chain type 1-like protein	AT1G23220	AT1G23220	1×g-PCB	µ×g-PCB	330.269	812.411	2.45984	1.29857	0.00290443
247533_at	protein kinase-like protein	AT5G61570	AT5G61570	1×g-PCB	µ×g-PCB	44.9217	110.498	2.45979	1.29854	0.0214313
246744_at	hypoxia-responsive family protein	AT5G27760	AT5G27760	1×g-PCB	µ×g-PCB	2640.41	6488.04	2.45721	1.29702	0.00815601
247118_at	ACR1 (ACT Domain Repeat 1); amino acid binding	ACR1	AT5G65890	1×g-PCB	µ×g-PCB	137.3	337.096	2.45518	1.29583	0.0111567
247775_at	phosphoinositide-specific phospholipase C family protein	PLC5	AT5G58690	1×g-PCB	µ×g-PCB	66.9504	164.003	2.44962	1.29256	0.0119217
256722_at	ATP11 molecular chaperone domain-containing protein	AT2G34050	AT2G34050	1×g-PCB	µ×g-PCB	81.991	200.831	2.44943	1.29245	0.017619
267179_at	AGD7; ARF GTPase activator/ DNA binding / zinc ion binding	AGD7	AT2G37550	1×g-PCB	µ×g-PCB	375.764	920.084	2.44857	1.29194	0.00426422
245951_at	ASP2 (ASPARTATE AMINOTRANSFERASE 2); L-aspartate:2-oxoglutarate aminotransferase	ASP2	AT5G19550	1×g-PCB	µ×g-PCB	784.736	1921.26	2.44829	1.29177	0.00557333
261109_at	CKX5 (CYTOKININ OXIDASE 5); cytokinin dehydrogenase	CKX5	AT1G75450	1×g-PCB	µ×g-PCB	465.337	1139.05	2.4478	1.29149	0.00213163
260686_at	late embryogenesis abundant hydroxyproline-rich glycoprotein	AT1G17620	AT1G17620	1×g-PCB	µ×g-PCB	1173.14	2870.54	2.44689	1.29095	0.018105
255764_at	HCF173 (high chlorophyll fluorescence phenotype 173); binding / catalytic/ transcription repressor	HCF173	AT1G16720	1×g-PCB	µ×g-PCB	250.263	612.177	2.44614	1.29051	0.0499302
253891_at	major facilitator protein	AT4G27720	AT4G27720	1×g-PCB	µ×g-PCB	969.728	2370.48	2.44448	1.28953	0.0309385
244953_s_at	NADH dehydrogenase subunit 6	nad6	AT2G07731 /// ATMG00270	1×g-PCB	µ×g-PCB	171.504	417.413	2.43385	1.28324	0.0253257
266882_at	hypothetical protein	AT2G44670	AT2G44670	1×g-PCB	µ×g-PCB	1075.14	2616.27	2.43342	1.28298	0.0357025
261776_at	SAUR-like auxin-responsive protein	AT1G76190	AT1G76190	1×g-PCB	µ×g-PCB	19.4785	47.3984	2.43337	1.28296	0.0295336
254847_at	PLDGAMMA1; phospholipase D	PLDGAMMA1	AT4G11850	1×g-PCB	µ×g-PCB	128.526	312.677	2.4328	1.28262	0.00292259
246549_at	"core-2/I-branching beta-1,6-N-acetylglucosaminyltransferase family protein"	AT5G15050	AT5G15050	1×g-PCB	µ×g-PCB	70.5058	171.424	2.43135	1.28176	0.0137362
248036_at	"nucleolar protein, putative"	OLI2	AT5G55920	1×g-PCB	µ×g-PCB	328.478	798.529	2.431	1.28155	0.000567404
249526_at	proline-rich receptor-like protein kinase PERK8	AT5G38560	AT5G38560	1×g-PCB	µ×g-PCB	286.796	697.108	2.43068	1.28136	0.00059207
258609_at	AIG2-like (avirulence induced gene) family protein	AT3G02910	AT3G02910	1×g-PCB	µ×g-PCB	1545.65	3756.64	2.43047	1.28124	0.00886959
254835_s_at	CYP706A5; electron carrier/ heme binding / iron ion binding / monooxygenase/ oxygen binding	CYP706A5	AT4G12310 /// AT4G12320	1×g-PCB	µ×g-PCB	92.0758	223.688	2.42939	1.2806	0.0194311
248243_at	CPuORF50 (Conserved peptide upstream open reading frame 50)	CPuORF50	AT5G53588 /// AT5G53590	1×g-PCB	µ×g-PCB	1199.1	2912.33	2.42877	1.28022	0.0305531
245427_at	glycerol-3-phosphate permease 4	AT4G17550	AT4G17550	1×g-PCB	µ×g-PCB	528.147	1282.39	2.4281	1.27983	0.0124248
265649_at	"ATFD3 (ferredoxin 3); 2 iron, 2 sulfur cluster binding / electron carrier/ iron-sulfur cluster binding"	ATFD3	AT2G27510	1×g-PCB	µ×g-PCB	1928.3	4680.61	2.42732	1.27937	0.00110698
253600_at	scpl29 (serine carboxypeptidase-like 29); serine-type carboxypeptidase	scpl29	AT4G30810	1×g-PCB	µ×g-PCB	177.829	431.635	2.42725	1.27932	0.0217988
253490_at	Probable diphthine synthase	AT4G31790	AT4G31790	1×g-PCB	µ×g-PCB	349.474	848.183	2.42703	1.27919	0.000234661
248381_at	pfkB-like carbohydrate kinase family protein	AT5G51830	AT5G51830	1×g-PCB	µ×g-PCB	214.175	519.765	2.42683	1.27907	0.0178118
261064_at	ftsh10 (FtsH protease 10); ATP binding / ATPase/ metalloendopeptidase/ nucleoside-triphosphatase/ nucleotide binding / zinc ion binding	ftsh10	AT1G07510	1×g-PCB	µ×g-PCB	412.662	1001.39	2.42665	1.27897	0.0058001
264998_at	hypothetical protein	AT1G67330	AT1G67330	1×g-PCB	µ×g-PCB	97.6104	236.53	2.4232	1.27691	0.0480414
246073_at	ribosomal protein L36	AT5G20180	AT5G20180	1×g-PCB	µ×g-PCB	850.804	2061.09	2.42252	1.27651	0.00150034
266883_at	DAD1 (DEFECTIVE ANTHER DEHISCENCE 1); phospholipase A1/ triacylglycerol lipase	DAD1	AT2G44810	1×g-PCB	µ×g-PCB	58.8136	142.406	2.42132	1.27579	0.0323227
249032_at	Toll-Interleukin-Resistance domain-containing protein	AT5G44910	AT5G44910	1×g-PCB	µ×g-PCB	62.2592	150.465	2.41674	1.27306	0.0285936
259309_at	protein kinase superfamily protein	AT3G05050	AT3G05050	1×g-PCB	µ×g-PCB	166.807	402.984	2.41587	1.27254	0.000230268
252359_at	zinc finger CCCH domain-containing protein 43	AT3G48440	AT3G48440	1×g-PCB	µ×g-PCB	103.897	250.819	2.41412	1.2715	0.00787758
264351_at	C2 calcium/lipid-binding and GRAM domain containing protein	AT1G03370	AT1G03370	1×g-PCB	µ×g-PCB	1056.85	2550.79	2.41358	1.27118	0.00680767
264044_at	PFK5 (PHOSPHOFRUCTOKINASE 5); 6-phosphofructokinase	PFK5	AT2G22480	1×g-PCB	µ×g-PCB	243.589	587.71	2.41271	1.27065	0.00558495
246042_at	alcohol dehydrogenase-like protein	AT5G19440	AT5G19440	1×g-PCB	µ×g-PCB	1332.83	3214.57	2.41184	1.27013	0.00274265
252373_at	EDS1 (enhanced disease susceptibility 1); lipase/ signal transducer/ triacylglycerol lipase	EDS1	AT3G48090	1×g-PCB	µ×g-PCB	732.38	1765.63	2.41081	1.26952	0.0128156
250110_at	early nodulin-like protein 17	ENODL17	AT5G15350	1×g-PCB	µ×g-PCB	1686.26	4063.72	2.4099	1.26898	0.0159894
247851_at	TIL (TEMPERATURE-INDUCED LIPOCALIN); binding / transporter	TIL	AT5G58070	1×g-PCB	µ×g-PCB	3903.21	9404.41	2.4094	1.26868	0.0103128
255230_at	ATRFNR1 (ROOT FNR 1); FAD binding / NADP or NADPH binding / electron carrier/ ferredoxin-NADP+ reductase/ oxidoreductase	ATRFNR1	AT4G05390	1×g-PCB	µ×g-PCB	328.876	792.391	2.40939	1.26867	0.0321575
264593_at	ARAC1; GTP binding	ARAC1	AT2G17800	1×g-PCB	µ×g-PCB	155.926	375.682	2.40936	1.26865	0.0232517
258460_at	ECT6 (evolutionarily conserved C-terminal region 6)	ECT6	AT3G17330	1×g-PCB	µ×g-PCB	110.651	266.552	2.40894	1.2684	0.00847509
250422_at	endomembrane family protein 70	AT5G10840	AT5G10840	1×g-PCB	µ×g-PCB	581.02	1398.27	2.40659	1.26699	0.00818577
251482_s_at	concanavalin A-like lectin kinase-like protein /// concanavalin A-like lectin kinase-like protein	AT3G59740 /// AT3G59750	AT3G59740 /// AT3G59750	1×g-PCB	µ×g-PCB	24.1108	58.0161	2.40622	1.26677	0.0445774
260418_s_at	cox19 family protein	COX19-1	AT1G66590 /// AT1G69750	1×g-PCB	µ×g-PCB	377.574	907.637	2.40387	1.26536	0.00660216
251505_at	CPuORF18 (Conserved peptide upstream open reading frame 18)	CPuORF18	AT3G59050 /// AT3G59052	1×g-PCB	µ×g-PCB	457.963	1100.61	2.40327	1.265	0.0299859
265012_at	short-chain dehydrogenase/reductase (SDR) family protein	KCR2	AT1G24470	1×g-PCB	µ×g-PCB	25.964	62.398	2.40326	1.26499	0.00353991
266017_at	hypothetical protein	AT2G18690	AT2G18690	1×g-PCB	µ×g-PCB	4098.3	9845.23	2.40227	1.2644	0.0312138
258298_at	putative methyltransferase PMT1	AT3G23300	AT3G23300	1×g-PCB	µ×g-PCB	448.768	1077.25	2.40047	1.26332	0.00714302
257816_at	"QUA1 (QUASIMODO 1); polygalacturonate 4-alpha-galacturonosyltransferase/ transferase, transferring glycosyl groups / transferase, transferring hexosyl groups"	QUA1	AT3G25140	1×g-PCB	µ×g-PCB	1654.1	3965.75	2.39753	1.26155	0.000912417
258295_at	FIBRILLIN 4	FIB4	AT3G23400	1×g-PCB	µ×g-PCB	1358.4	3254.4	2.39576	1.26048	0.0160103
256443_at	adenine/guanine permease AZG1	AZG1	AT3G10960	1×g-PCB	µ×g-PCB	129.688	310.238	2.39218	1.25833	0.00574316
246309_at	ATG1 (ARABIDOPSIS TRANSMEMBRANE PROTEIN G1P-RELATED 1)	ATG1	AT3G51790	1×g-PCB	µ×g-PCB	252.18	602.498	2.38915	1.2565	0.00107026
257766_at	IAA2 (INDOLE-3-ACETIC ACID INDUCIBLE 2); transcription factor	IAA2	AT3G23030	1×g-PCB	µ×g-PCB	2105.67	5026.23	2.387	1.2552	0.0104544
257332_at	hypothetical protein	ArthMp108	ATMG01350	1×g-PCB	µ×g-PCB	51.5297	122.99	2.38678	1.25507	0.00993755
247427_at	hypothetical protein	AT5G62580	AT5G62580	1×g-PCB	µ×g-PCB	141.38	337.316	2.38588	1.25452	0.023629
253818_at	hypothetical protein	AT4G28330	AT4G28330	1×g-PCB	µ×g-PCB	101.296	241.679	2.38588	1.25452	0.00306376
264213_at	ATPP2-A5 (ARABIDOPSIS THALIANA PHLOEM PROTEIN 2 A5); carbohydrate binding	ATPP2-A5	AT1G65390	1×g-PCB	µ×g-PCB	647.622	1544.64	2.38509	1.25404	0.0245349
257463_at	Sec14p-like phosphatidylinositol transfer family protein	AT1G14820	AT1G14820	1×g-PCB	µ×g-PCB	86.8499	207.138	2.38501	1.25399	0.0494283
249380_at	glutaredoxin-C2	AT5G40370	AT5G40370	1×g-PCB	µ×g-PCB	2378.48	5672.58	2.38496	1.25396	0.00176731
245270_at	TUA6; structural constituent of cytoskeleton	TUA6	AT4G14960	1×g-PCB	µ×g-PCB	2451.06	5840.04	2.38266	1.25257	0.0249112
255300_at	CLS (CARDIOLIPIN SYNTHASE); cardiolipin synthase/ phosphatidyltransferase	CLS	AT4G04870	1×g-PCB	µ×g-PCB	96.6112	230.111	2.38183	1.25207	0.0191551
253866_at	"core-2/I-branching beta-1,6-N-acetylglucosaminyltransferase family protein"	AT4G27480	AT4G27480	1×g-PCB	µ×g-PCB	184.482	439.391	2.38175	1.25202	0.0432684
264153_at	ATPP2-A5 (ARABIDOPSIS THALIANA PHLOEM PROTEIN 2 A5); carbohydrate binding	ATPP2-A5	AT1G65390	1×g-PCB	µ×g-PCB	347.631	827.472	2.38032	1.25115	0.0152149
247788_at	pfkB-like carbohydrate kinase family protein	AT5G58730	AT5G58730	1×g-PCB	µ×g-PCB	353.398	840.87	2.37939	1.25059	0.0252364
252205_at	hypothetical protein	AT3G50350	AT3G50350	1×g-PCB	µ×g-PCB	91.3506	217.284	2.37857	1.25009	0.0148283
253630_at	AFG1-like ATPase family protein	AT4G30490	AT4G30490	1×g-PCB	µ×g-PCB	797.567	1896.26	2.37756	1.24948	0.00232832
251063_at	protein kinase family protein	AT5G01850	AT5G01850	1×g-PCB	µ×g-PCB	327.426	778.474	2.37756	1.24948	0.0099668
263782_at	hypothetical protein	AT2G46380	AT2G46380	1×g-PCB	µ×g-PCB	69.0789	164.166	2.3765	1.24884	0.0343684
257519_at	RNA recognition motif-containing protein	AT3G01210	AT3G01210	1×g-PCB	µ×g-PCB	396.939	943.097	2.37593	1.24849	0.00939115
267627_at	U5 small nuclear ribonucleoprotein helicase	AT2G42270	AT2G42270	1×g-PCB	µ×g-PCB	247.87	588.9	2.37584	1.24844	0.00390925
261618_at	MATE efflux family protein	AT1G33110	AT1G33110	1×g-PCB	µ×g-PCB	413.529	981.126	2.37257	1.24645	0.00431362
260645_at	TTL1 (TETRATRICOPETIDE-REPEAT THIOREDOXIN-LIKE 1); binding	TTL1	AT1G53300	1×g-PCB	µ×g-PCB	121.22	287.493	2.37167	1.2459	0.00811303
259096_at	40S ribosomal protein S3a-1	AT3G04840	AT3G04840	1×g-PCB	µ×g-PCB	1334.42	3160.46	2.36842	1.24392	0.00198244
261421_at	IQD30; calmodulin binding	IQD30	AT1G18840	1×g-PCB	µ×g-PCB	101.579	240.421	2.36685	1.24297	0.0477009
246429_at	heavy metal transport/detoxification domain-containing protein	AT5G17450	AT5G17450	1×g-PCB	µ×g-PCB	50.1774	118.724	2.36609	1.2425	0.0268653
246029_at	leucine-rich repeat-containing protein	AT5G21090	AT5G21090	1×g-PCB	µ×g-PCB	4552.61	10759.6	2.36339	1.24086	0.000676181
253274_at	EDA9 (embryo sac development arrest 9); ATP binding	EDA9	AT4G34200	1×g-PCB	µ×g-PCB	557.698	1317.42	2.36224	1.24016	0.0138817
252034_at	hypothetical protein	AT3G52040	AT3G52040	1×g-PCB	µ×g-PCB	342.231	807.987	2.36094	1.23936	0.00446009
250413_at	APT5 (Adenine phosphoribosyltransferase 5); adenine phosphoribosyltransferase	APT5	AT5G11160	1×g-PCB	µ×g-PCB	81.8886	192.914	2.35581	1.23622	0.0125912
258587_at	hypothetical protein	AT3G04310	AT3G04310	1×g-PCB	µ×g-PCB	72.6015	171.006	2.3554	1.23597	0.000759679
267170_at	"core-2/I-branching beta-1,6-N-acetylglucosaminyltransferase family protein"	AT2G37585	AT2G37585	1×g-PCB	µ×g-PCB	72.4965	170.757	2.35539	1.23596	0.0381187
263922_s_at	Pyruvate kinase family protein /// pyruvate kinase	AT2G36580 /// AT3G52990	AT2G36580 /// AT3G52990	1×g-PCB	µ×g-PCB	734.981	1731.08	2.35527	1.23589	0.00085138
258887_at	PLDP2; phospholipase D	PLDP2	AT3G05630	1×g-PCB	µ×g-PCB	45.8693	108.014	2.35481	1.23561	0.0073197
267382_at	bifunctional inhibitor/lipid-transfer protein/seed storage 2S albumin superfamily protein	AT2G44300	AT2G44300	1×g-PCB	µ×g-PCB	92.6097	218.046	2.35446	1.2354	0.0415776
261506_at	ATCK1 (CHOLINE KINASE 1); choline kinase	ATCK1	AT1G71697	1×g-PCB	µ×g-PCB	2280.95	5369.62	2.35411	1.23518	0.00375671
253950_at	Dihydrolipoamide succinyltransferase	AT4G26910	AT4G26910	1×g-PCB	µ×g-PCB	1124.49	2645.96	2.35303	1.23452	0.0032022
259771_at	putative methyltransferase PMT24	AT1G29470	AT1G29470	1×g-PCB	µ×g-PCB	1335.96	3142.74	2.35241	1.23414	0.0236577
259443_at	putative chitinase	AT1G02360	AT1G02360	1×g-PCB	µ×g-PCB	294.304	691.981	2.35125	1.23343	0.0489143
256453_at	DHAR2 (DEHYDROASCORBATE REDUCTASE 2); glutathione binding / glutathione dehydrogenase (ascorbate)	DHAR2	AT1G75270	1×g-PCB	µ×g-PCB	448.478	1052.8	2.34751	1.23113	0.0219444
247554_at	ATEXO70E2 (EXOCYST SUBUNIT EXO70 FAMILY PROTEIN E2); protein binding	ATEXO70E2	AT5G61010	1×g-PCB	µ×g-PCB	762.484	1789.83	2.34737	1.23105	0.0010779
248195_at	ATMAMI (ARABIDOPSIS THALIANA MEMBRANE-ASSOCIATED MANNITOL-INDUCED); structural molecule	ATMAMI	AT5G54110	1×g-PCB	µ×g-PCB	866.766	2034.54	2.34727	1.23098	0.0192789
265006_at	TIM13 (TRANSLOCASE OF THE INNER MITOCHONDRIAL MEMBRANE 13); P-P-bond-hydrolysis-driven protein transmembrane transporter	TIM13	AT1G61570	1×g-PCB	µ×g-PCB	641.832	1506.33	2.34692	1.23077	0.00186541
260597_at	zinc ion binding protein	AT1G55915	AT1G55915	1×g-PCB	µ×g-PCB	57.4317	134.747	2.34621	1.23033	0.0164915
265444_s_at	RD28 (RESPONSIVE TO DESICCATION 28); water channel	RD28	AT2G37170 /// AT2G37180	1×g-PCB	µ×g-PCB	4228.17	9915.49	2.3451	1.22965	0.00469293
253052_at	CYP81H1; electron carrier/ heme binding / iron ion binding / monooxygenase/ oxygen binding	CYP81H1	AT4G37310	1×g-PCB	µ×g-PCB	127.674	299.351	2.34465	1.22937	0.00341497
264873_at	"UGT74B1 (UDP-glucosyl transferase 74B1); UDP-glycosyltransferase/ thiohydroximate beta-D-glucosyltransferase/ transferase, transferring glycosyl groups"	UGT74B1	AT1G24100	1×g-PCB	µ×g-PCB	897.183	2103.26	2.34429	1.22915	0.0160513
262540_at	putative 1-phosphatidylinositol-3-phosphate 5-kinase	FAB1D	AT1G34260	1×g-PCB	µ×g-PCB	365.352	856.446	2.34416	1.22907	0.00118112
265238_s_at	ribosomal protein S7 /// ribosomal protein S7	AT2G07696 /// rps7	AT2G07696 /// ATMG01270	1×g-PCB	µ×g-PCB	72.8319	170.562	2.34186	1.22766	0.0241775
260222_at	"XXT5 (XYLOGLUCAN XYLOSYLTRANSFERASE 5); transferase/ transferase, transferring glycosyl groups / xyloglucan 6-xylosyltransferase"	XXT5	AT1G74380	1×g-PCB	µ×g-PCB	1211.54	2836.82	2.3415	1.22743	0.00893101
250485_at	PROPEP5 (Elicitor peptide 5 precursor)	PROPEP5	AT5G09990	1×g-PCB	µ×g-PCB	24.7351	57.86	2.33918	1.226	0.0211615
253684_at	alkaline-phosphatase-like protein	AT4G29690	AT4G29690	1×g-PCB	µ×g-PCB	30.966	72.4263	2.3389	1.22583	0.0461193
254293_at	IQD22 (IQ-domain 22); calmodulin binding	IQD22	AT4G23060	1×g-PCB	µ×g-PCB	684.78	1600.28	2.33692	1.22461	0.0117851
253614_at	double Clp-N motif-containing P-loop nucleoside triphosphate hydrolases superfamily protein	AT4G30350	AT4G30350	1×g-PCB	µ×g-PCB	1590.63	3715.54	2.33589	1.22397	0.00651465
248131_at	DOMON and dopamine beta-monooxygenase N-terminal domain-containing protein	AT5G54830	AT5G54830	1×g-PCB	µ×g-PCB	185.843	433.823	2.33436	1.22303	0.000724177
265831_at	hypothetical protein	AT2G14460	AT2G14460	1×g-PCB	µ×g-PCB	205.299	479.199	2.33415	1.2229	0.00733207
247105_at	DAR5 (DA1-RELATED PROTEIN 5); zinc ion binding	DAR5	AT5G66630	1×g-PCB	µ×g-PCB	285.903	666.966	2.33284	1.22209	0.0232432
249677_at	P-loop containing nucleoside triphosphate hydrolases superfamily protein	AT5G35970	AT5G35970	1×g-PCB	µ×g-PCB	269.531	628.767	2.33282	1.22207	0.0179454
252478_at	ENTH/VHS family protein	AT3G46540	AT3G46540	1×g-PCB	µ×g-PCB	234.345	546.339	2.33134	1.22116	0.00664005
258884_at	OMR1 (L-O-METHYLTHREONINE RESISTANT 1); L-threonine ammonia-lyase	OMR1	AT3G10050	1×g-PCB	µ×g-PCB	89.2814	208.136	2.33123	1.22109	0.0042256
245164_at	HSP60-2 (HEAT SHOCK PROTEIN 60-2); ATP binding	HSP60-2	AT2G33210	1×g-PCB	µ×g-PCB	266.383	620.459	2.32919	1.21983	0.000943763
249386_at	TIR-NBS-LRR class disease resistance protein	AT5G40060	AT5G40060	1×g-PCB	µ×g-PCB	83.1967	193.723	2.3285	1.2194	0.00335517
262450_at	hypothetical protein	AT1G11320	AT1G11320	1×g-PCB	µ×g-PCB	52.5091	122.239	2.32796	1.21907	0.0143915
245956_s_at	BIP2; ATP binding	BIP2	AT5G28540 /// AT5G42020	1×g-PCB	µ×g-PCB	1534.73	3572.47	2.32775	1.21894	0.0178425
255889_at	"WBC11 (WHITE-BROWN COMPLEX HOMOLOG PROTEIN 11); ATPase, coupled to transmembrane movement of substances / fatty acid transporter"	WBC11	AT1G17840	1×g-PCB	µ×g-PCB	717.883	1669.45	2.32552	1.21755	0.0107998
264951_at	Target of Myb protein 1	AT1G76970	AT1G76970	1×g-PCB	µ×g-PCB	653.992	1519.67	2.32369	1.21642	0.00277025
252671_at	FAD/NAD(P)-binding oxidoreductase family protein	AT3G44190	AT3G44190	1×g-PCB	µ×g-PCB	2943.37	6835.52	2.32235	1.21558	0.0154406
250206_at	phosphate transporter 3;1	PHT3;1	AT5G14040	1×g-PCB	µ×g-PCB	1633.37	3792.26	2.32174	1.21521	0.00376646
264904_s_at	NTRA (NADPH-DEPENDENT THIOREDOXIN REDUCTASE A); thioredoxin-disulfide reductase	NTRA	AT2G17420 /// AT4G35460	1×g-PCB	µ×g-PCB	815.913	1892.77	2.31982	1.21401	0.00317514
252973_s_at	ROC1 (ROTAMASE CYP 1); peptidyl-prolyl cis-trans isomerase	ROC1	AT4G38740	1×g-PCB	µ×g-PCB	1962.29	4547.08	2.31723	1.2124	0.0062678
259307_at	Signal peptidase complex subunit 3A	AT3G05230	AT3G05230	1×g-PCB	µ×g-PCB	178.171	412.642	2.31599	1.21163	0.002484
266105_at	SEC61 BETA; protein transporter	SEC61 BETA	AT2G45070	1×g-PCB	µ×g-PCB	1519.87	3519.83	2.31588	1.21156	5.89728e-05
262408_at	putative protein phosphatase 2C 10	AT1G34750	AT1G34750	1×g-PCB	µ×g-PCB	922.712	2134.95	2.31378	1.21025	0.00752067
259354_at	heavy-metal-associated domain-containing protein	AT3G05220	AT3G05220	1×g-PCB	µ×g-PCB	2323.71	5375.74	2.31343	1.21003	0.00521508
255629_at	ATOZI1	ATOZI1	AT4G00860	1×g-PCB	µ×g-PCB	1368.3	3161.84	2.31077	1.20838	0.0008611
264328_at	IAA10; transcription factor	IAA10	AT1G04100	1×g-PCB	µ×g-PCB	127.998	295.418	2.30799	1.20664	0.00415517
246772_at	Integral membrane Yip1 family protein	AT5G27490	AT5G27490	1×g-PCB	µ×g-PCB	68.0517	157.043	2.30771	1.20646	0.0205316
260304_at	hypothetical protein	AT1G70480	AT1G70480	1×g-PCB	µ×g-PCB	657.11	1516.26	2.30746	1.20631	0.00693741
264185_at	thylakoid lumen protein 18.3	TLP18.3	AT1G54780	1×g-PCB	µ×g-PCB	514.324	1186.49	2.30689	1.20595	0.020874
244920_s_at	NADH dehydrogenase subunit 3 /// NADH-ubiquinone oxidoreductase chain 3	ArthMp086 /// AT2G07751	AT2G07751 /// ATMG00990	1×g-PCB	µ×g-PCB	162.89	375.503	2.30526	1.20493	0.0397085
265734_at	hypothetical protein	AT2G01260	AT2G01260	1×g-PCB	µ×g-PCB	210.31	484.748	2.30492	1.20472	0.0253319
262873_at	hypothetical protein	AT1G64700	AT1G64700	1×g-PCB	µ×g-PCB	256.343	590.634	2.30408	1.20419	0.0039656
250660_at	MOS4-associated complex subunit 5C	AT5G07060	AT5G07060	1×g-PCB	µ×g-PCB	19.9855	46.0375	2.30355	1.20386	0.0114011
264402_at	CLPB4 (CASEIN LYTIC PROTEINASE B4); ATP binding / ATPase/ nucleoside-triphosphatase/ nucleotide binding / protein binding	CLPB4	AT2G25140	1×g-PCB	µ×g-PCB	114.869	264.477	2.30243	1.20316	0.00186473
249233_at	Glutathione S-transferase family protein	AT5G42150	AT5G42150	1×g-PCB	µ×g-PCB	335.038	770.308	2.29916	1.20111	0.000551523
258406_at	ATRBL14 (ARABIDOPSIS RHOMBOID-LIKE PROTEIN 14); zinc ion binding	ATRBL14	AT3G17611	1×g-PCB	µ×g-PCB	277.996	637.922	2.29471	1.19831	0.000561668
247610_at	hypothetical protein	AT5G60630	AT5G60630	1×g-PCB	µ×g-PCB	42.8387	98.2738	2.29404	1.19789	0.0175136
255777_at	GR-RBP6 (glycine-rich RNA-binding protein 6); RNA binding / nucleic acid binding / nucleotide binding	GR-RBP6	AT1G18630	1×g-PCB	µ×g-PCB	73.5712	168.775	2.29403	1.19788	0.00669111
249312_at	TIR-NBS-LRR class disease resistance protein	AT5G41550	AT5G41550	1×g-PCB	µ×g-PCB	47.7896	109.594	2.29325	1.1974	0.00598569
262236_at	hypothetical protein	AT1G48330	AT1G48330	1×g-PCB	µ×g-PCB	103.197	236.606	2.29275	1.19708	0.0492493
253339_at	"PAA1 (P-TYPE ATP-ASE 1); ATPase, coupled to transmembrane movement of ions, phosphorylative mechanism / copper ion transmembrane transporter"	PAA1	AT4G33520	1×g-PCB	µ×g-PCB	164.557	377.204	2.29223	1.19675	0.0186433
250875_at	calmodulin-binding protein	AT5G04020	AT5G04020	1×g-PCB	µ×g-PCB	220.19	504.622	2.29176	1.19646	0.00726113
248105_at	FTSZ1-1; protein binding / structural molecule	FTSZ1-1	AT5G55280	1×g-PCB	µ×g-PCB	141.3	323.662	2.29059	1.19572	0.0043725
250141_at	SK13 (SHAGGY-LIKE KINASE 13); ATP binding / protein kinase/ protein serine/threonine kinase	SK13	AT5G14640	1×g-PCB	µ×g-PCB	705.004	1614.73	2.29038	1.19559	0.00617648
260391_at	SS2 (STRICTOSIDINE SYNTHASE 2); strictosidine synthase	SS2	AT1G74020	1×g-PCB	µ×g-PCB	1135.93	2601.03	2.28979	1.19521	0.00184958
263714_at	SUR1 (SUPERROOT 1); S-alkylthiohydroximate lyase/ carbon-sulfur lyase/ transaminase	SUR1	AT2G20610	1×g-PCB	µ×g-PCB	480.606	1099.75	2.28826	1.19425	0.00552535
262061_at	ATPP2-B11 (ARABIDOPSIS THALIANA PHLOEM PROTEIN 2-B11); carbohydrate binding	ATPP2-B11	AT1G80110	1×g-PCB	µ×g-PCB	309.606	708.218	2.28748	1.19376	0.0335674
259228_at	galactose oxidase/kelch repeat-containing protein	AT3G07720	AT3G07720	1×g-PCB	µ×g-PCB	405.196	926.57	2.28672	1.19328	0.0153727
262493_at	Chaperone DnaJ-domain superfamily protein	AT1G21660	AT1G21660	1×g-PCB	µ×g-PCB	424.512	970.026	2.28504	1.19222	0.00205029
249625_at	hypothetical protein	AT5G37480	AT5G37480	1×g-PCB	µ×g-PCB	317.264	724.438	2.28339	1.19118	0.00431694
264852_at	MLO8 (MILDEW RESISTANCE LOCUS O 8); calmodulin binding	MLO8	AT2G17480	1×g-PCB	µ×g-PCB	870.466	1987.57	2.28334	1.19115	0.0154881
256819_at	mitochondrial thiamin diphosphate carrier protein	AT3G21390	AT3G21390	1×g-PCB	µ×g-PCB	215.779	492.524	2.28254	1.19064	0.00702676
257608_at	HSP60-3A (HEAT SHOCK PROTEIN 60-3A); ATP binding / protein binding	HSP60-3A	AT3G13860	1×g-PCB	µ×g-PCB	277.69	633.811	2.28244	1.19058	0.001593
254878_at	AT-HSFB2B; transcription factor/ transcription repressor	AT-HSFB2B	AT4G11660	1×g-PCB	µ×g-PCB	106.645	243.301	2.28141	1.18993	0.00787853
264458_at	hypothetical protein	AT1G10410	AT1G10410	1×g-PCB	µ×g-PCB	1020.45	2327.46	2.28082	1.18955	0.00427365
248568_at	leucine-rich repeat protein kinase-like protein	AT5G49760	AT5G49760	1×g-PCB	µ×g-PCB	713.436	1625.61	2.27856	1.18812	0.0200389
258084_at	protein phosphatase 2A regulatory subunit B' eta	AT3G26020	AT3G26020	1×g-PCB	µ×g-PCB	353.319	803.664	2.27461	1.18562	0.000861435
258971_at	ACR6; amino acid binding	ACR6	AT3G01990	1×g-PCB	µ×g-PCB	56.5047	128.511	2.27435	1.18545	0.031423
245367_at	NRPB9B; DNA binding / DNA-directed RNA polymerase/ nucleic acid binding / transcription regulator/ zinc ion binding	NRPB9B	AT4G16265	1×g-PCB	µ×g-PCB	84.0459	190.9	2.27137	1.18356	0.00648241
251980_at	"Small nuclear RNA activating complex (SNAPc), subunit SNAP43 protein"	AT3G53270	AT3G53270	1×g-PCB	µ×g-PCB	233.038	529.237	2.27103	1.18335	0.00600695
252915_at	SnRK2-interacting calcium sensor SCS	AT4G38810	AT4G38810	1×g-PCB	µ×g-PCB	1426.09	3235.21	2.26859	1.1818	0.0143212
248848_at	TIR-NBS-LRR protein VICTR	AT5G46520	AT5G46520	1×g-PCB	µ×g-PCB	70.977	160.807	2.26563	1.17991	0.000466192
259191_at	hypothetical protein	AT3G01720	AT3G01720	1×g-PCB	µ×g-PCB	363.762	823.975	2.26515	1.17961	0.0111672
264619_at	aspartyl protease family protein	AT2G17760	AT2G17760	1×g-PCB	µ×g-PCB	546.317	1237.44	2.26506	1.17955	0.00182005
250743_at	nucleotide-sugar transporter family protein	AT5G05820	AT5G05820	1×g-PCB	µ×g-PCB	164.573	372.643	2.26431	1.17907	0.0225941
252048_at	aspartyl protease family protein	AT3G52500	AT3G52500	1×g-PCB	µ×g-PCB	766.088	1733.22	2.26243	1.17787	0.0341412
246947_at	CYP71B11; electron carrier/ heme binding / iron ion binding / monooxygenase/ oxygen binding	CYP71B11	AT5G25120	1×g-PCB	µ×g-PCB	92.0298	208.057	2.26076	1.17681	0.023717
250094_at	2-hydroxyacyl-CoA lyase	AT5G17380	AT5G17380	1×g-PCB	µ×g-PCB	790.591	1785.93	2.25898	1.17567	0.00193651
262113_at	late embryogenesis abundant 3-like protein	AT1G02820	AT1G02820	1×g-PCB	µ×g-PCB	82.1196	185.269	2.25609	1.17383	0.0306328
264244_at	ATPANK1 (PANTOTHENATE KINASE 1); pantothenate kinase	ATPANK1	AT1G60440	1×g-PCB	µ×g-PCB	547.733	1234.34	2.25354	1.17219	0.0115105
247918_at	octicosapeptide/Phox/Bem1p domain-containing protein kinase	AT5G57610	AT5G57610	1×g-PCB	µ×g-PCB	372.329	839.031	2.25347	1.17215	0.012158
264200_at	putative neutral invertase	AT1G22650	AT1G22650	1×g-PCB	µ×g-PCB	275.88	621.559	2.25301	1.17185	0.0114431
259343_s_at	AtMS2; 5-methyltetrahydropteroyltriglutamate-homocysteine S-methyltransferase/ methionine synthase	ATMS2	AT3G03780 /// AT5G17920	1×g-PCB	µ×g-PCB	2238.8	5029.72	2.24662	1.16776	0.0242732
252713_at	CAM7 (CALMODULIN 7); calcium ion binding	CAM7	AT3G43810	1×g-PCB	µ×g-PCB	837.901	1882.44	2.24661	1.16775	0.0186515
258588_s_at	GAPC1 (GLYCERALDEHYDE-3-PHOSPHATE DEHYDROGENASE C SUBUNIT 1); glyceraldehyde-3-phosphate dehydrogenase (phosphorylating)/ glyceraldehyde-3-phosphate dehydrogenase	GAPC1	AT3G04120	1×g-PCB	µ×g-PCB	5800.48	13024.6	2.24544	1.167	0.000291973
260501_at	hypothetical protein	AT2G41770	AT2G41770	1×g-PCB	µ×g-PCB	175.593	393.854	2.243	1.16543	0.0282526
266037_at	RPM1-induced protein kinase	AT2G05940	AT2G05940	1×g-PCB	µ×g-PCB	2280.6	5115.08	2.24287	1.16534	0.0308637
262054_s_at	HSP91; ATP binding	HSP91	AT1G79920 /// AT1G79930	1×g-PCB	µ×g-PCB	1189.11	2664.98	2.24115	1.16424	3.70112e-05
262163_at	60S ribosomal protein L30-2	AT1G77940	AT1G77940	1×g-PCB	µ×g-PCB	1577.92	3534.5	2.23997	1.16348	0.0179455
253013_at	mtHsc70-1 (mitochondrial heat shock protein 70-1); ATP binding	mtHsc70-1	AT4G37910	1×g-PCB	µ×g-PCB	1314.39	2942.21	2.23846	1.16251	0.00622017
259277_at	"AtSS2 (starch synthase 2); transferase, transferring glycosyl groups"	AtSS2	AT3G01180	1×g-PCB	µ×g-PCB	108.714	243.201	2.23708	1.16162	0.00815788
257820_at	FKBP15-1; FK506 binding / peptidyl-prolyl cis-trans isomerase	FKBP15-1	AT3G25220	1×g-PCB	µ×g-PCB	405.327	906.025	2.23529	1.16046	0.0391054
248042_at	hypothetical protein	AT5G55960	AT5G55960	1×g-PCB	µ×g-PCB	347.348	775.624	2.23298	1.15897	0.038357
262459_at	eukaryotic porin family protein	AT1G50400	AT1G50400	1×g-PCB	µ×g-PCB	74.7061	166.768	2.23233	1.15855	0.00439291
257713_at	SDH2-1; electron carrier/ succinate dehydrogenase	SDH2-1	AT3G27380	1×g-PCB	µ×g-PCB	1049.52	2341.35	2.23088	1.15761	0.00191029
256042_at	hypothetical protein	AT1G07220	AT1G07220	1×g-PCB	µ×g-PCB	249.143	555.257	2.22867	1.15618	0.034629
259548_at	MLP165 (MLP-LIKE PROTEIN 165)	MLP165	AT1G35260	1×g-PCB	µ×g-PCB	53.2662	118.685	2.22814	1.15584	0.0212671
264757_at	G-type lectin S-receptor-like serine/threonine-protein kinase	AT1G61360	AT1G61360	1×g-PCB	µ×g-PCB	1118.54	2492.04	2.22794	1.15571	0.00391267
265233_s_at	hypothetical protein /// Cytochrome b/b6 protein	ArthMp052 /// AT2G07718	AT2G07718 /// ATMG00590	1×g-PCB	µ×g-PCB	691.196	1539.23	2.22691	1.15504	0.0143882
245685_at	E2F1; DNA binding / protein binding / transcription factor	E2F1	AT5G22220	1×g-PCB	µ×g-PCB	72.2152	160.673	2.22491	1.15375	0.00184377
247566_at	40S ribosomal protein S19-3	AT5G61170	AT5G61170	1×g-PCB	µ×g-PCB	1271.02	2824.12	2.22193	1.15181	0.00197081
266857_at	sodium/pyruvate cotransporter BASS2	AT2G26900	AT2G26900	1×g-PCB	µ×g-PCB	292.335	649.162	2.22061	1.15096	0.0396412
266015_at	Short-chain dehydrogenase/reductase 2	AT2G24190	AT2G24190	1×g-PCB	µ×g-PCB	56.5128	125.446	2.21978	1.15042	0.0236881
256107_at	pentatricopeptide repeat-containing protein	AT1G16830	AT1G16830	1×g-PCB	µ×g-PCB	39.6913	88.1012	2.21966	1.15034	0.040634
244999_at	RNA polymerase beta chain	rpoB	ATCG00190	1×g-PCB	µ×g-PCB	30.2058	67.0377	2.21937	1.15015	0.0133381
248841_at	UBP21 (UBIQUITIN-SPECIFIC PROTEASE 21); ubiquitin thiolesterase/ ubiquitin-specific protease	UBP21	AT5G46740	1×g-PCB	µ×g-PCB	79.5812	176.615	2.2193	1.15011	0.0242799
254389_s_at	mate efflux domain-containing protein /// MATE efflux family protein	AT4G21903 /// AT4G21910	AT4G21903 /// AT4G21910	1×g-PCB	µ×g-PCB	281.322	624.183	2.21875	1.14975	0.00285317
251902_at	PUMP1 (PLANT UNCOUPLING MITOCHONDRIAL PROTEIN 1); binding / oxidative phosphorylation uncoupler	PUMP1	AT3G54110	1×g-PCB	µ×g-PCB	812.36	1799.79	2.21551	1.14764	0.00554703
262776_at	eukaryotic initiation factor 4B2	EIF4B2	AT1G13020	1×g-PCB	µ×g-PCB	309.369	685.005	2.2142	1.14679	0.0015207
264809_at	CSD1 (COPPER/ZINC SUPEROXIDE DISMUTASE 1); superoxide dismutase	CSD1	AT1G08830	1×g-PCB	µ×g-PCB	4549.95	10070.2	2.21324	1.14616	0.000898165
264663_at	LRR XI-23; ATP binding / kinase/ protein kinase/ protein serine/threonine kinase	LRR XI-23	AT1G09970	1×g-PCB	µ×g-PCB	4024.72	8905.31	2.21265	1.14578	0.000554716
245061_at	"RCA (RUBISCO ACTIVASE); ADP binding / ATP binding / enzyme regulator/ ribulose-1,5-bisphosphate carboxylase/oxygenase activator"	RCA	AT2G39730	1×g-PCB	µ×g-PCB	5724.86	12665	2.21228	1.14553	0.0147734
264466_at	putative membrane lipoprotein	AT1G10380	AT1G10380	1×g-PCB	µ×g-PCB	67.374	149.042	2.21217	1.14546	0.000841462
258744_at	alpha-helical IF-like protein	AT3G05830	AT3G05830	1×g-PCB	µ×g-PCB	185.144	408.83	2.20817	1.14285	0.0169336
258118_at	RNI-like superfamily protein	AT3G14710	AT3G14710	1×g-PCB	µ×g-PCB	35.4873	78.3314	2.20731	1.14229	0.0377668
263399_at	hypothetical protein	AT2G31490	AT2G31490	1×g-PCB	µ×g-PCB	552.294	1218.98	2.20711	1.14216	0.00672942
259969_at	pyrophosphate--fructose-6-phosphate 1-phosphotransferase	AT1G76550	AT1G76550	1×g-PCB	µ×g-PCB	397.947	877.782	2.20578	1.14129	0.00631707
267335_s_at	O-glycosyl hydrolases family 17 protein /// O-Glycosyl hydrolases family 17 protein	AT1G64760 /// AT2G19440	AT1G64760 /// AT2G19440	1×g-PCB	µ×g-PCB	248.106	547.102	2.20511	1.14085	0.00306569
262572_at	FAD/NAD(P)-binding oxidoreductase	AT1G15140	AT1G15140	1×g-PCB	µ×g-PCB	442.474	975.631	2.20494	1.14074	0.00234652
254014_at	regulatory protein NPR2	AT4G26120	AT4G26120	1×g-PCB	µ×g-PCB	110.526	243.639	2.20435	1.14036	0.00139111
246402_at	jacalin-like plant lectin domain-containing protein	AT1G57570	AT1G57570	1×g-PCB	µ×g-PCB	13.0093	28.6605	2.20307	1.13952	0.00516824
246094_at	hypothetical protein	AT5G19300	AT5G19300	1×g-PCB	µ×g-PCB	69.0546	151.782	2.19801	1.13619	0.0124076
261676_at	shewenella-like protein phosphatase 2	AT1G18480	AT1G18480	1×g-PCB	µ×g-PCB	397.657	873.787	2.19734	1.13576	0.00583331
263553_at	PAP10 (PURPLE ACID PHOSPHATASE 10); acid phosphatase/ protein serine/threonine phosphatase	PAP10	AT2G16430	1×g-PCB	µ×g-PCB	274.452	602.994	2.19709	1.13559	0.00361512
246222_at	RAP2.10 (related to AP2 10); DNA binding / transcription factor	RAP2.10	AT4G36900	1×g-PCB	µ×g-PCB	336.402	738.535	2.1954	1.13448	0.0362331
252076_at	Tautomerase/MIF superfamily protein	AT3G51660	AT3G51660	1×g-PCB	µ×g-PCB	754.629	1655.95	2.19439	1.13382	0.000917802
250343_at	translation initiation factor SUI1 family protein	AT5G11900	AT5G11900	1×g-PCB	µ×g-PCB	318.334	698.082	2.19292	1.13286	0.000765209
249639_at	TIR-NBS-LRR class disease resistance protein	AT5G36930	AT5G36930	1×g-PCB	µ×g-PCB	62.2285	136.395	2.19184	1.13214	0.0130514
247593_at	ATGCN1; transporter	GCN1	AT5G60790	1×g-PCB	µ×g-PCB	3440.17	7539.12	2.1915	1.13192	0.00534276
254341_at	SRF8 (STRUBBELIG-RECEPTOR FAMILY 8); ATP binding / kinase/ protein binding / protein kinase	SRF8	AT4G22130	1×g-PCB	µ×g-PCB	114.752	251.233	2.18936	1.13051	0.0296713
246528_at	mitochondrial substrate carrier family protein	AT5G15640	AT5G15640	1×g-PCB	µ×g-PCB	495.318	1084.03	2.18855	1.12997	0.00102543
253607_at	small nuclear ribonucleoprotein E	AT4G30330	AT4G30330	1×g-PCB	µ×g-PCB	85.4497	186.803	2.18612	1.12837	0.043699
263924_at	LOS2; copper ion binding / phosphopyruvate hydratase	LOS2	AT2G36530	1×g-PCB	µ×g-PCB	3647.09	7967.37	2.18458	1.12736	0.000467912
262551_at	RUB1 (RELATED TO UBIQUITIN 1); protein binding	RUB1	---	1×g-PCB	µ×g-PCB	216.954	473.413	2.18208	1.12571	0.0123313
248378_at	hypothetical protein	AT5G51840	AT5G51840	1×g-PCB	µ×g-PCB	107.843	235.159	2.18056	1.1247	0.0331575
261655_at	peptidyl-prolyl cis-trans isomerase-like 3	AT1G01940	AT1G01940	1×g-PCB	µ×g-PCB	216.886	472.328	2.17777	1.12285	0.00855989
265214_at	atypical dual-speci###city phosphatase 1	AT1G05000	AT1G05000	1×g-PCB	µ×g-PCB	85.3096	185.736	2.1772	1.12248	0.0369553
258544_at	RPM1 (RESISTANCE TO P. SYRINGAE PV MACULICOLA 1); nucleotide binding / protein binding	RPM1	AT3G07040	1×g-PCB	µ×g-PCB	221.809	482.386	2.17478	1.12087	0.0228271
254083_at	transport protein sec61 subunit gamma-1 /// protein transport protein sec61 subunit gamma-2	AT4G24920 /// AT5G50460	AT4G24920	1×g-PCB	µ×g-PCB	2402.83	5223.61	2.17394	1.12031	0.00059973
248258_at	protein BOBBER 1	BOB1	AT5G53400	1×g-PCB	µ×g-PCB	614.328	1335.35	2.17367	1.12013	0.00410714
259105_at	Rubber elongation factor protein	AT3G05500	AT3G05500	1×g-PCB	µ×g-PCB	5188.28	11271.4	2.17248	1.11934	0.0144
251964_at	DNA-binding protein S1FA1	AT3G53370	AT3G53370	1×g-PCB	µ×g-PCB	69.932	151.878	2.1718	1.11889	0.0321569
260255_at	putative serine/threonine kinase	AT1G74330	AT1G74330	1×g-PCB	µ×g-PCB	99.9368	216.918	2.17055	1.11806	0.00751637
250369_at	CYC3B (MITOTIC-LIKE CYCLIN 3B FROM ARABIDOPSIS); cyclin-dependent protein kinase regulator	CYC3B	AT5G11300	1×g-PCB	µ×g-PCB	60.0097	130.211	2.16983	1.11758	0.0205598
246385_at	CYCA1;2 (CYCLIN A1;2); cyclin-dependent protein kinase regulator	CYCA1;2	AT1G77390	1×g-PCB	µ×g-PCB	75.9896	164.786	2.16853	1.11672	0.0126743
258576_at	40S ribosomal protein S16-2	AT3G04230	AT3G04230	1×g-PCB	µ×g-PCB	574.171	1244.66	2.16775	1.1162	0.00132946
263599_at	WOL (WOODEN LEG); cytokinin receptor/ osmosensor/ phosphoprotein phosphatase/ protein histidine kinase	WOL	AT2G01830	1×g-PCB	µ×g-PCB	58.1061	125.948	2.16756	1.11607	0.00395332
257606_at	RHD3 (ROOT HAIR DEFECTIVE 3); GTP binding	RHD3	AT3G13870	1×g-PCB	µ×g-PCB	1152.99	2497.84	2.1664	1.1153	0.00669568
256134_at	"AAPT1 (AMINOALCOHOLPHOSPHOTRANSFERASE 1); phosphatidyltransferase/ phosphotransferase, for other substituted phosphate groups"	AAPT1	AT1G13560	1×g-PCB	µ×g-PCB	1460.92	3164.62	2.16618	1.11515	0.021167
257071_at	"ATCSLC04 (CELLULOSE-SYNTHASE LIKE C4); cellulose synthase/ transferase, transferring glycosyl groups"	ATCSLC04	AT3G28180	1×g-PCB	µ×g-PCB	1125.52	2435.82	2.16418	1.11382	0.00973201
266780_at	ATGLR2.8; intracellular ligand-gated ion channel	ATGLR2.8	AT2G29110	1×g-PCB	µ×g-PCB	37.0111	80.0706	2.16342	1.11332	0.0413914
262677_at	hypothetical protein	AT1G75860	AT1G75860	1×g-PCB	µ×g-PCB	2016.14	4357.92	2.16152	1.11204	0.0234923
262094_at	NOP56 (Arabidopsis homolog of nucleolar protein Nop56)	NOP56	AT1G56110	1×g-PCB	µ×g-PCB	514.06	1110.56	2.16038	1.11128	0.00827191
264522_at	putative glycosyl hydrolase	AT1G10050	AT1G10050	1×g-PCB	µ×g-PCB	164.457	355.212	2.15991	1.11097	0.00914831
252751_at	RING/U-box domain-containing protein	AT3G43430	AT3G43430	1×g-PCB	µ×g-PCB	120.827	260.9	2.15929	1.11056	0.0357123
245432_at	hypothetical protein	AT4G17100	AT4G17100	1×g-PCB	µ×g-PCB	263.783	569.465	2.15884	1.11025	0.00369097
249918_at	GPI-anchored glycoprotein membrane precursor	AT5G19240	AT5G19240	1×g-PCB	µ×g-PCB	6017.45	12982.8	2.15753	1.10938	0.00472457
253500_at	ARR10 (ARABIDOPSIS RESPONSE REGULATOR 10); transcription factor/ two-component response regulator	ARR10	AT4G31920	1×g-PCB	µ×g-PCB	168.526	363.357	2.15608	1.10841	0.00307843
248485_at	mitochondrial substrate carrier family protein	AT5G51050	AT5G51050	1×g-PCB	µ×g-PCB	158.322	341.328	2.15591	1.10829	0.00380599
254610_at	BES1/BZR1-like protein 3	BEH3	AT4G18890	1×g-PCB	µ×g-PCB	399.225	859.507	2.15294	1.10631	0.0267006
259876_at	chaperone protein dnaJ 10	AT1G76700	AT1G76700	1×g-PCB	µ×g-PCB	668.864	1439.81	2.15262	1.10609	0.00125191
253407_at	glycine-rich protein	AT4G32920	AT4G32920	1×g-PCB	µ×g-PCB	208.77	449.28	2.15203	1.1057	0.00295578
266528_at	TIR-NBS-LRR class disease resistance protein	AT2G16870	AT2G16870	1×g-PCB	µ×g-PCB	44.3044	95.34	2.15193	1.10563	0.00053594
255554_at	hypothetical protein	AT4G01897	AT4G01897	1×g-PCB	µ×g-PCB	85.977	185.007	2.15182	1.10556	0.00205622
264484_at	putative methyltransferase PMT10	AT1G77260	AT1G77260	1×g-PCB	µ×g-PCB	269.751	580.088	2.15046	1.10464	0.0177401
250670_at	PGIP1 (POLYGALACTURONASE INHIBITING PROTEIN 1); protein binding	PGIP1	AT5G06860	1×g-PCB	µ×g-PCB	856.28	1840.83	2.14981	1.10421	0.00485239
246498_at	acyl-[acyl-carrier-protein] desaturase	AT5G16230	AT5G16230	1×g-PCB	µ×g-PCB	57.5476	123.571	2.14727	1.10251	0.0297005
265073_at	"ZKT protein containing PDZ, K-box and a TPR region"	ZKT	AT1G55480	1×g-PCB	µ×g-PCB	149.545	321.05	2.14685	1.10222	0.0508951
265384_at	Clathrin light chain protein	AT2G20760	AT2G20760	1×g-PCB	µ×g-PCB	913.15	1957.33	2.14349	1.09996	0.00756128
248556_at	hypothetical protein	AT5G50350	AT5G50350	1×g-PCB	µ×g-PCB	120.384	257.843	2.14184	1.09885	0.00093101
257212_at	GroES-like zinc-binding alcohol dehydrogenase family protein	AT3G15090	AT3G15090	1×g-PCB	µ×g-PCB	124.877	267.374	2.1411	1.09835	0.0099779
262360_at	PEPR1 (PEP1 receptor 1); ATP binding / kinase/ protein binding / protein serine/threonine kinase	PEPR1	AT1G73080	1×g-PCB	µ×g-PCB	3284.86	7032.12	2.14077	1.09813	0.0106132
265959_at	Thioredoxin superfamily protein	AT2G37240	AT2G37240	1×g-PCB	µ×g-PCB	153.683	328.893	2.14007	1.09766	0.0307197
262882_at	CYP89A2 (CYTOCHROME P450 89A2); electron carrier/ heme binding / iron ion binding / monooxygenase/ oxygen binding	CYP89A2	AT1G64900	1×g-PCB	µ×g-PCB	285.145	610.05	2.13944	1.09723	0.00730077
256224_at	ATSAR1B (SECRETION-ASSOCIATED RAS 1 B); GTP binding	ATSAR1B	AT1G56330	1×g-PCB	µ×g-PCB	1268.63	2706.11	2.13309	1.09295	0.0105294
253309_at	"CER4 (ECERIFERUM 4); fatty acyl-CoA reductase (alcohol-forming)/ oxidoreductase, acting on the CH-CH group of donors"	CER4	AT4G33790	1×g-PCB	µ×g-PCB	41.7045	88.9434	2.1327	1.09268	0.0255086
267073_at	ubiquitin-associated protein	AT2G41160	AT2G41160	1×g-PCB	µ×g-PCB	374.744	799.045	2.13225	1.09237	1.07429e-05
247532_at	U-box domain-containing protein 51	AT5G61560	AT5G61560	1×g-PCB	µ×g-PCB	638.655	1360.41	2.13012	1.09093	0.0134524
264107_s_at	SERK5 (SOMATIC EMBRYOGENESIS RECEPTOR-LIKE KINASE 5); ATP binding / protein kinase/ transmembrane receptor protein serine/threonine kinase	SERK5	AT2G13790 /// AT2G13800	1×g-PCB	µ×g-PCB	2749.2	5854.43	2.1295	1.09051	0.00114095
251470_at	RabGAP/TBC domain-containing protein	AT3G59570	AT3G59570	1×g-PCB	µ×g-PCB	56.2645	119.81	2.1294	1.09045	0.000362563
250562_at	TOM5 (MITOCHONDRIAL IMPORT RECEPTOR SUBUNIT TOM5 HOMOLOG)	TOM5	AT5G08040	1×g-PCB	µ×g-PCB	541.293	1152.62	2.12939	1.09044	0.00335159
254204_at	lysophosphatidic acid acyltransferase	AT4G24160	AT4G24160	1×g-PCB	µ×g-PCB	1611.35	3423.39	2.12455	1.08716	0.00167184
248739_at	GFA2 (GAMETOPHYTIC FACTOR 2); heat shock protein binding / unfolded protein binding	GFA2	AT5G48030	1×g-PCB	µ×g-PCB	286.332	607.843	2.12286	1.08601	0.00216665
251509_at	pectinesterase 35	PME61	AT3G59010	1×g-PCB	µ×g-PCB	51.2342	108.754	2.12268	1.08589	0.0138955
247304_at	AAP4; acidic amino acid transmembrane transporter/ amino acid transmembrane transporter/ neutral amino acid transmembrane transporter/ primary active transmembrane transporter	AAP4	AT5G63850	1×g-PCB	µ×g-PCB	449.735	954.34	2.122	1.08543	0.0215037
259475_at	hypothetical protein	AT1G19140	AT1G19140	1×g-PCB	µ×g-PCB	151.92	322.046	2.11983	1.08395	0.00968444
252939_at	NmrA-like negative transcriptional regulator family protein	AT4G39230	AT4G39230	1×g-PCB	µ×g-PCB	463.547	981.144	2.1166	1.08175	0.0309669
264102_at	ECT8 (evolutionarily conserved C-terminal region 8)	ECT8	AT1G79270	1×g-PCB	µ×g-PCB	1554.63	3288.06	2.11501	1.08067	0.00536461
261795_at	magnesium transporter MRS2-1	MGT2	AT1G16010	1×g-PCB	µ×g-PCB	1019.04	2154.19	2.11394	1.07993	0.00124875
249828_at	Succinyl-CoA ligase [GDP-forming] subunit alpha-2	AT5G23250	AT5G23250	1×g-PCB	µ×g-PCB	252.454	533.161	2.11192	1.07855	0.00954657
254601_at	CMT2 (chromomethylase 2); DNA binding / chromatin binding	CMT2	AT4G19020	1×g-PCB	µ×g-PCB	49.06	103.585	2.1114	1.0782	0.0256883
251181_at	plant invertase/pectin methylesterase inhibitor superfamily protein	AT3G62820	AT3G62820	1×g-PCB	µ×g-PCB	204.577	431.919	2.11127	1.07811	0.0168047
248123_at	ankyrin repeat-containing protein	AT5G54720	AT5G54720	1×g-PCB	µ×g-PCB	121.164	255.77	2.11094	1.07788	0.000404665
265032_at	RPL3B (R-PROTEIN L3 B); structural constituent of ribosome	RPL3B	AT1G61580	1×g-PCB	µ×g-PCB	97.3398	205.361	2.10973	1.07706	0.00696943
267060_at	hypothetical protein	AT2G32580	AT2G32580	1×g-PCB	µ×g-PCB	405.466	855.412	2.1097	1.07704	0.0306107
256441_at	phosphoglucan phosphatase LSF2	AT3G10940	AT3G10940	1×g-PCB	µ×g-PCB	51.3186	108.137	2.10717	1.07531	0.0336841
250995_at	HSC70-1 (HEAT SHOCK COGNATE PROTEIN 70-1); ATP binding	HSC70-1	AT5G02500	1×g-PCB	µ×g-PCB	12017.3	25292.2	2.10466	1.07359	0.00116497
265735_at	fructose-bisphosphate aldolase 3	AT2G01140	AT2G01140	1×g-PCB	µ×g-PCB	885.659	1863.76	2.10437	1.07339	0.00915689
250800_at	HPR; glycerate dehydrogenase/ poly(U) binding	HPR	AT5G05370	1×g-PCB	µ×g-PCB	911.809	1915.35	2.1006	1.0708	0.00667053
251422_at	"Preprotein translocase Sec, Sec61-beta subunit protein"	AT3G60540	AT3G60540	1×g-PCB	µ×g-PCB	143.093	300.579	2.10058	1.07079	0.0139025
265026_at	3-oxoacyl-[acyl-carrier-protein] reductase	AT1G24360	AT1G24360	1×g-PCB	µ×g-PCB	1063.71	2234.31	2.10049	1.07072	0.00316701
251134_at	AtQSOX2 (quiescin-sulfhydryl oxidase 2); thiol oxidase	AtQSOX2	AT5G01270	1×g-PCB	µ×g-PCB	210.205	441.247	2.09913	1.06979	0.0276987
263250_at	probable fructokinase-1	AT2G31390	AT2G31390	1×g-PCB	µ×g-PCB	804.149	1687.97	2.09908	1.06976	0.0101849
245309_at	hypothetical protein	AT4G15140	AT4G15140	1×g-PCB	µ×g-PCB	159.423	334.512	2.09827	1.0692	0.0133533
266166_at	UDP-glycosyltransferase 86A2	AT2G28080	AT2G28080	1×g-PCB	µ×g-PCB	397.799	834.491	2.09777	1.06886	0.0140256
260288_at	Major facilitator superfamily protein	AT1G80530	AT1G80530	1×g-PCB	µ×g-PCB	760.355	1595.02	2.09773	1.06883	0.000569169
266059_at	hypothetical protein	AT2G40765	AT2G40765	1×g-PCB	µ×g-PCB	631.131	1323.42	2.0969	1.06826	0.00270596
264198_at	S-adenosyl-L-methionine-dependent methyltransferases-like protein	AT1G22800	AT1G22800	1×g-PCB	µ×g-PCB	75.3256	157.881	2.09599	1.06763	0.00430292
254952_at	UGE5 (UDP-D-glucose/UDP-D-galactose 4-epimerase 5); UDP-glucose 4-epimerase/ protein dimerization	UGE5	AT4G10955 /// AT4G10960	1×g-PCB	µ×g-PCB	619.175	1297.57	2.09565	1.0674	0.0338913
245566_at	---	---	AT4G14610	1×g-PCB	µ×g-PCB	99.848	209.24	2.09559	1.06736	0.0451352
262611_at	GCK domain-containing protein	AT1G14060	AT1G14060	1×g-PCB	µ×g-PCB	136.205	285.351	2.09501	1.06695	0.00489667
246035_at	Succinyl-CoA ligase [GDP-forming] subunit alpha-1	AT5G08300	AT5G08300	1×g-PCB	µ×g-PCB	1114.07	2331.73	2.09298	1.06556	0.00715852
249021_at	Nucleotide-diphospho-sugar transferase family protein	AT5G44820	AT5G44820	1×g-PCB	µ×g-PCB	183.922	384.923	2.09286	1.06548	0.00836649
245540_at	"PDR2 (PLEIOTROPIC DRUG RESISTANCE 2); ATPase, coupled to transmembrane movement of substances"	PDR2	AT4G15230	1×g-PCB	µ×g-PCB	58.6207	122.621	2.09178	1.06473	0.0263544
261979_at	NIA2 (NITRATE REDUCTASE 2); nitrate reductase (NADH)/ nitrate reductase	NIA2	AT1G37130	1×g-PCB	µ×g-PCB	2626.35	5488.53	2.08979	1.06336	0.0217625
246565_at	BCCP2 (BIOTIN CARBOXYL CARRIER PROTEIN 2); biotin binding	BCCP2	AT5G15530	1×g-PCB	µ×g-PCB	59.5712	124.49	2.08978	1.06335	0.0324804
250100_at	GLN1;4; glutamate-ammonia ligase	GLN1;4	AT5G16570	1×g-PCB	µ×g-PCB	66.6395	139.258	2.08973	1.06331	0.0231942
263533_at	"TIC55 (TRANSLOCON AT THE INNER ENVELOPE MEMBRANE OF CHLOROPLASTS 55); 2 iron, 2 sulfur cluster binding / electron carrier/ oxidoreductase"	TIC55	AT2G24820	1×g-PCB	µ×g-PCB	415.274	867.646	2.08933	1.06304	0.00542344
250289_at	GSH-induced LITAF domain protein	AT5G13190	AT5G13190	1×g-PCB	µ×g-PCB	8252.74	17242.6	2.08932	1.06303	0.0198411
264488_s_at	ribosome associated membrane protein RAMP4 /// ribosome associated membrane protein RAMP4	AT1G27330 /// AT1G27350	AT1G27330 /// AT1G27350	1×g-PCB	µ×g-PCB	1086.19	2268.99	2.08895	1.06278	0.0112606
252310_at	RabGAP/TBC domain-containing protein	AT3G49350	AT3G49350	1×g-PCB	µ×g-PCB	616.855	1288.15	2.08825	1.06229	0.00122784
248101_at	co-chaperone GrpE family protein	AT5G55200	AT5G55200	1×g-PCB	µ×g-PCB	252.828	527.951	2.08818	1.06225	0.0100101
255233_at	adrenodoxin-like ferredoxin 2	MFDX1	AT4G05450	1×g-PCB	µ×g-PCB	131.099	273.695	2.0877	1.06191	0.00896801
258532_at	60S ribosomal protein L29-1	AT3G06700	AT3G06700	1×g-PCB	µ×g-PCB	1260.88	2625.85	2.08255	1.05835	0.010796
249441_at	AIG2-like protein	AT5G39730	AT5G39730	1×g-PCB	µ×g-PCB	879.3	1830.36	2.08162	1.0577	0.0152683
252022_at	fructose-bisphosphate aldolase	AT3G52930	AT3G52930	1×g-PCB	µ×g-PCB	4866.1	10127.7	2.08127	1.05747	0.00328912
255456_at	hypothetical protein	AT4G02920	AT4G02920	1×g-PCB	µ×g-PCB	824.718	1715.94	2.08064	1.05703	0.00941981
263498_at	LSH10 (LIGHT SENSITIVE HYPOCOTYLS 10)	LSH10	AT2G42610	1×g-PCB	µ×g-PCB	551.323	1146.82	2.08012	1.05667	0.0397232
266097_at	SOUL-1; binding	SOUL-1	AT2G37970	1×g-PCB	µ×g-PCB	4328.51	9003.18	2.07997	1.05656	0.0125556
258551_at	hypothetical protein	AT3G06890	AT3G06890	1×g-PCB	µ×g-PCB	508.95	1058.47	2.07971	1.05638	0.0228521
252099_at	Senescence/dehydration-associated protein-like protein	AT3G51250	AT3G51250	1×g-PCB	µ×g-PCB	194.21	403.106	2.07562	1.05354	0.0288373
259130_at	60S ribosomal protein L39-2	AT3G02190	AT3G02190	1×g-PCB	µ×g-PCB	413.935	858.631	2.07431	1.05263	0.0023678
246376_at	IAA18 (INDOLE-3-ACETIC ACID INDUCIBLE 18); transcription factor	IAA18	AT1G51950	1×g-PCB	µ×g-PCB	2791.49	5789.89	2.07412	1.0525	0.035086
261525_at	galactose oxidase/kelch repeat superfamily protein	AT1G14330	AT1G14330	1×g-PCB	µ×g-PCB	577.364	1197.23	2.07362	1.05215	0.0109755
258724_at	MYB-like transcription factor	AT3G09600	AT3G09600	1×g-PCB	µ×g-PCB	108.834	225.318	2.07029	1.04983	0.0237086
253512_at	WIN2 (HOPW1-1-INTERACTING 2); protein serine/threonine phosphatase	WIN2	AT4G31750	1×g-PCB	µ×g-PCB	306.403	634.053	2.06934	1.04917	0.00510359
265629_at	LHW (LONESOME HIGHWAY); protein homodimerization/ transcription activator/ transcription factor	LHW	AT2G27228 /// AT2G27230	1×g-PCB	µ×g-PCB	250.112	517.318	2.06835	1.04848	0.00387777
259461_at	pentatricopeptide repeat-containing protein	AT1G18900	AT1G18900	1×g-PCB	µ×g-PCB	290.726	600.102	2.06415	1.04555	0.00380226
264725_at	hypothetical protein	AT1G22885	AT1G22885	1×g-PCB	µ×g-PCB	688.64	1420.3	2.06247	1.04437	0.0111739
257088_at	transmembrane protein 14C	AT3G20510	AT3G20510	1×g-PCB	µ×g-PCB	2719.13	5601.74	2.06012	1.04273	0.00664899
264465_at	ASK18 (ARABIDOPSIS SKP1-LIKE 18); protein binding / ubiquitin-protein ligase	ASK18	AT1G10230	1×g-PCB	µ×g-PCB	122.646	252.502	2.05878	1.04179	0.0064099
246612_at	hypothetical protein	AT5G35320	AT5G35320	1×g-PCB	µ×g-PCB	446.095	917.931	2.0577	1.04103	0.00570944
249112_at	APS4; sulfate adenylyltransferase (ATP)	APS4	AT5G43780	1×g-PCB	µ×g-PCB	816.507	1679.55	2.057	1.04054	0.00769074
258184_at	AHP1 (HISTIDINE-CONTAINING PHOSPHOTRANSMITTER 1); histidine phosphotransfer kinase	AHP1	AT3G21510	1×g-PCB	µ×g-PCB	91.3902	187.871	2.0557	1.03963	0.010201
254080_at	FIB2 (FIBRILLARIN 2); snoRNA binding	FIB2	AT4G25630	1×g-PCB	µ×g-PCB	308.558	632.771	2.05073	1.03614	0.0255306
244909_at	hypothetical protein	ArthMp066	ATMG00740	1×g-PCB	µ×g-PCB	36.1288	73.9951	2.04809	1.03428	0.0143937
250545_at	ATPK3; ATP binding / kinase/ protein kinase/ protein serine/threonine kinase	ATPK3	AT5G08160	1×g-PCB	µ×g-PCB	384.074	786.529	2.04786	1.03411	0.0262146
248996_at	RRS1 (RESISTANT TO RALSTONIA SOLANACEARUM 1); DNA binding / transcription factor	RRS1	AT5G45260	1×g-PCB	µ×g-PCB	176.69	361.774	2.0475	1.03387	0.0357889
256964_at	AGP12 (ARABINOGALACTAN PROTEIN 12)	AGP12	AT3G13520	1×g-PCB	µ×g-PCB	6039.47	12363.5	2.04711	1.03359	0.0275819
254693_at	transcription factor MYC4	AT4G17880	AT4G17880	1×g-PCB	µ×g-PCB	134.73	275.359	2.04379	1.03125	0.00115178
263060_s_at	hypothetical protein /// hypothetical protein	ArthMp080 /// AT2G07773	AT2G07773 /// ATMG00910	1×g-PCB	µ×g-PCB	67.5932	138.061	2.04253	1.03036	0.0481132
251544_at	"GAUT15 (Galacturonosyltransferase 15); polygalacturonate 4-alpha-galacturonosyltransferase/ transferase, transferring glycosyl groups / transferase, transferring hexosyl groups"	GAUT15	AT3G58790	1×g-PCB	µ×g-PCB	527.488	1076.84	2.04146	1.0296	0.040603
266416_at	AMMECR1 family protein	AT2G38710	AT2G38710	1×g-PCB	µ×g-PCB	431.688	880.943	2.04069	1.02906	0.00116749
262219_at	pentatricopeptide repeat-containing protein	AT1G74750	AT1G74750	1×g-PCB	µ×g-PCB	104.825	213.815	2.03973	1.02838	0.00125195
267023_at	SecY protein transport family protein	AT2G34250	AT2G34250	1×g-PCB	µ×g-PCB	2591.91	5286.17	2.03949	1.02821	0.00037599
254034_at	"PGP2 (P-GLYCOPROTEIN 2); ATPase, coupled to transmembrane movement of substances"	PGP2	AT4G25960	1×g-PCB	µ×g-PCB	442.162	901.57	2.039	1.02786	0.0267557
264867_at	FH4 (FORMIN HOMOLOGUE 4); actin binding / protein binding	FH4	AT1G24150	1×g-PCB	µ×g-PCB	358.174	729.001	2.03533	1.02526	0.00092241
260761_at	hypothetical protein	AT1G49150	AT1G49150	1×g-PCB	µ×g-PCB	25.5389	51.9653	2.03475	1.02485	0.0272764
266799_at	ATPSK2 (PHYTOSULFOKINE 2 PRECURSOR); growth factor	ATPSK2	AT2G22860	1×g-PCB	µ×g-PCB	3142.49	6392.96	2.03436	1.02458	0.0104064
256259_at	"polynucleotidyl transferase, ribonuclease H-like superfamily protein"	AT3G12460	AT3G12460	1×g-PCB	µ×g-PCB	30.7978	62.649	2.0342	1.02447	0.0195762
267556_at	BGAL9 (Beta galactosidase 9); beta-galactosidase/ catalytic/ cation binding / sugar binding	BGAL9	AT2G32810	1×g-PCB	µ×g-PCB	208.302	423.718	2.03415	1.02442	0.0273294
258638_at	rhomboid protein-like protein	AT3G07950	AT3G07950	1×g-PCB	µ×g-PCB	266.927	542.824	2.0336	1.02404	0.012684
260896_at	SecY protein transport family protein	AT1G29310	AT1G29310	1×g-PCB	µ×g-PCB	270.476	549.979	2.03337	1.02387	0.0070692
256188_at	hypothetical protein	AT1G30160	AT1G30160	1×g-PCB	µ×g-PCB	204.318	415.389	2.03305	1.02365	0.00446974
264838_at	AHP5 (HISTIDINE-CONTAINING PHOSPHOTRANSFER FACTOR 5); histidine phosphotransfer kinase	AHP5	AT1G03430	1×g-PCB	µ×g-PCB	479.712	975.162	2.03281	1.02347	0.000801239
252670_at	ATJ3; protein binding	ATJ3	AT3G44110	1×g-PCB	µ×g-PCB	3838.49	7795.13	2.03078	1.02203	0.000321803
255499_at	transducin/WD40 domain-containing protein	AT4G02730	AT4G02730	1×g-PCB	µ×g-PCB	131.031	266.082	2.03067	1.02196	0.0136493
247999_at	UBC30 (ubiquitin-conjugating enzyme 30); ubiquitin-protein ligase	UBC30	AT5G56150	1×g-PCB	µ×g-PCB	1003.55	2036.27	2.02907	1.02082	0.0249472
253435_at	SHS1 (SODIUM HYPERSENSITIVE 1); binding / nucleotide transmembrane transporter/ transporter	SHS1	AT4G32400	1×g-PCB	µ×g-PCB	229.605	465.855	2.02894	1.02072	0.0177139
260033_at	ATNUDX1 (ARABIDOPSIS THALIANA NUDIX HYDROLASE 1); dihydroneopterin triphosphate pyrophosphohydrolase/ hydrolase	ATNUDX1	AT1G68760	1×g-PCB	µ×g-PCB	468.56	949.663	2.02677	1.01918	0.0437003
256022_at	AAP1 (AMINO ACID PERMEASE 1); amino acid transmembrane transporter/ neutral amino acid transmembrane transporter	AAP1	AT1G58360	1×g-PCB	µ×g-PCB	1204.68	2439.64	2.02515	1.01803	0.000555179
251852_at	hypothetical protein	AT3G54750	AT3G54750	1×g-PCB	µ×g-PCB	106.39	215.423	2.02485	1.01781	0.038268
259678_at	small ribosomal subunit protein S13	AT1G77750	AT1G77750	1×g-PCB	µ×g-PCB	119.731	241.767	2.01925	1.01382	0.0316907
246731_at	ACBP5 (ACYL-COA BINDING PROTEIN 5); acyl-CoA binding	ACBP5	AT5G27630	1×g-PCB	µ×g-PCB	49.2521	99.4439	2.01908	1.0137	0.0265613
258644_at	RNA recognition motif-containing protein	AT3G07810	AT3G07810	1×g-PCB	µ×g-PCB	280.65	566.176	2.01737	1.01248	0.000346348
252643_at	60S acidic ribosomal protein P2-4	AT3G44590	AT3G44590	1×g-PCB	µ×g-PCB	887.112	1786	2.01327	1.00954	0.00158611
253534_at	"CYP83B1 (CYTOCHROME P450 MONOOXYGENASE 83B1); oxidoreductase, acting on paired donors, with incorporation or reduction of molecular oxygen, NADH or NADPH as one donor, and incorporation of one atom of oxygen / oxygen binding"	CYP83B1	AT4G31500	1×g-PCB	µ×g-PCB	5784.1	11643.5	2.01302	1.00936	0.00268166
265886_at	DNA-binding protein phosphatase 1	DBP1	AT2G25620	1×g-PCB	µ×g-PCB	99.1114	199.449	2.01237	1.00889	0.0348273
247380_at	4-coumarate--CoA ligase-like 9	AT5G63380	AT5G63380	1×g-PCB	µ×g-PCB	194.931	392.263	2.01231	1.00885	0.0488299
246619_at	hypothetical protein	AT5G36290	AT5G36290	1×g-PCB	µ×g-PCB	1456.82	2930.02	2.01124	1.00809	0.00585357
251182_at	ATERDJ3B; heat shock protein binding / unfolded protein binding	ATERDJ3B	AT3G62600	1×g-PCB	µ×g-PCB	487.303	976.304	2.00348	1.00251	0.0125795
245293_at	heat shock protein 70	AT4G16660	AT4G16660	1×g-PCB	µ×g-PCB	383.294	767.574	2.00257	1.00186	0.00749962
264061_at	CKS2 (CDK-subunit 2); cyclin-dependent protein kinase/ cyclin-dependent protein kinase regulator	CKS2	AT2G27970	1×g-PCB	µ×g-PCB	184.249	368.96	2.00251	1.00181	0.0460515
262525_at	CYP72C1 (CYTOCHROME P450 72C1); electron carrier/ heme binding / iron ion binding / monooxygenase/ oxygen binding	CYP72C1	AT1G17060	1×g-PCB	µ×g-PCB	101.756	203.51	1.99997	0.99998	0.0353343
253709_at	PFK1 (PHOSPHOFRUCTOKINASE 1); 6-phosphofructokinase	PFK1	AT4G29220	1×g-PCB	µ×g-PCB	461.777	923.539	1.99997	0.999977	0.000300817
258650_at	protein kinase family protein	AT3G09830	AT3G09830	1×g-PCB	µ×g-PCB	2470.91	4940.17	1.99933	0.999516	0.00987663
253130_at	hypothetical protein	AT4G35510	AT4G35510	1×g-PCB	µ×g-PCB	259.365	518.448	1.99891	0.999215	0.0138284
259704_at	ribonuclease II/R family protein	AT1G77680	AT1G77680	1×g-PCB	µ×g-PCB	471.094	940.655	1.99674	0.997649	0.0150971
247983_at	PFK7 (PHOSPHOFRUCTOKINASE 7); 6-phosphofructokinase	PFK7	AT5G56630	1×g-PCB	µ×g-PCB	271.148	541.407	1.99672	0.997635	0.0122671
262931_at	Small nuclear ribonucleoprotein family protein	AT1G65700	AT1G65700	1×g-PCB	µ×g-PCB	220.743	440.685	1.99637	0.997376	0.00133171
250626_at	TUDOR-SN protein 1	Tudor1	AT5G07350	1×g-PCB	µ×g-PCB	715.904	1428.65	1.99559	0.996816	0.00214851
257949_at	"UGT71B1 (UDP-GLUCOSYL TRANSFERASE 71B1); UDP-glycosyltransferase/ quercetin 3-O-glucosyltransferase/ transferase, transferring glycosyl groups"	UGT71B1	AT3G21750	1×g-PCB	µ×g-PCB	291.203	579.836	1.99118	0.993621	0.0337896
257708_at	proteasome activating protein 200	PA200	AT3G13330	1×g-PCB	µ×g-PCB	411.972	820.27	1.99108	0.993553	0.0345968
258773_at	SAD1/UNC-84 domain-containing protein 2	SUN2	AT3G10730	1×g-PCB	µ×g-PCB	213.891	425.778	1.99063	0.993222	0.00261742
251783_at	RPL23AB (RIBOSOMAL PROTEIN L23AB); RNA binding / nucleotide binding / structural constituent of ribosome	RPL23AB	AT3G55280	1×g-PCB	µ×g-PCB	853.11	1697.92	1.99027	0.992968	0.000107985
265547_at	cytokinin riboside 5'-monophosphate phosphoribohydrolase LOG1	LOG1	AT2G28305	1×g-PCB	µ×g-PCB	546.017	1086.7	1.99022	0.99293	0.00313414
260777_at	mitochondrial CoA transporter	AT1G14560	AT1G14560	1×g-PCB	µ×g-PCB	261.474	520.381	1.99018	0.992902	0.0130848
255455_at	putative elongation factor Tu	AT4G02930	AT4G02930	1×g-PCB	µ×g-PCB	435.803	867.156	1.98979	0.992615	0.00176704
254656_at	hypothetical protein	AT4G18070	AT4G18070	1×g-PCB	µ×g-PCB	2793.14	5550.13	1.98706	0.990634	0.00101399
245155_at	hypothetical protein	AT5G12470	AT5G12470	1×g-PCB	µ×g-PCB	588.804	1169.94	1.98697	0.990574	0.00129344
264660_at	HEMA2; glutamyl-tRNA reductase	HEMA2	AT1G09940	1×g-PCB	µ×g-PCB	1327.41	2635.96	1.9858	0.989717	0.0218897
260439_at	hypothetical protein	AT1G68340	AT1G68340	1×g-PCB	µ×g-PCB	181.048	359.083	1.98336	0.987946	0.0146641
262647_at	O-fucosyltransferase family protein	AT1G14020	AT1G14020	1×g-PCB	µ×g-PCB	96.641	191.423	1.98077	0.986059	0.00492703
260325_at	"monodehydroascorbate reductase, putative"	MDAR6	AT1G63940	1×g-PCB	µ×g-PCB	291.139	576.644	1.98065	0.985971	0.0427764
246850_at	LON1 (LON PROTEASE 1); ATP binding / ATP-dependent peptidase/ serine-type peptidase	LON1	AT5G26860	1×g-PCB	µ×g-PCB	63.2194	125.174	1.98	0.9855	0.00151004
262846_at	putative endomembrane protein 70	AT1G14670	AT1G14670	1×g-PCB	µ×g-PCB	951.16	1880.87	1.97745	0.983643	0.0400207
258173_at	CERK1 (CHITIN ELICITOR RECEPTOR KINASE 1); kinase/ receptor signaling protein/ transmembrane receptor protein kinase	CERK1	AT3G21630	1×g-PCB	µ×g-PCB	749.566	1481.69	1.97673	0.983113	0.0132227
254468_at	putative UDP-arabinose 4-epimerase 3	AT4G20460	AT4G20460	1×g-PCB	µ×g-PCB	78.9112	155.862	1.97516	0.981971	0.0197369
254969_at	"TRAM, LAG1 and CLN8 (TLC) lipid-sensing domain containing protein"	AT4G10360	AT4G10360	1×g-PCB	µ×g-PCB	255.93	505.319	1.97444	0.981446	0.0224836
263223_at	coatomer subunit epsilon-1	AT1G30630	AT1G30630	1×g-PCB	µ×g-PCB	872.303	1721.34	1.97333	0.980631	0.0101182
261488_at	NAD(P)-linked oxidoreductase-like protein	AT1G14345	AT1G14345	1×g-PCB	µ×g-PCB	142.985	282.052	1.9726	0.9801	0.0141193
252046_at	hydroxyproline-rich glycoprotein family protein	AT3G52460	AT3G52460	1×g-PCB	µ×g-PCB	31.9773	63.0195	1.97075	0.978747	0.00442714
253137_at	protein kinase family protein	AT4G35500	AT4G35500	1×g-PCB	µ×g-PCB	293.316	578.044	1.97072	0.978723	0.00813798
253485_at	WRKY18; transcription factor	WRKY18	AT4G31800	1×g-PCB	µ×g-PCB	4057.75	7976.51	1.96575	0.975078	0.0115422
262289_at	hypothetical protein	AT1G70770	AT1G70770	1×g-PCB	µ×g-PCB	1115.59	2188.66	1.96189	0.972245	0.00527244
248875_at	protein RESISTANT TO P. SYRINGAE 6	RPS6	AT5G46470	1×g-PCB	µ×g-PCB	206.698	405.205	1.96037	0.971129	0.0126774
247604_at	COBL5 (COBRA-LIKE PROTEIN 5 PRECURSOR)	COBL5	AT5G60950	1×g-PCB	µ×g-PCB	235.096	460.096	1.95706	0.968687	0.0219294
260852_at	p24 subfamily delta 5	AT1G21900	AT1G21900	1×g-PCB	µ×g-PCB	505.028	986.81	1.95397	0.966408	0.00159336
245156_at	CPK7 (calmodulin-domain protein kinase 7); ATP binding / calcium ion binding / calmodulin-dependent protein kinase/ kinase/ protein kinase/ protein serine/threonine kinase	CPK7	AT5G12480	1×g-PCB	µ×g-PCB	270.4	527.73	1.95166	0.964705	0.000189518
Down-regulated genes
251935_at	fructokinase-like 1	FLN1	AT3G54090	1×g-PCB	µ×g-PCB	305.743	165.855	0.542466	-0.882396	0.00487406
247568_at	calmodulin-binding protein-like protein	AT5G61260	AT5G61260	1×g-PCB	µ×g-PCB	92.3462	48.9526	0.530099	-0.915667	0.0203672
251864_at	PMR6 (powdery mildew resistant 6); lyase/ pectate lyase	PMR6	AT3G54920	1×g-PCB	µ×g-PCB	288.76	151.75	0.525524	-0.928171	0.00153437
258368_at	Subtilase family protein	AT3G14240	AT3G14240	1×g-PCB	µ×g-PCB	752.455	394.472	0.524247	-0.931681	8.32167e-05
252410_at	NOA1 (NO ASSOCIATED 1); GTPase/ nitric-oxide synthase	NOA1	AT3G47450	1×g-PCB	µ×g-PCB	160.298	83.6405	0.521781	-0.938482	0.014139
250190_at	30S ribosomal protein S13	AT5G14320	AT5G14320	1×g-PCB	µ×g-PCB	1701.61	887.577	0.521611	-0.938954	0.000855855
262235_at	50S ribosomal protein L18/L5e family protein	AT1G48350	AT1G48350	1×g-PCB	µ×g-PCB	1158.15	603.983	0.521508	-0.939239	0.00621882
261435_at	GTP-binding protein Obg/CgtA	AT1G07615	AT1G07615	1×g-PCB	µ×g-PCB	116.945	60.9722	0.521375	-0.939606	0.00466022
262398_at	pfkB-type carbohydrate kinase-like protein	AT1G49350	AT1G49350	1×g-PCB	µ×g-PCB	194.004	101.09	0.521073	-0.940444	0.000582236
265887_at	HCS1 (HOLOCARBOXYLASE SYNTHASE); biotin-[acetyl-CoA-carboxylase] ligase/ catalytic	HCS1	AT2G25710	1×g-PCB	µ×g-PCB	434.885	225.343	0.518167	-0.948512	0.000803547
261078_at	RPL4; poly(U) binding / structural constituent of ribosome	RPL4	AT1G07320	1×g-PCB	µ×g-PCB	4042.85	2069.78	0.51196	-0.965898	0.00407275
253236_at	ARI1 (ARIADNE); protein binding / zinc ion binding	ARI1	AT4G34370	1×g-PCB	µ×g-PCB	565.768	289.44	0.511587	-0.966949	0.000194458
248058_at	C2 domain-containing protein	AT5G55530	AT5G55530	1×g-PCB	µ×g-PCB	1196.28	611.727	0.51136	-0.96759	0.00026547
251187_at	AtATG18a	AtATG18a	AT3G62770	1×g-PCB	µ×g-PCB	635.524	323.109	0.508414	-0.975924	0.00716249
267364_at	ELF4 (EARLY FLOWERING 4)	ELF4	AT2G40080	1×g-PCB	µ×g-PCB	300.322	152.552	0.507962	-0.977209	0.000242177
253125_at	chaperone protein dnaJ 11	AT4G36040	AT4G36040	1×g-PCB	µ×g-PCB	9927.46	5039.34	0.507616	-0.97819	0.0134485
246786_at	branched-chain-amino-acid aminotransferase-like protein 2	AT5G27410	AT5G27410	1×g-PCB	µ×g-PCB	116.411	58.9418	0.506324	-0.981866	0.0062916
264397_at	O-glycosyl hydrolases family 17 protein	AT1G11820	AT1G11820	1×g-PCB	µ×g-PCB	1515.23	765.723	0.505352	-0.98464	2.92591e-05
254197_at	"TRE1 (TREHALASE 1); alpha,alpha-trehalase/ trehalase"	TRE1	AT4G24040	1×g-PCB	µ×g-PCB	465.962	234.752	0.503801	-0.989075	0.00347488
266410_at	EMB2765 (EMBRYO DEFECTIVE 2765)	EMB2765	AT2G38770	1×g-PCB	µ×g-PCB	515.423	259.182	0.502854	-0.991789	0.00516741
261498_at	HSL1 (HAESA-Like 1); ATP binding / kinase/ protein serine/threonine kinase	HSL1	AT1G28440	1×g-PCB	µ×g-PCB	667.347	335.359	0.502526	-0.99273	0.00238516
248338_at	HCF106; proton motive force dependent protein transmembrane transporter	HCF106	AT5G52440	1×g-PCB	µ×g-PCB	888.582	446.292	0.502252	-0.993516	0.00116137
257971_at	GC6 (golgin candidate 6); binding / protein transporter	GC6	AT3G27530	1×g-PCB	µ×g-PCB	451.697	226.85	0.502217	-0.993618	0.00273571
250865_at	hypothetical protein	AT5G03900	AT5G03900	1×g-PCB	µ×g-PCB	529.662	266.001	0.502208	-0.993643	0.000336242
256041_at	non-specific phospholipase C1	NPC1	AT1G07230	1×g-PCB	µ×g-PCB	709.61	355.977	0.501651	-0.995244	0.000763055
246237_at	Methylthiotransferase	AT4G36390	AT4G36390	1×g-PCB	µ×g-PCB	772.61	387.537	0.501595	-0.995405	0.000980952
258660_at	D111/G-patch domain-containing protein	AT3G09850	AT3G09850	1×g-PCB	µ×g-PCB	2152.95	1078.7	0.501035	-0.997016	0.00906242
250720_at	hypothetical protein	AT5G06180	AT5G06180	1×g-PCB	µ×g-PCB	104.965	52.5391	0.500541	-0.998439	0.0213541
267062_at	hydroxyproline-rich glycoprotein family protein	AT2G32600	AT2G32600	1×g-PCB	µ×g-PCB	955.918	478.207	0.500259	-0.999254	0.000886983
246324_at	SR45; RNA binding / protein binding	SR45	AT1G16610	1×g-PCB	µ×g-PCB	671.979	335.861	0.499808	-1.00055	0.0022546
245730_at	hypothetical protein	AT1G73470	AT1G73470	1×g-PCB	µ×g-PCB	824.809	412.023	0.499537	-1.00134	0.000439253
259973_at	superkiller protein 3-like protein	AT1G76630	AT1G76630	1×g-PCB	µ×g-PCB	222.415	111.085	0.49945	-1.00159	0.00122873
259717_at	CPSF73-I (CLEAVAGE AND POLYADENYLATION SPECIFICITY FACTOR 73-I); protein binding	CPSF73-I	AT1G61010	1×g-PCB	µ×g-PCB	552.202	275.297	0.498543	-1.00421	0.00207022
245803_at	RD21 (responsive to dehydration 21); cysteine-type endopeptidase/ cysteine-type peptidase	RD21	AT1G47128	1×g-PCB	µ×g-PCB	6916.99	3447.49	0.498409	-1.0046	0.00141976
264239_at	Fcf2 pre-rRNA processing protein	AT1G54770	AT1G54770	1×g-PCB	µ×g-PCB	585.752	291.763	0.4981	-1.00549	0.00520163
259171_at	SWIB/MDM2 domain-containing protein	AT3G03590	AT3G03590	1×g-PCB	µ×g-PCB	141.011	70.236	0.498088	-1.00553	0.00493793
248899_at	peptidase S41 family protein	AT5G46390	AT5G46390	1×g-PCB	µ×g-PCB	243.478	121.091	0.497338	-1.0077	6.76101e-05
255044_at	CST complex subunit CTC1	CTC1	AT4G09680	1×g-PCB	µ×g-PCB	321.507	159.878	0.497275	-1.00788	0.00452313
267027_at	MATE efflux family protein	AT2G38330	AT2G38330	1×g-PCB	µ×g-PCB	370.497	184.148	0.497028	-1.0086	0.0067869
251320_at	PANB2; 3-methyl-2-oxobutanoate hydroxymethyltransferase	PANB2	AT3G61530	1×g-PCB	µ×g-PCB	170.324	84.6302	0.496876	-1.00904	0.020416
250885_at	"ATATH12; ATPase, coupled to transmembrane movement of substances / transporter"	ATH12	AT5G03910	1×g-PCB	µ×g-PCB	355.812	176.632	0.496419	-1.01037	0.000723854
248508_at	ELO3 (ELONGATA 3); histone acetyltransferase	ELO3	AT5G50320	1×g-PCB	µ×g-PCB	2041.01	1013.09	0.496367	-1.01052	0.0023819
250879_at	putative methyltransferase PMT7	AT5G04060	AT5G04060	1×g-PCB	µ×g-PCB	148.029	73.3677	0.495632	-1.01266	0.0350782
262908_at	"AT-E1 ALPHA; oxidoreductase, acting on the aldehyde or oxo group of donors, disulfide as acceptor / pyruvate dehydrogenase (acetyl-transferring)"	AT-E1 ALPHA	AT1G59900	1×g-PCB	µ×g-PCB	6359.44	3151.82	0.495613	-1.01272	0.00145608
252032_at	RNA recognition motif-containing protein	AT3G52150	AT3G52150	1×g-PCB	µ×g-PCB	808.283	400.14	0.495049	-1.01436	0.00851522
255510_at	SWN (SWINGER); transcription factor	SWN	AT4G02020	1×g-PCB	µ×g-PCB	618.154	305.961	0.494959	-1.01462	0.00640056
252027_at	VSR1 (VACUOLAR SORTING RECEPTOR HOMOLOG 1); amino-terminal vacuolar sorting propeptide binding	VSR1	AT3G52850	1×g-PCB	µ×g-PCB	2080.11	1028.47	0.494429	-1.01616	0.00302339
267018_at	SVR1 (SUPPRESSOR OF VARIEGATION 1); RNA binding / pseudouridine synthase	SVR1	AT2G39140	1×g-PCB	µ×g-PCB	183.564	90.751	0.494382	-1.0163	0.00249551
256828_at	hypothetical protein /// conserved peptide upstream open reading frame 59	AT3G22970 /// CPuORF59	AT3G22968 /// AT3G22970	1×g-PCB	µ×g-PCB	517.398	255.719	0.49424	-1.01672	0.00157032
258136_at	RSY3 (RASPBERRY 3)	RSY3	AT3G24560	1×g-PCB	µ×g-PCB	239.464	118.319	0.494099	-1.01713	0.00852483
245359_at	IBR10 (INDOLE-3-BUTYRIC ACID RESPONSE 10); catalytic/ dodecenoyl-CoA delta-isomerase	IBR10	AT4G14430	1×g-PCB	µ×g-PCB	1382.68	683.1	0.494041	-1.0173	0.00276714
247201_at	50S ribosomal protein L29	AT5G65220	AT5G65220	1×g-PCB	µ×g-PCB	6053.08	2987.01	0.49347	-1.01897	0.00211771
267067_at	WW domain-containing protein	AT2G41020	---	1×g-PCB	µ×g-PCB	176.453	87.0668	0.493428	-1.01909	0.00158234
252945_at	RING/U-box domain-containing protein	AT4G39140	AT4G39140	1×g-PCB	µ×g-PCB	1164.46	573.565	0.492557	-1.02164	0.00493892
261686_at	hypothetical protein	AT1G47310	AT1G47310	1×g-PCB	µ×g-PCB	630.216	310.328	0.492416	-1.02205	0.00252195
251100_at	putative aldose reductase	AT5G01670	AT5G01670	1×g-PCB	µ×g-PCB	586.108	288.563	0.492337	-1.02228	0.000993344
248079_at	hypothetical protein	AT5G55790	AT5G55790	1×g-PCB	µ×g-PCB	796.822	392.014	0.491972	-1.02335	0.00143528
267318_at	FAH1 (FATTY ACID HYDROXYLASE 1); catalytic/ fatty acid alpha-hydroxylase	FAH1	AT2G34770	1×g-PCB	µ×g-PCB	2371.55	1165.85	0.4916	-1.02444	0.00828823
249294_at	hypothetical protein	AT5G41270	AT5G41270	1×g-PCB	µ×g-PCB	233.871	114.814	0.490926	-1.02642	0.0117741
264935_at	LisH and RanBPM domain-containing protein	AT1G61150	AT1G61150	1×g-PCB	µ×g-PCB	1151.49	565.238	0.490874	-1.02658	0.00303051
266099_at	CAC3; acetyl-CoA carboxylase	CAC3	AT2G38040	1×g-PCB	µ×g-PCB	2282.26	1119.05	0.490326	-1.02819	0.00398806
248798_at	50S ribosomal protein L19-2	AT5G47190	AT5G47190	1×g-PCB	µ×g-PCB	752.932	369.122	0.490246	-1.02842	0.00821599
249196_at	"Abscisic acid-responsive (TB2/DP1, HVA22) family protein"	AT5G42560	AT5G42560	1×g-PCB	µ×g-PCB	670.524	327.626	0.488612	-1.03324	0.00154749
251325_s_at	LHCA2; chlorophyll binding	LHCA2	AT3G61470 /// AT5G28450	1×g-PCB	µ×g-PCB	20783.3	10153.4	0.488539	-1.03345	0.00126417
257518_at	hypothetical protein	AT3G03880	AT3G03880	1×g-PCB	µ×g-PCB	334.741	163.497	0.488428	-1.03378	0.00513484
249228_at	ASK2 (ARABIDOPSIS SKP1-LIKE 2); protein binding / ubiquitin-protein ligase	ASK2	AT5G42190	1×g-PCB	µ×g-PCB	5608.37	2737.42	0.488096	-1.03476	0.00448484
265953_at	CPuORF52 (Conserved peptide upstream open reading frame 52)	CPuORF52	AT2G37478 /// AT2G37480	1×g-PCB	µ×g-PCB	2383.37	1163.14	0.488025	-1.03497	0.00438324
264955_at	SKP1-interacting partner 15	AT1G76920	AT1G76920	1×g-PCB	µ×g-PCB	1854.06	903.418	0.487264	-1.03722	0.000331312
262570_at	protein-protein interaction regulator family protein	AT1G15200	AT1G15200	1×g-PCB	µ×g-PCB	1088.08	530.06	0.487153	-1.03755	0.00653378
251829_at	RabGAP/TBC domain-containing protein	AT3G55020	AT3G55020	1×g-PCB	µ×g-PCB	355.313	172.804	0.486344	-1.03995	0.0072867
248900_at	PRP39-2	PRP39-2	AT5G46400	1×g-PCB	µ×g-PCB	126.259	61.3885	0.486212	-1.04034	0.0169333
246421_at	Target of Myb protein 1	AT5G16880	AT5G16880	1×g-PCB	µ×g-PCB	3949.73	1918.8	0.485806	-1.04155	0.00110984
257897_at	ATHAL3A; FMN binding / phosphopantothenoylcysteine decarboxylase	HAL3A	AT3G18030	1×g-PCB	µ×g-PCB	609.671	296.151	0.485756	-1.0417	0.00358219
265779_at	SH3 domain-containing protein	AT2G07360	AT2G07360	1×g-PCB	µ×g-PCB	216.814	105.292	0.485634	-1.04206	0.0012533
255656_at	transcription factor jumonji (jmjC) domain-containing protein	AT4G00990	AT4G00990	1×g-PCB	µ×g-PCB	255.504	124.073	0.485603	-1.04215	0.0053524
254760_at	hypothetical protein	AT4G13200	AT4G13200	1×g-PCB	µ×g-PCB	630.615	306.149	0.485476	-1.04253	0.00322762
259959_at	CYP59 (CYCLOPHILIN 59); RNA binding / nucleic acid binding / peptidyl-prolyl cis-trans isomerase	CYP59	AT1G53720	1×g-PCB	µ×g-PCB	158.249	76.809	0.485367	-1.04285	0.00874551
247388_s_at	"NF-YC1 (NUCLEAR FACTOR Y, SUBUNIT C1); DNA binding / transcription activator/ transcription factor"	NF-YC1	AT3G48590 /// AT5G63470	1×g-PCB	µ×g-PCB	111.71	54.2172	0.485338	-1.04294	0.0092468
262029_at	50S ribosomal protein L21	AT1G35680	AT1G35680	1×g-PCB	µ×g-PCB	1821.95	883.805	0.485088	-1.04368	0.0267779
262336_at	TOM7-2 (TRANSLOCASE OF OUTER MEMBRANE 7 KDA SUBUNIT 2); P-P-bond-hydrolysis-driven protein transmembrane transporter	TOM7-2	AT1G64220	1×g-PCB	µ×g-PCB	118.064	57.2631	0.485019	-1.04389	0.012526
248505_at	hypothetical protein	AT5G50360	AT5G50360	1×g-PCB	µ×g-PCB	130.586	63.3354	0.485011	-1.04391	0.0237671
247449_at	chloride conductance regulatory protein ICln	AT5G62290	AT5G62290	1×g-PCB	µ×g-PCB	1301.53	630.97	0.484792	-1.04456	0.0120569
260815_at	TIC110 (TRANSLOCON AT THE INNER ENVELOPE MEMBRANE OF CHLOROPLASTS 110)	TIC110	AT1G06950	1×g-PCB	µ×g-PCB	1361.39	659.718	0.48459	-1.04516	0.00239492
247335_at	DEAD-box ATP-dependent RNA helicase 31	AT5G63630	AT5G63630	1×g-PCB	µ×g-PCB	160.017	77.5412	0.484581	-1.04519	0.00072572
254849_at	YTH family protein	AT4G11970	AT4G11970	1×g-PCB	µ×g-PCB	192.332	93.1118	0.48412	-1.04656	0.00366918
261102_at	protein cornichon-3	AT1G62880	AT1G62880	1×g-PCB	µ×g-PCB	317.096	153.449	0.48392	-1.04716	0.0144957
252950_at	1-phosphatidylinositol phosphodiesterase-related protein	AT4G38690	AT4G38690	1×g-PCB	µ×g-PCB	1376.45	665.941	0.48381	-1.04749	0.0144033
252166_at	SNRK2.2 (SNF1-RELATED PROTEIN KINASE 2.2); kinase/ protein kinase	SNRK2.2	AT3G50500	1×g-PCB	µ×g-PCB	5609.57	2713.76	0.483773	-1.0476	0.00387466
253574_at	putative membrane lipoprotein	AT4G31030	AT4G31030	1×g-PCB	µ×g-PCB	201.522	97.4851	0.483745	-1.04768	0.00439212
247508_at	ARF2 (AUXIN RESPONSE FACTOR 2); protein binding / transcription factor	ARF2	AT5G62000	1×g-PCB	µ×g-PCB	1279.45	618.846	0.48368	-1.04788	0.0115788
248401_at	HCF208 (HIGH CHLOROPHYLL FLUORESCENCE 208)	HCF208	AT5G52110	1×g-PCB	µ×g-PCB	136.421	65.9645	0.483537	-1.0483	0.0101751
252576_s_at	HSP93-III; ATP binding / ATPase/ DNA binding / nuclease/ nucleoside-triphosphatase/ nucleotide binding / protein binding	HSP93-III	AT3G45450 /// AT3G48870	1×g-PCB	µ×g-PCB	131.07	63.349	0.483323	-1.04894	0.0277987
256697_at	AtOCT4 (Arabidopsis thaliana ORGANIC CATION/CARNITINE TRANSPORTER4); carbohydrate transmembrane transporter/ sugar:hydrogen symporter	AtOCT4	AT3G20660	1×g-PCB	µ×g-PCB	244.923	118.363	0.483265	-1.04911	0.0141522
246031_at	LA RNA-binding protein	AT5G21160	AT5G21160	1×g-PCB	µ×g-PCB	1296.14	626.314	0.483216	-1.04926	0.00533393
262238_at	hypothetical protein	AT1G48300	AT1G48300	1×g-PCB	µ×g-PCB	2358.6	1139.39	0.48308	-1.04967	0.000635746
258126_at	alcohol dehydrogenase transcription factor myb/SANT-like protein	AT3G24490	AT3G24490	1×g-PCB	µ×g-PCB	774.66	374.202	0.483054	-1.04974	0.00606296
256482_at	FEI1 (FEI 1); ATP binding / kinase/ protein serine/threonine kinase	FEI1	AT1G31420	1×g-PCB	µ×g-PCB	2095.15	1011.95	0.482996	-1.04992	0.00948104
246155_at	plant Tudor-like RNA-binding protein	AT5G20030	AT5G20030	1×g-PCB	µ×g-PCB	103.218	49.8282	0.482747	-1.05066	0.0287749
249318_at	AtUK/UPRT1 (Uridine kinase/Uracil phosphoribosyltransferase 1); ATP binding / kinase/ uracil phosphoribosyltransferase/ uridine kinase	AtUK/UPRT1	AT5G40870	1×g-PCB	µ×g-PCB	263.312	127.039	0.482467	-1.0515	0.000416578
257974_at	leucine-rich repeat-containing protein	AT3G20820	AT3G20820	1×g-PCB	µ×g-PCB	2579.24	1243.02	0.481934	-1.05309	0.0121909
258499_at	RAD23-3 (PUTATIVE DNA REPAIR PROTEIN RAD23-3)	RAD23-3	AT3G02540	1×g-PCB	µ×g-PCB	1320.6	635.995	0.481597	-1.0541	0.00593704
258800_at	hypothetical protein	AT3G04550	AT3G04550	1×g-PCB	µ×g-PCB	279.986	134.811	0.48149	-1.05442	0.000922727
259916_at	hydroxyproline-rich glycoprotein family protein	AT1G72600	AT1G72600	1×g-PCB	µ×g-PCB	74.7183	35.9723	0.481439	-1.05457	0.0108391
255475_at	AAA-type ATPase family protein	AT4G02480	AT4G02480	1×g-PCB	µ×g-PCB	381.121	183.349	0.481078	-1.05566	0.00752729
267509_at	AGL20 (AGAMOUS-LIKE 20); transcription factor	AGL20	AT2G45660	1×g-PCB	µ×g-PCB	359.525	172.857	0.480792	-1.05651	0.0024948
264748_at	EMB25 (EMBRYO DEFECTIVE 25); ATP-dependent helicase/ RNA helicase	EMB25	AT1G70070	1×g-PCB	µ×g-PCB	207.389	99.7051	0.480763	-1.0566	0.000554444
259738_at	hypothetical protein	AT1G64355	AT1G64355	1×g-PCB	µ×g-PCB	499.227	239.74	0.480222	-1.05823	0.00969793
249146_at	COP1-interacting protein-like protein	AT5G43310	AT5G43310	1×g-PCB	µ×g-PCB	296.183	142.128	0.479864	-1.0593	0.000312419
249758_at	hypothetical protein	AT5G24350	AT5G24350	1×g-PCB	µ×g-PCB	455.842	218.742	0.479864	-1.0593	0.00732985
248722_at	PFK2 (PHOSPHOFRUCTOKINASE 2); 6-phosphofructokinase	PFK2	AT5G47810	1×g-PCB	µ×g-PCB	343.803	164.873	0.479556	-1.06023	0.0138033
261954_at	30S ribosomal protein S6 alpha	AT1G64510	AT1G64510	1×g-PCB	µ×g-PCB	2612.27	1251.53	0.479096	-1.06161	0.0125874
260512_at	RNA recognition motif-containing protein	AT1G51520	AT1G51520	1×g-PCB	µ×g-PCB	54.2532	25.9847	0.478953	-1.06204	0.00682686
252559_at	RNA recognition motif-containing protein	AT3G46020	AT3G46020	1×g-PCB	µ×g-PCB	91.6638	43.8825	0.478733	-1.06271	0.0316452
253418_at	ENTH/VHS/GAT family protein	AT4G32760	AT4G32760	1×g-PCB	µ×g-PCB	2953.64	1413.4	0.478528	-1.06332	0.00345933
259397_at	tetratricopeptide repeat (TPR)-containing protein	AT1G17680	AT1G17680	1×g-PCB	µ×g-PCB	627.24	300.103	0.478451	-1.06356	0.00630761
253285_at	"KCS16 (3-KETOACYL-COA SYNTHASE 16); acyltransferase/ catalytic/ transferase, transferring acyl groups other than amino-acyl groups"	KCS16	AT4G34250	1×g-PCB	µ×g-PCB	176.073	84.2152	0.478298	-1.06402	0.00872814
250040_at	pentatricopeptide repeat-containing protein	AT5G18390	AT5G18390	1×g-PCB	µ×g-PCB	200.373	95.8226	0.478221	-1.06425	0.00532415
246072_at	PI (PISTILLATA); DNA binding / transcription factor	PI	AT5G20240	1×g-PCB	µ×g-PCB	169.284	80.9021	0.477907	-1.0652	0.0459492
260968_at	Pentapeptide repeat-containing protein	AT1G12250	AT1G12250	1×g-PCB	µ×g-PCB	703.043	335.898	0.477778	-1.06559	0.00938259
260799_at	"AtUGT85A4 (UDP-glucosyl transferase 85A4); UDP-glycosyltransferase/ glucuronosyltransferase/ transferase, transferring hexosyl groups"	AtUGT85A4	AT1G78270	1×g-PCB	µ×g-PCB	172.216	82.2789	0.477767	-1.06562	0.00237414
255549_at	GPAT3 (GLYCEROL-3-PHOSPHATE ACYLTRANSFERASE 3); acyltransferase	GPAT3	AT4G01950	1×g-PCB	µ×g-PCB	4433.56	2118.17	0.477759	-1.06565	0.00186153
258698_at	alpha/beta-Hydrolases superfamily protein	AT3G09690	AT3G09690	1×g-PCB	µ×g-PCB	258.299	123.393	0.477716	-1.06578	0.00699325
248669_at	pentatricopeptide repeat-containing protein	AT5G48730	AT5G48730	1×g-PCB	µ×g-PCB	231.454	110.499	0.477411	-1.0667	0.0181705
250603_at	calmodulin-binding protein-like protein	AT5G07820	AT5G07820	1×g-PCB	µ×g-PCB	125.218	59.7679	0.477311	-1.067	0.012669
266534_at	"splicing factor, CC1-like protein"	AT2G16940	AT2G16940	1×g-PCB	µ×g-PCB	1517.25	723.668	0.476959	-1.06806	0.00021205
257214_at	hypothetical protein	AT3G15040	AT3G15040	1×g-PCB	µ×g-PCB	1171.4	558.6	0.476864	-1.06835	0.012945
266889_at	hypothetical protein	AT2G44640	AT2G44640	1×g-PCB	µ×g-PCB	350.312	166.955	0.476589	-1.06918	0.000854853
263957_at	TPX2 (targeting protein for Xklp2)-like protein	AT2G35880	AT2G35880	1×g-PCB	µ×g-PCB	2076.72	989.626	0.476534	-1.06935	0.00691541
249845_at	hypothetical protein	AT5G23610	AT5G23610	1×g-PCB	µ×g-PCB	1198.91	571.281	0.476501	-1.06945	0.000230129
252325_at	CSR1 (CHLORSULFURON/IMIDAZOLINONE RESISTANT 1); acetolactate synthase/ pyruvate decarboxylase	CSR1	AT3G48560	1×g-PCB	µ×g-PCB	8918.33	4248.58	0.476387	-1.0698	0.00705353
257712_at	hypothetical protein	AT3G27420	AT3G27420	1×g-PCB	µ×g-PCB	397.062	189.118	0.476293	-1.07008	0.000373261
256675_at	DNA binding protein	AT3G52170	AT3G52170	1×g-PCB	µ×g-PCB	100.372	47.7048	0.475281	-1.07315	0.0114223
256341_at	deoxyribonucleoside kinase	AT1G72040	AT1G72040	1×g-PCB	µ×g-PCB	721.082	342.698	0.475255	-1.07323	0.00991232
258963_at	Myotubularin 1	AT3G10550	AT3G10550	1×g-PCB	µ×g-PCB	546.217	259.551	0.47518	-1.07345	0.0020681
260787_at	GTE4 (GLOBAL TRANSCRIPTION FACTOR GROUP E 4); DNA binding	GTE4	AT1G06230	1×g-PCB	µ×g-PCB	1162.54	552.391	0.475157	-1.07352	0.000459565
264551_at	carbohydrate-binding X8 domain-containing protein	AT1G09460	AT1G09460	1×g-PCB	µ×g-PCB	210.168	99.8256	0.47498	-1.07406	0.00955843
259051_at	Rossmann-fold NAD(P)-binding domain-containing protein	AT3G03330	AT3G03330	1×g-PCB	µ×g-PCB	1962.94	931.277	0.47443	-1.07573	0.000372105
247398_at	"RNA polymerase II, Rpb4, core protein"	AT5G62950	AT5G62950	1×g-PCB	µ×g-PCB	796.316	377.78	0.47441	-1.07579	0.00956357
247082_at	ATGRIP; protein binding	ATGRIP	AT5G66030	1×g-PCB	µ×g-PCB	1282.63	608.258	0.474228	-1.07635	0.00475981
251853_at	U-box domain-containing protein 3	AT3G54790	AT3G54790	1×g-PCB	µ×g-PCB	446.598	211.755	0.474151	-1.07658	0.00428883
266575_at	translation initiation factor IF-3	AT2G24060	AT2G24060	1×g-PCB	µ×g-PCB	415.443	196.95	0.474071	-1.07682	0.00360972
258061_at	hypothetical protein	AT3G25910	AT3G25910	1×g-PCB	µ×g-PCB	3720.31	1763.66	0.474061	-1.07685	0.0056207
247176_at	ACX2 (ACYL-COA OXIDASE 2); acyl-CoA oxidase	ACX2	AT5G65110	1×g-PCB	µ×g-PCB	1901.3	901.293	0.47404	-1.07692	0.00805995
248120_at	hypothetical protein	AT5G54540	AT5G54540	1×g-PCB	µ×g-PCB	3351.24	1588.43	0.473982	-1.07709	0.000430957
264858_at	SNL3 (SIN3-LIKE 3); transcription repressor	SNL3	AT1G24190	1×g-PCB	µ×g-PCB	512.609	242.915	0.473879	-1.07741	0.00193318
255047_at	oxidoreductase family protein	AT4G09670	AT4G09670	1×g-PCB	µ×g-PCB	1314.34	622.749	0.473812	-1.07761	0.00345855
255540_at	protein translocase subunit secA	AGY1	AT4G01800	1×g-PCB	µ×g-PCB	838.623	397.262	0.473707	-1.07793	0.00624118
247921_at	zinc finger (B-box type) family protein	COL5	AT5G57660	1×g-PCB	µ×g-PCB	10747.6	5089.37	0.473534	-1.07846	0.00642845
257855_at	myb-like HTH transcriptional regulator family protein	AT3G13040	AT3G13040	1×g-PCB	µ×g-PCB	1705.37	807.481	0.473493	-1.07858	0.00988923
250022_at	Rossmann-fold NAD(P)-binding domain-containing protein	AT5G18210	AT5G18210	1×g-PCB	µ×g-PCB	177.82	84.1672	0.473328	-1.07909	0.0132589
256209_at	ETFALPHA (electron transfer flavoprotein alpha); FAD binding / electron carrier	ETFALPHA	AT1G50940	1×g-PCB	µ×g-PCB	440.203	208.283	0.473151	-1.07963	0.00436224
255469_at	F-box/kelch-repeat protein OR23	AT4G03030	AT4G03030	1×g-PCB	µ×g-PCB	1630.46	770.979	0.47286	-1.08051	0.0119731
251862_at	PUB14; ubiquitin-protein ligase	PUB14	AT3G54850	1×g-PCB	µ×g-PCB	1053.57	498	0.472679	-1.08107	0.0034895
251558_at	OTU-like cysteine protease domain-containing protein	AT3G57810	AT3G57810	1×g-PCB	µ×g-PCB	622.978	294.414	0.47259	-1.08134	0.012454
246449_at	protein kinase family protein	AT5G16810	AT5G16810	1×g-PCB	µ×g-PCB	220.511	104.21	0.472583	-1.08136	0.0112603
253022_at	hypothetical protein	AT4G38060	AT4G38060	1×g-PCB	µ×g-PCB	1736.55	820.256	0.472348	-1.08208	0.0105557
264486_at	putative transcription factor SKIP	SKIP	AT1G77180	1×g-PCB	µ×g-PCB	3304.91	1560.81	0.472269	-1.08232	0.000959289
260837_at	"fructose-1,6-bisphosphatase"	AT1G43670	AT1G43670	1×g-PCB	µ×g-PCB	580.747	273.901	0.471637	-1.08425	0.0083827
266923_at	hypothetical protein	AT2G45980	AT2G45980	1×g-PCB	µ×g-PCB	4461.81	2104.23	0.47161	-1.08433	0.00113159
267602_at	hypothetical protein	AT2G32970	AT2G32970	1×g-PCB	µ×g-PCB	555.635	261.99	0.471516	-1.08462	0.000454015
260026_at	RPL18AA (60S RIBOSOMAL PROTEIN L18A-1)	RPL18AA	AT1G29970	1×g-PCB	µ×g-PCB	5087.12	2395.82	0.470958	-1.08633	0.0073203
259733_at	aspartyl protease	AT1G77480	AT1G77480	1×g-PCB	µ×g-PCB	422.663	198.981	0.470781	-1.08687	0.00112293
262852_at	ARID/BRIGHT DNA-binding domain-containing protein	AT1G20910	AT1G20910	1×g-PCB	µ×g-PCB	357.412	168.203	0.470614	-1.08738	0.00382476
250790_at	nucleoprotein-like protein	AT5G05640	AT5G05640	1×g-PCB	µ×g-PCB	410.073	192.941	0.470503	-1.08772	0.0146065
257199_at	Tic22-like family protein	AT3G23710	AT3G23710	1×g-PCB	µ×g-PCB	548.955	258.28	0.470494	-1.08775	0.0026215
256542_at	PMI1 (PLASTID MOVEMENT IMPAIRED1)	PMI1	AT1G42550	1×g-PCB	µ×g-PCB	1439.1	676.865	0.470339	-1.08823	0.0115415
264905_at	MLO7 (MILDEW RESISTANCE LOCUS O 7); calmodulin binding	MLO7	AT2G17430	1×g-PCB	µ×g-PCB	204.822	96.1952	0.469653	-1.09033	0.0158217
266589_at	myosin heavy chain-like protein	AT2G46250	AT2G46250	1×g-PCB	µ×g-PCB	210.032	98.6296	0.469594	-1.09051	0.00905039
265934_at	EER5 (ENHANCED ETHYLENE RESPONSE 5)	EER5	AT2G19560	1×g-PCB	µ×g-PCB	380.485	178.482	0.469092	-1.09206	0.011718
248250_at	CNGC1 (CYCLIC NUCLEOTIDE GATED CHANNEL 1); calmodulin binding / cation channel/ cyclic nucleotide binding / intracellular cyclic nucleotide activated cation channel/ inward rectifier potassium channel	CNGC1	AT5G53130	1×g-PCB	µ×g-PCB	1915.86	898.588	0.469027	-1.09226	0.00424782
259521_at	CLP2 (CLP PROTEASE PROTEOLYTIC SUBUNIT 2); serine-type endopeptidase	CLP2	AT1G12410	1×g-PCB	µ×g-PCB	3565.16	1670.44	0.468545	-1.09374	6.6954e-05
251610_at	hypothetical protein	AT3G57930	AT3G57930	1×g-PCB	µ×g-PCB	907.404	425.117	0.468498	-1.09388	0.0342383
264285_at	ATG8C (autophagy 8c); microtubule binding	ATG8C	AT1G62040	1×g-PCB	µ×g-PCB	1398.96	654.696	0.467988	-1.09546	0.00564622
262592_at	hypothetical protein	AT1G15400	AT1G15400	1×g-PCB	µ×g-PCB	4144.97	1939.04	0.467806	-1.09602	0.000729031
246037_at	regulator of chromosome condensation-like protein with FYVE zinc finger domain	AT5G19420	AT5G19420	1×g-PCB	µ×g-PCB	298.316	139.516	0.467679	-1.09641	0.00333601
264265_at	hypothetical protein	AT1G09280	AT1G09280	1×g-PCB	µ×g-PCB	694.1	324.319	0.467251	-1.09773	0.00752002
265247_at	50S ribosomal protein L3-1	AT2G43030	AT2G43030	1×g-PCB	µ×g-PCB	6572.07	3068.04	0.46683	-1.09903	0.00265998
265344_at	hypothetical protein	AT2G22660	AT2G22660	1×g-PCB	µ×g-PCB	4162.31	1942.19	0.466614	-1.0997	0.00304925
245255_at	COP9 (CONSTITUTIVE PHOTOMORPHOGENIC 9); metalloendopeptidase/ protein binding	COP9	AT4G14110	1×g-PCB	µ×g-PCB	1322.2	616.685	0.466409	-1.10033	0.00713144
255226_at	DDB1A (DAMAGED DNA BINDING PROTEIN 1A); DNA binding / protein binding	DDB1A	AT4G05420	1×g-PCB	µ×g-PCB	1959	913.611	0.466365	-1.10047	0.0059827
252617_at	"SETH2; transferase, transferring glycosyl groups"	SETH2	AT3G45100	1×g-PCB	µ×g-PCB	462.641	215.752	0.466348	-1.10052	0.00660335
247187_at	hypothetical protein	AT5G65490	AT5G65490	1×g-PCB	µ×g-PCB	462.203	215.41	0.46605	-1.10144	0.0123731
245645_at	ATMAP70-2 (microtubule-associated proteins 70-2); microtubule binding	ATMAP70-2	AT1G24764	1×g-PCB	µ×g-PCB	255.675	119.107	0.465852	-1.10205	0.0121948
262848_at	BPC2 (BASIC PENTACYSTEINE 2); DNA binding / transcription factor	BPC2	AT1G14685	1×g-PCB	µ×g-PCB	700.513	326.234	0.465707	-1.1025	0.0264599
261638_at	hypothetical protein	AT1G49975	AT1G49975	1×g-PCB	µ×g-PCB	180.324	83.9213	0.465391	-1.10349	0.00323692
259591_at	hypothetical protein	AT1G28150	AT1G28150	1×g-PCB	µ×g-PCB	668.711	311.088	0.465205	-1.10406	0.000164725
266629_at	---	---	AT2G35590	1×g-PCB	µ×g-PCB	72.0312	33.5012	0.465092	-1.10441	0.0285847
252480_at	MBD5 (METHYL-CPG-BINDING DOMAIN PROTEIN 5); DNA binding / methyl-CpG binding	MBD5	AT3G46580	1×g-PCB	µ×g-PCB	122.428	56.936	0.465059	-1.10452	0.000850067
253716_at	F-box/LRR-repeat protein	AT4G29420	AT4G29420	1×g-PCB	µ×g-PCB	381.709	177.509	0.465038	-1.10458	0.00250135
258214_at	"atToc64-III (Arabidopsis thaliana translocon at the outer membrane of chloroplasts 64-III); binding / carbon-nitrogen ligase, with glutamine as amido-N-donor"	atToc64-III	AT3G17970	1×g-PCB	µ×g-PCB	284.4	132.222	0.464917	-1.10496	0.0078387
266734_at	hypothetical protein	AT2G46900	AT2G46900	1×g-PCB	µ×g-PCB	783.876	364.423	0.464898	-1.10501	0.000268561
246653_at	putative clathrin assembly protein	AT5G35200	AT5G35200	1×g-PCB	µ×g-PCB	2063.6	959.075	0.464758	-1.10545	0.0102535
264177_at	pentatricopeptide repeat-containing protein	AT1G02150	AT1G02150	1×g-PCB	µ×g-PCB	1000.39	464.522	0.464342	-1.10674	0.00403919
244973_at	photosystem II protein T	psbT	ATCG00690	1×g-PCB	µ×g-PCB	801.381	372.001	0.464199	-1.10718	0.021577
260915_at	alpha/beta-Hydrolases superfamily protein	AT1G02660	AT1G02660	1×g-PCB	µ×g-PCB	2820.12	1308.92	0.464137	-1.10738	0.000861618
246843_at	hypothetical protein	AT5G26740	AT5G26740	1×g-PCB	µ×g-PCB	1381.75	641.018	0.463918	-1.10806	0.0107732
264423_at	phosphoinositide binding protein	AT1G61690	AT1G61690	1×g-PCB	µ×g-PCB	486.737	225.717	0.463735	-1.10863	0.00258985
266277_at	tropinone reductase-like protein	AT2G29310	AT2G29310	1×g-PCB	µ×g-PCB	507.705	235.405	0.463665	-1.10885	0.00375559
258606_at	hypothetical protein	AT3G02840	AT3G02840	1×g-PCB	µ×g-PCB	6630.82	3073.78	0.46356	-1.10917	0.0319442
245098_at	ERS1 (ETHYLENE RESPONSE SENSOR 1); ethylene binding / protein histidine kinase/ receptor	ERS1	AT2G40940	1×g-PCB	µ×g-PCB	2167.69	1004.72	0.463499	-1.10936	0.0241646
256821_at	DHHC-type zinc finger family protein	AT3G22180	AT3G22180	1×g-PCB	µ×g-PCB	89.1124	41.2835	0.463274	-1.11006	0.00609337
256374_at	DNA ligase 6	LIG6	AT1G66730	1×g-PCB	µ×g-PCB	232.036	107.456	0.463103	-1.1106	0.0120524
248166_at	WD40 domain-containing protein	AT5G54520	AT5G54520	1×g-PCB	µ×g-PCB	236.554	109.54	0.463065	-1.11071	0.0153584
256044_at	putative protein phosphatase 2C 2	AT1G07160	AT1G07160	1×g-PCB	µ×g-PCB	434.078	200.881	0.462776	-1.11161	0.00019249
246999_at	NPY3 (NAKED PINS IN YUC MUTANTS 3); protein binding / signal transducer	NPY3	AT5G67440	1×g-PCB	µ×g-PCB	601.517	277.938	0.462062	-1.11384	0.00101752
[truncated: 1,464 more rows]
