# Supplementary material for: Molecular Basis to Integrate Microgravity Signals into the Photoperiodic Flowering Pathway in Arabidopsis thaliana under Spaceflight Condition
Source: Int J Mol Sci. 2021 Dec 22;23(1):63. doi: 10.3390/ijms23010063 (PMC8744661; doi:10.3390/ijms23010063)
Supplement: Supplementary file 1 [file ijms-23-00063-s001.zip › Supplementary Table S2.xlsx]

## Sheet: Introduction
Table S2 Go terms overrepresented in the spaceflight response of the leaves in comparison with the ground controls . Overrepresentation was determined for genes where the response was log2 FC>1 and P<0.05. GO terms with FDR <0.05.
Analysis Type:	PANTHER Overrepresentation Test (Released 20210224)
Annotation Version and Release Date:	PANTHER version 16.0 Released 2020-12-01
Analyzed List:	Client Text Box Input (Arabidopsis thaliana)
Reference List:	Arabidopsis thaliana (all genes in database)
Test Type:	FISHER
Correction:	FDR

## Sheet: up-regulated genes
Table S2a Go terms overrepresented the up-regulated genes in the spaceflight samples in comparison with that of the ground controls .
	REFLIST (27462)	Input (1348)	Client Text Box Input
PANTHER GO-Slim Biological Process	#	#	expected	Over/under	fold Enrichment	raw P-value	FDR
glycosaminoglycan biosynthetic process (GO:0006024)	5	3	0.25	+	12.22	0.00479	0.048
aminoglycan biosynthetic process (GO:0006023)	5	3	0.25	+	12.22	0.00479	0.0477
glycosaminoglycan metabolic process (GO:0030203)	5	3	0.25	+	12.22	0.00479	0.0474
response to heat (GO:0009408)	26	15	1.28	+	11.75	2.1e-10	5.36e-08
cellular response to heat (GO:0034605)	13	7	0.64	+	10.97	2.19e-05	0.00067
response to wounding (GO:0009611)	16	6	0.79	+	7.64	0.000405	0.00674
response to temperature stimulus (GO:0009266)	44	16	2.16	+	7.41	1.03e-08	1.05e-06
protein stabilization (GO:0050821)	17	6	0.83	+	7.19	0.000527	0.00867
regulation of defense response (GO:0031347)	22	7	1.08	+	6.48	0.000304	0.00555
regulation of protein stability (GO:0031647)	19	6	0.93	+	6.43	0.000853	0.0126
response to unfolded protein (GO:0006986)	29	9	1.42	+	6.32	4.98e-05	0.00136
cellular response to unfolded protein (GO:0034620)	29	9	1.42	+	6.32	4.98e-05	0.00134
aromatic amino acid family biosynthetic process (GO:0009073)	41	11	2.01	+	5.47	2.32e-05	0.000698
response to inorganic substance (GO:0010035)	54	14	2.65	+	5.28	2.59e-06	0.000104
protein folding (GO:0006457)	137	32	6.72	+	4.76	1.27e-11	6.5e-09
response to osmotic stress (GO:0006970)	43	10	2.11	+	4.74	0.000151	0.00316
purine ribonucleoside diphosphate metabolic process (GO:0009179)	39	9	1.91	+	4.7	0.000337	0.00606
purine nucleoside diphosphate metabolic process (GO:0009135)	39	9	1.91	+	4.7	0.000337	0.00599
ATP generation from ADP (GO:0006757)	39	9	1.91	+	4.7	0.000337	0.00592
glycolytic process (GO:0006096)	39	9	1.91	+	4.7	0.000337	0.00586
ADP metabolic process (GO:0046031)	39	9	1.91	+	4.7	0.000337	0.00579
glutathione metabolic process (GO:0006749)	40	9	1.96	+	4.58	0.000395	0.00673
aromatic amino acid family metabolic process (GO:0009072)	50	11	2.45	+	4.48	0.000109	0.0025
response to oxidative stress (GO:0006979)	64	14	3.14	+	4.46	1.39e-05	0.000463
chaperone-mediated protein folding (GO:0061077)	51	11	2.5	+	4.39	0.000127	0.00287
nucleoside diphosphate phosphorylation (GO:0006165)	42	9	2.06	+	4.37	0.000538	0.00877
organophosphate catabolic process (GO:0046434)	28	6	1.37	+	4.37	0.00452	0.0456
nucleotide phosphorylation (GO:0046939)	42	9	2.06	+	4.37	0.000538	0.00868
nucleoside diphosphate metabolic process (GO:0009132)	52	11	2.55	+	4.31	0.000148	0.00319
ribonucleoside diphosphate metabolic process (GO:0009185)	43	9	2.11	+	4.26	0.000624	0.00966
regulation of response to stress (GO:0080134)	43	9	2.11	+	4.26	0.000624	0.00956
'de novo' protein folding (GO:0006458)	46	9	2.26	+	3.99	0.000952	0.0139
response to oxygen-containing compound (GO:1901700)	155	29	7.61	+	3.81	9.69e-09	1.06e-06
cellular response to topologically incorrect protein (GO:0035967)	49	9	2.41	+	3.74	0.00141	0.0196
response to topologically incorrect protein (GO:0035966)	49	9	2.41	+	3.74	0.00141	0.0194
interspecies interaction between organisms (GO:0044419)	104	19	5.1	+	3.72	4.49e-06	0.000176
hexose metabolic process (GO:0019318)	44	8	2.16	+	3.7	0.0027	0.0311
defense response (GO:0006952)	138	25	6.77	+	3.69	1.71e-07	1.31e-05
response to external biotic stimulus (GO:0043207)	100	18	4.91	+	3.67	9.5e-06	0.000346
response to other organism (GO:0051707)	100	18	4.91	+	3.67	9.5e-06	0.000338
response to biotic stimulus (GO:0009607)	100	18	4.91	+	3.67	9.5e-06	0.00033
defense response to other organism (GO:0098542)	100	18	4.91	+	3.67	9.5e-06	0.000323
cellular amino acid biosynthetic process (GO:0008652)	118	21	5.79	+	3.63	2.08e-06	8.83e-05
defense response to bacterium (GO:0042742)	79	14	3.88	+	3.61	0.000105	0.00247
response to bacterium (GO:0009617)	79	14	3.88	+	3.61	0.000105	0.00243
cellular modified amino acid metabolic process (GO:0006575)	74	13	3.63	+	3.58	0.000198	0.00398
alpha-amino acid metabolic process (GO:1901605)	149	25	7.31	+	3.42	6.07e-07	3.72e-05
monosaccharide metabolic process (GO:0005996)	54	9	2.65	+	3.4	0.00254	0.0306
sulfur compound metabolic process (GO:0006790)	158	26	7.76	+	3.35	5.06e-07	3.23e-05
response to abiotic stimulus (GO:0009628)	176	28	8.64	+	3.24	3.45e-07	2.4e-05
monocarboxylic acid metabolic process (GO:0032787)	164	26	8.05	+	3.23	9.48e-07	5e-05
cellular lipid catabolic process (GO:0044242)	64	10	3.14	+	3.18	0.00229	0.0285
lipid catabolic process (GO:0016042)	64	10	3.14	+	3.18	0.00229	0.0283
fatty acid metabolic process (GO:0006631)	58	9	2.85	+	3.16	0.00388	0.0402
carboxylic acid biosynthetic process (GO:0046394)	176	27	8.64	+	3.13	1.04e-06	5.31e-05
organic acid biosynthetic process (GO:0016053)	176	27	8.64	+	3.13	1.04e-06	5.14e-05
response to chemical (GO:0042221)	312	45	15.31	+	2.94	1.72e-09	2.93e-07
small molecule biosynthetic process (GO:0044283)	260	37	12.76	+	2.9	6.4e-08	6.13e-06
oxidation-reduction process (GO:0055114)	262	37	12.86	+	2.88	7.62e-08	6.86e-06
regulation of response to stimulus (GO:0048583)	79	11	3.88	+	2.84	0.00317	0.0352
small molecule catabolic process (GO:0044282)	137	19	6.72	+	2.83	0.000132	0.00293
response to external stimulus (GO:0009605)	150	20	7.36	+	2.72	0.000144	0.00314
ATP metabolic process (GO:0046034)	90	12	4.42	+	2.72	0.00291	0.0327
cellular response to oxygen-containing compound (GO:1901701)	83	11	4.07	+	2.7	0.00445	0.0451
cellular carbohydrate metabolic process (GO:0044262)	144	19	7.07	+	2.69	0.000235	0.00438
carbohydrate metabolic process (GO:0005975)	267	35	13.11	+	2.67	1.3e-06	6.03e-05
carboxylic acid metabolic process (GO:0019752)	438	57	21.5	+	2.65	4.51e-10	9.86e-08
organic acid metabolic process (GO:0006082)	463	60	22.73	+	2.64	1.75e-10	6.71e-08
oxoacid metabolic process (GO:0043436)	463	60	22.73	+	2.64	1.75e-10	5.37e-08
cellular response to organic substance (GO:0071310)	156	20	7.66	+	2.61	0.00023	0.00434
cellular response to chemical stimulus (GO:0070887)	211	27	10.36	+	2.61	3.16e-05	0.000879
cellular amino acid metabolic process (GO:0006520)	231	29	11.34	+	2.56	1.82e-05	0.000582
small molecule metabolic process (GO:0044281)	773	95	37.94	+	2.5	1.94e-14	2.96e-11
generation of precursor metabolites and energy (GO:0006091)	166	20	8.15	+	2.45	0.000606	0.00947
response to organic substance (GO:0010033)	230	27	11.29	+	2.39	8.44e-05	0.00212
purine-containing compound metabolic process (GO:0072521)	164	19	8.05	+	2.36	0.00115	0.0164
organic hydroxy compound metabolic process (GO:1901615)	162	18	7.95	+	2.26	0.00221	0.0277
nucleobase-containing small molecule metabolic process (GO:0055086)	239	25	11.73	+	2.13	0.000997	0.0144
organophosphate metabolic process (GO:0019637)	336	35	16.49	+	2.12	9.36e-05	0.00231
response to stress (GO:0006950)	658	67	32.3	+	2.07	1.5e-07	1.21e-05
transmembrane transport (GO:0055085)	266	27	13.06	+	2.07	0.000754	0.0114
carbohydrate derivative metabolic process (GO:1901135)	348	33	17.08	+	1.93	0.000819	0.0123
phosphorylation (GO:0016310)	571	53	28.03	+	1.89	3.11e-05	0.000882
response to stimulus (GO:0050896)	1216	110	59.69	+	1.84	5.02e-09	6.99e-07
phosphorus metabolic process (GO:0006793)	942	84	46.24	+	1.82	7.69e-07	4.53e-05
lipid metabolic process (GO:0006629)	362	32	17.77	+	1.8	0.00246	0.0302
phosphate-containing compound metabolic process (GO:0006796)	926	81	45.45	+	1.78	2.08e-06	8.6e-05
signal transduction (GO:0007165)	455	38	22.33	+	1.7	0.0025	0.0303
signaling (GO:0023052)	460	38	22.58	+	1.68	0.00356	0.0373
cell communication (GO:0007154)	488	40	23.95	+	1.67	0.00331	0.0362
cellular response to stimulus (GO:0051716)	835	63	40.99	+	1.54	0.00165	0.0223
organonitrogen compound metabolic process (GO:1901564)	2493	157	122.37	+	1.28	0.00198	0.0257
biological_process (GO:0008150)	7554	470	370.8	+	1.27	8.06e-09	9.5e-07
cellular process (GO:0009987)	6666	408	327.21	+	1.25	1.12e-06	5.35e-05
metabolic process (GO:0008152)	5172	299	253.87	+	1.18	0.00279	0.0319
Unclassified (UNCLASSIFIED)	19908	878	977.2	-	0.9	8.06e-09	1.03e-06
cellular macromolecule metabolic process (GO:0044260)	3057	114	150.06	-	0.76	0.00179	0.0234
organic cyclic compound metabolic process (GO:1901360)	2359	85	115.79	-	0.73	0.00264	0.0306
cellular aromatic compound metabolic process (GO:0006725)	2308	83	113.29	-	0.73	0.00282	0.032
macromolecule metabolic process (GO:0043170)	3791	125	186.09	-	0.67	7.97e-07	4.52e-05
heterocycle metabolic process (GO:0046483)	2250	69	110.44	-	0.62	2.46e-05	0.000724
heterocycle biosynthetic process (GO:0018130)	1236	37	60.67	-	0.61	0.00139	0.0195
macromolecule biosynthetic process (GO:0009059)	1501	43	73.68	-	0.58	0.000149	0.00317
nucleobase-containing compound metabolic process (GO:0006139)	2145	59	105.29	-	0.56	9.43e-07	5.16e-05
nucleobase-containing compound biosynthetic process (GO:0034654)	1166	31	57.23	-	0.54	0.000203	0.00403
cellular macromolecule biosynthetic process (GO:0034645)	1485	39	72.89	-	0.54	2.05e-05	0.00064
macromolecule catabolic process (GO:0009057)	619	15	30.38	-	0.49	0.00313	0.0349
regulation of cellular biosynthetic process (GO:0031326)	961	23	47.17	-	0.49	0.000155	0.00321
regulation of biosynthetic process (GO:0009889)	964	23	47.32	-	0.49	0.000156	0.00319
regulation of cellular macromolecule biosynthetic process (GO:2000112)	949	22	46.58	-	0.47	0.000102	0.00247
regulation of cellular metabolic process (GO:0031323)	1210	28	59.39	-	0.47	9.41e-06	0.000352
regulation of macromolecule biosynthetic process (GO:0010556)	951	22	46.68	-	0.47	0.000102	0.00244
nucleic acid-templated transcription (GO:0097659)	925	21	45.4	-	0.46	8.4e-05	0.00218
transcription, DNA-templated (GO:0006351)	925	21	45.4	-	0.46	8.4e-05	0.00214
regulation of transcription, DNA-templated (GO:0006355)	841	19	41.28	-	0.46	0.000204	0.00401
regulation of nucleic acid-templated transcription (GO:1903506)	841	19	41.28	-	0.46	0.000204	0.00396
regulation of RNA biosynthetic process (GO:2001141)	841	19	41.28	-	0.46	0.000204	0.00391
RNA biosynthetic process (GO:0032774)	935	21	45.9	-	0.46	6.53e-05	0.00172
gene expression (GO:0010467)	1894	42	92.97	-	0.45	3.79e-09	5.81e-07
transcription by RNA polymerase II (GO:0006366)	512	11	25.13	-	0.44	0.00319	0.0352
regulation of metabolic process (GO:0019222)	1366	29	67.05	-	0.43	2.38e-07	1.74e-05
regulation of transcription by RNA polymerase II (GO:0006357)	472	10	23.17	-	0.43	0.00436	0.0448
regulation of nitrogen compound metabolic process (GO:0051171)	1182	25	58.02	-	0.43	1.84e-06	8.06e-05
regulation of primary metabolic process (GO:0080090)	1189	25	58.36	-	0.43	1.4e-06	6.32e-05
regulation of RNA metabolic process (GO:0051252)	930	19	45.65	-	0.42	1.49e-05	0.000486
regulation of macromolecule metabolic process (GO:0060255)	1336	27	65.58	-	0.41	1.16e-07	9.86e-06
regulation of nucleobase-containing compound metabolic process (GO:0019219)	960	19	47.12	-	0.4	6.69e-06	0.000256
RNA metabolic process (GO:0016070)	1659	32	81.43	-	0.39	6.82e-10	1.31e-07
regulation of gene expression (GO:0010468)	1144	22	56.15	-	0.39	3.97e-07	2.64e-05
ubiquitin-dependent protein catabolic process (GO:0006511)	382	7	18.75	-	0.37	0.00356	0.0371
nucleic acid metabolic process (GO:0090304)	1909	34	93.71	-	0.36	1.44e-12	1.1e-09
modification-dependent protein catabolic process (GO:0019941)	404	7	19.83	-	0.35	0.00202	0.026
modification-dependent macromolecule catabolic process (GO:0043632)	414	7	20.32	-	0.34	0.00152	0.0207
positive regulation of cellular metabolic process (GO:0031325)	320	5	15.71	-	0.32	0.00344	0.0374
positive regulation of metabolic process (GO:0009893)	326	5	16	-	0.31	0.00354	0.0374
mRNA metabolic process (GO:0016071)	330	5	16.2	-	0.31	0.00254	0.0304
proteasomal protein catabolic process (GO:0010498)	281	4	13.79	-	0.29	0.00444	0.0453
RNA processing (GO:0006396)	527	7	25.87	-	0.27	2.81e-05	0.000813
ncRNA metabolic process (GO:0034660)	312	4	15.31	-	0.26	0.00177	0.0233
positive regulation of macromolecule metabolic process (GO:0010604)	321	4	15.76	-	0.25	0.00129	0.0182
proteasome-mediated ubiquitin-dependent protein catabolic process (GO:0043161)	270	3	13.25	-	0.23	0.00213	0.0269
DNA metabolic process (GO:0006259)	299	3	14.68	-	0.2	0.000543	0.00867
positive regulation of nitrogen compound metabolic process (GO:0051173)	317	3	15.56	-	0.19	0.000275	0.00507
cellular response to DNA damage stimulus (GO:0006974)	214	2	10.5	-	0.19	0.00505	0.0496
positive regulation of macromolecule biosynthetic process (GO:0010557)	221	2	10.85	-	0.18	0.00351	0.0378
positive regulation of biosynthetic process (GO:0009891)	221	2	10.85	-	0.18	0.00351	0.0376
positive regulation of cellular biosynthetic process (GO:0031328)	221	2	10.85	-	0.18	0.00351	0.0373
positive regulation of nucleic acid-templated transcription (GO:1903508)	188	1	9.23	-	0.11	0.00263	0.0312
positive regulation of transcription, DNA-templated (GO:0045893)	188	1	9.23	-	0.11	0.00263	0.0309
positive regulation of RNA biosynthetic process (GO:1902680)	188	1	9.23	-	0.11	0.00263	0.0307
reproductive process (GO:0022414)	192	1	9.42	-	0.11	0.00174	0.0234
reproduction (GO:0000003)	192	1	9.42	-	0.11	0.00174	0.0232
positive regulation of RNA metabolic process (GO:0051254)	207	1	10.16	-	0.1	0.000831	0.0124
positive regulation of nucleobase-containing compound metabolic process (GO:0045935)	216	1	10.6	-	0.09	0.000574	0.00906
positive regulation of gene expression (GO:0010628)	225	1	11.04	-	0.09	0.000396	0.00667
tRNA metabolic process (GO:0006399)	139	0	6.82	-	< 0.01	0.00207	0.0264
								AT1G25220

## Sheet: down-regulated genes
Table S2b Go terms overrepresented the down-regulated genes in the spaceflight samples in comparison with that of the ground controls .
		REFLIST (27462)	Input (1164)	Client Text Box Input
GO ID	PANTHER GO-Slim Biological Process	#	#	expected	over/under	fold Enrichment	raw P-value	FDR
GO:0043617	cellular response to sucrose starvation	4	4	0.17	+	23.59	0.000167	0.00523
GO:0010322	regulation of isopentenyl diphosphate biosynthetic process, methylerythritol 4-phosphate pathway	3	3	0.13	+	23.59	0.00122	0.0282
GO:0009083	branched-chain amino acid catabolic process	7	4	0.3	+	13.48	0.000713	0.0177
GO:0006552	leucine catabolic process	7	4	0.3	+	13.48	0.000713	0.0178
GO:0042793	plastid transcription	11	5	0.47	+	10.72	0.000331	0.00937
GO:0000184	nuclear-transcribed mRNA catabolic process, nonsense-mediated decay	10	4	0.42	+	9.44	0.00196	0.0428
GO:0009649	entrainment of circadian clock	18	7	0.76	+	9.17	4.56e-05	0.00167
GO:0009583	detection of light stimulus	22	8	0.93	+	8.58	1.92e-05	0.000761
GO:0009585	red, far-red light phototransduction	20	7	0.85	+	8.26	7.84e-05	0.00263
GO:0007602	phototransduction	20	7	0.85	+	8.26	7.84e-05	0.00265
GO:0009081	branched-chain amino acid metabolic process	20	7	0.85	+	8.26	7.84e-05	0.00266
GO:0009581	detection of external stimulus	29	10	1.23	+	8.14	2.57e-06	0.000133
GO:0009582	detection of abiotic stimulus	29	10	1.23	+	8.14	2.57e-06	0.000134
GO:0000373	Group II intron splicing	27	9	1.14	+	7.86	1.03e-05	0.000463
GO:1901259	chloroplast rRNA processing	21	7	0.89	+	7.86	0.000101	0.00331
GO:0009750	response to fructose	15	5	0.64	+	7.86	0.00103	0.0242
GO:0045493	xylan catabolic process	16	5	0.68	+	7.37	0.0013	0.0298
GO:0044347	cell wall polysaccharide catabolic process	17	5	0.72	+	6.94	0.00163	0.0361
GO:0009065	glutamine family amino acid catabolic process	18	5	0.76	+	6.55	0.00201	0.0437
GO:0010017	red or far-red light signaling pathway	51	14	2.16	+	6.48	2.74e-07	1.83e-05
GO:0006573	valine metabolic process	22	6	0.93	+	6.43	0.000779	0.019
GO:0009646	response to absence of light	45	12	1.91	+	6.29	2.51e-06	0.000132
GO:0071489	cellular response to red or far red light	53	14	2.25	+	6.23	4.08e-07	2.61e-05
GO:0006551	leucine metabolic process	23	6	0.97	+	6.15	0.000948	0.0227
GO:0009638	phototropism	24	6	1.02	+	5.9	0.00114	0.0267
GO:0051606	detection of stimulus	64	15	2.71	+	5.53	5.89e-07	3.73e-05
GO:0009063	cellular amino acid catabolic process	95	22	4.03	+	5.46	1.78e-09	1.83e-07
GO:0055081	anion homeostasis	26	6	1.1	+	5.44	0.00163	0.0361
GO:0010268	brassinosteroid homeostasis	27	6	1.14	+	5.24	0.00193	0.0421
GO:0042752	regulation of circadian rhythm	59	13	2.5	+	5.2	5.92e-06	0.000282
GO:0006635	fatty acid beta-oxidation	37	8	1.57	+	5.1	0.000412	0.0112
GO:0010218	response to far red light	44	9	1.86	+	4.83	0.00026	0.00755
GO:0010928	regulation of auxin mediated signaling pathway	44	9	1.86	+	4.83	0.00026	0.00759
GO:0046395	carboxylic acid catabolic process	154	31	6.53	+	4.75	2.05e-11	2.65e-09
GO:0019395	fatty acid oxidation	41	8	1.74	+	4.6	0.000746	0.0183
GO:0071482	cellular response to light stimulus	104	20	4.41	+	4.54	1.4e-07	9.7e-06
GO:0072596	establishment of protein localization to chloroplast	47	9	1.99	+	4.52	0.000399	0.0109
GO:0045036	protein targeting to chloroplast	47	9	1.99	+	4.52	0.000399	0.011
GO:0009637	response to blue light	89	17	3.77	+	4.51	1.3e-06	7.28e-05
GO:0016054	organic acid catabolic process	163	31	6.91	+	4.49	7.17e-11	8.53e-09
GO:0042631	cellular response to water deprivation	38	7	1.61	+	4.35	0.00212	0.0457
GO:0071478	cellular response to radiation	110	20	4.66	+	4.29	3.1e-07	2.05e-05
GO:0009062	fatty acid catabolic process	44	8	1.86	+	4.29	0.00112	0.0262
GO:0072598	protein localization to chloroplast	50	9	2.12	+	4.25	0.000593	0.0152
GO:2000030	regulation of response to red or far red light	45	8	1.91	+	4.19	0.00127	0.0292
GO:0009648	photoperiodism	85	15	3.6	+	4.16	1.25e-05	0.000549
GO:0010411	xyloglucan metabolic process	59	10	2.5	+	4	0.000456	0.0122
GO:1900140	regulation of seedling development	90	15	3.81	+	3.93	2.27e-05	0.000876
GO:0055088	lipid homeostasis	60	10	2.54	+	3.93	0.000513	0.0136
GO:0072329	monocarboxylic acid catabolic process	61	10	2.59	+	3.87	0.000576	0.0148
GO:0009734	auxin-activated signaling pathway	61	10	2.59	+	3.87	0.000576	0.0149
GO:0015994	chlorophyll metabolic process	61	10	2.59	+	3.87	0.000576	0.015
GO:0010027	thylakoid membrane organization	49	8	2.08	+	3.85	0.00205	0.0444
GO:1901606	alpha-amino acid catabolic process	68	11	2.88	+	3.82	0.000344	0.00969
GO:0010029	regulation of seed germination	87	14	3.69	+	3.8	5.91e-05	0.00207
GO:0071214	cellular response to abiotic stimulus	189	30	8.01	+	3.74	6.26e-09	5.56e-07
GO:0104004	cellular response to environmental stimulus	189	30	8.01	+	3.74	6.26e-09	5.65e-07
GO:0009744	response to sucrose	70	11	2.97	+	3.71	0.000428	0.0116
GO:0009639	response to red or far red light	205	32	8.69	+	3.68	2.84e-09	2.68e-07
GO:0071365	cellular response to auxin stimulus	84	13	3.56	+	3.65	0.000152	0.00479
GO:0009642	response to light intensity	143	22	6.06	+	3.63	1.02e-06	5.83e-05
GO:0031146	SCF-dependent proteasomal ubiquitin-dependent protein catabolic process	85	13	3.6	+	3.61	0.000169	0.00527
GO:0034285	response to disaccharide	72	11	3.05	+	3.6	0.00053	0.0139
GO:0010114	response to red light	66	10	2.8	+	3.57	0.000992	0.0236
GO:0006778	porphyrin-containing compound metabolic process	74	11	3.14	+	3.51	0.00065	0.0165
GO:0009606	tropism	122	18	5.17	+	3.48	1.59e-05	0.000665
GO:0009739	response to gibberellin	109	16	4.62	+	3.46	4.88e-05	0.00175
GO:0033013	tetrapyrrole metabolic process	76	11	3.22	+	3.41	0.000793	0.0193
GO:0009914	hormone transport	98	14	4.15	+	3.37	0.000183	0.00565
GO:2000028	regulation of photoperiodism, flowering	70	10	2.97	+	3.37	0.00148	0.0333
GO:0044282	small molecule catabolic process	239	34	10.13	+	3.36	7.53e-09	6.5e-07
GO:0048573	photoperiodism, flowering	71	10	3.01	+	3.32	0.00163	0.0363
GO:0009723	response to ethylene	159	22	6.74	+	3.26	4.82e-06	0.000231
GO:0009743	response to carbohydrate	153	21	6.49	+	3.24	8.78e-06	0.000399
GO:0060918	auxin transport	95	13	4.03	+	3.23	0.000446	0.0121
GO:0009738	abscisic acid-activated signaling pathway	104	14	4.41	+	3.18	0.000318	0.00909
GO:0044242	cellular lipid catabolic process	105	14	4.45	+	3.15	0.000347	0.00973
GO:0010410	hemicellulose metabolic process	113	15	4.79	+	3.13	0.000226	0.00672
GO:0009630	gravitropism	93	12	3.94	+	3.04	0.00116	0.0268
GO:0031668	cellular response to extracellular stimulus	221	28	9.37	+	2.99	1.27e-06	7.17e-05
GO:0000375	RNA splicing, via transesterification reactions	238	30	10.09	+	2.97	5.9e-07	3.65e-05
GO:0000377	RNA splicing, via transesterification reactions with bulged adenosine as nucleophile	238	30	10.09	+	2.97	5.9e-07	3.69e-05
GO:0097306	cellular response to alcohol	137	17	5.81	+	2.93	0.000185	0.00565
GO:0071215	cellular response to abscisic acid stimulus	137	17	5.81	+	2.93	0.000185	0.00568
GO:0009416	response to light stimulus	722	89	30.6	+	2.91	1.8e-17	6.69e-15
GO:0071496	cellular response to external stimulus	227	28	9.62	+	2.91	2.03e-06	0.000108
GO:0010228	vegetative to reproductive phase transition of meristem	179	22	7.59	+	2.9	2.57e-05	0.000986
GO:0016042	lipid catabolic process	114	14	4.83	+	2.9	0.000728	0.018
GO:0009991	response to extracellular stimulus	271	33	11.49	+	2.87	3.35e-07	2.16e-05
GO:2000026	regulation of multicellular organismal development	371	45	15.73	+	2.86	2.88e-09	2.67e-07
GO:0009657	plastid organization	315	38	13.35	+	2.85	5.5e-08	3.94e-06
GO:0009658	chloroplast organization	240	29	10.17	+	2.85	1.95e-06	0.000105
GO:0031669	cellular response to nutrient levels	182	22	7.71	+	2.85	3.23e-05	0.00121
GO:0009267	cellular response to starvation	166	20	7.04	+	2.84	7.56e-05	0.00258
GO:0009314	response to radiation	746	89	31.62	+	2.81	1.11e-16	3.65e-14
GO:0042594	response to starvation	202	24	8.56	+	2.8	1.87e-05	0.00075
GO:0009629	response to gravity	101	12	4.28	+	2.8	0.00219	0.0469
GO:0048580	regulation of post-embryonic development	357	42	15.13	+	2.78	2.12e-08	1.73e-06
GO:0031667	response to nutrient levels	231	27	9.79	+	2.76	7.56e-06	0.000351
GO:0016567	protein ubiquitination	696	81	29.5	+	2.75	1.58e-14	2.77e-12
GO:0008380	RNA splicing	293	33	12.42	+	2.66	1.62e-06	8.9e-05
GO:0009909	regulation of flower development	160	18	6.78	+	2.65	0.000363	0.0101
GO:0032446	protein modification by small protein conjugation	728	81	30.86	+	2.63	8.83e-14	1.42e-11
GO:0010817	regulation of hormone levels	264	29	11.19	+	2.59	1.53e-05	0.000652
GO:0097305	response to alcohol	466	51	19.75	+	2.58	6.48e-09	5.67e-07
GO:0010383	cell wall polysaccharide metabolic process	147	16	6.23	+	2.57	0.00104	0.0243
GO:0009755	hormone-mediated signaling pathway	448	48	18.99	+	2.53	3.18e-08	2.43e-06
GO:0048585	negative regulation of response to stimulus	233	25	9.88	+	2.53	7.99e-05	0.00267
GO:0070647	protein modification by small protein conjugation or removal	815	87	34.54	+	2.52	1.09e-13	1.7e-11
GO:0009737	response to abscisic acid	461	49	19.54	+	2.51	4e-08	2.98e-06
GO:0051239	regulation of multicellular organismal process	461	49	19.54	+	2.51	4e-08	3.01e-06
GO:0071396	cellular response to lipid	320	34	13.56	+	2.51	4.02e-06	0.000198
GO:0015979	photosynthesis	188	20	7.97	+	2.51	0.000515	0.0136
GO:0048831	regulation of shoot system development	172	18	7.29	+	2.47	0.00115	0.0268
GO:0032870	cellular response to hormone stimulus	515	53	21.83	+	2.43	2.15e-08	1.73e-06
GO:0033993	response to lipid	781	80	33.1	+	2.42	7.57e-12	1.02e-09
GO:0009966	regulation of signal transduction	331	34	14.03	+	2.42	1.1e-05	0.000494
GO:0021700	developmental maturation	206	21	8.73	+	2.41	0.000493	0.0132
GO:0044248	cellular catabolic process	1262	128	53.49	+	2.39	4.81e-18	1.91e-15
GO:0050793	regulation of developmental process	800	81	33.91	+	2.39	8.17e-12	1.08e-09
GO:0023051	regulation of signaling	337	34	14.28	+	2.38	1.31e-05	0.000571
GO:0045892	negative regulation of transcription, DNA-templated	277	28	11.74	+	2.38	6e-05	0.00209
GO:0071695	anatomical structure maturation	188	19	7.97	+	2.38	0.00102	0.0242
GO:0006397	mRNA processing	299	30	12.67	+	2.37	5.21e-05	0.00186
GO:1903507	negative regulation of nucleic acid-templated transcription	279	28	11.83	+	2.37	0.000103	0.00333
GO:1902679	negative regulation of RNA biosynthetic process	279	28	11.83	+	2.37	0.000103	0.00335
GO:0009628	response to abiotic stimulus	2061	206	87.36	+	2.36	1.23e-28	3.66e-25
GO:0016071	mRNA metabolic process	439	44	18.61	+	2.36	1.01e-06	5.84e-05
GO:0031327	negative regulation of cellular biosynthetic process	390	39	16.53	+	2.36	3.1e-06	0.000159
GO:0010646	regulation of cell communication	340	34	14.41	+	2.36	1.47e-05	0.000627
GO:0009733	response to auxin	320	32	13.56	+	2.36	2.78e-05	0.00105
GO:0009409	response to cold	392	39	16.62	+	2.35	3.41e-06	0.000173
GO:0000398	mRNA splicing, via spliceosome	212	21	8.99	+	2.34	0.000646	0.0164
GO:0009890	negative regulation of biosynthetic process	396	39	16.78	+	2.32	6.32e-06	0.000296
GO:2000113	negative regulation of cellular macromolecule biosynthetic process	368	36	15.6	+	2.31	1.12e-05	0.000497
GO:0010558	negative regulation of macromolecule biosynthetic process	370	36	15.68	+	2.3	1.87e-05	0.000748
GO:1901565	organonitrogen compound catabolic process	855	83	36.24	+	2.29	3.55e-11	4.4e-09
GO:0048583	regulation of response to stimulus	774	75	32.81	+	2.29	4.77e-10	5.26e-08
GO:0071495	cellular response to endogenous stimulus	547	53	23.19	+	2.29	1.6e-07	1.09e-05
GO:0051253	negative regulation of RNA metabolic process	289	28	12.25	+	2.29	0.000137	0.00441
GO:2000241	regulation of reproductive process	383	37	16.23	+	2.28	1.44e-05	0.000621
GO:0009415	response to water	376	36	15.94	+	2.26	2.16e-05	0.000846
GO:1901701	cellular response to oxygen-containing compound	516	49	21.87	+	2.24	7.62e-07	4.58e-05
GO:1901700	response to oxygen-containing compound	1431	135	60.65	+	2.23	1.33e-16	4.17e-14
GO:0031324	negative regulation of cellular metabolic process	487	46	20.64	+	2.23	2.02e-06	0.000108
GO:0009725	response to hormone	1234	115	52.3	+	2.2	6.53e-14	1.08e-11
GO:0009892	negative regulation of metabolic process	654	61	27.72	+	2.2	7.28e-08	5.15e-06
GO:0009414	response to water deprivation	367	34	15.56	+	2.19	5.82e-05	0.00205
GO:0014070	response to organic cyclic compound	283	26	12	+	2.17	0.000663	0.0167
GO:0051172	negative regulation of nitrogen compound metabolic process	436	40	18.48	+	2.16	1.74e-05	0.000709
GO:0045934	negative regulation of nucleobase-containing compound metabolic process	317	29	13.44	+	2.16	0.000275	0.00795
GO:0071453	cellular response to oxygen levels	240	22	10.17	+	2.16	0.00135	0.0307
GO:0009719	response to endogenous stimulus	1264	115	53.58	+	2.15	2.32e-13	3.36e-11
GO:0010605	negative regulation of macromolecule metabolic process	604	55	25.6	+	2.15	6.21e-07	3.81e-05
GO:0001101	response to acid chemical	408	37	17.29	+	2.14	4.69e-05	0.0017
GO:1901575	organic substance catabolic process	1371	124	58.11	+	2.13	4.81e-14	8.18e-12
GO:0048584	positive regulation of response to stimulus	256	23	10.85	+	2.12	0.00187	0.041
GO:0009056	catabolic process	1506	134	63.83	+	2.1	1.04e-14	1.93e-12
GO:0070482	response to oxygen levels	269	24	11.4	+	2.1	0.00142	0.0322
GO:0044265	cellular macromolecule catabolic process	761	67	32.26	+	2.08	9.3e-08	6.51e-06
GO:0070887	cellular response to chemical stimulus	1117	98	47.34	+	2.07	1.42e-10	1.66e-08
GO:0044264	cellular polysaccharide metabolic process	274	24	11.61	+	2.07	0.0016	0.0359
GO:0071310	cellular response to organic substance	692	60	29.33	+	2.05	7.83e-07	4.66e-05
GO:0044257	cellular protein catabolic process	615	53	26.07	+	2.03	3.87e-06	0.000193
GO:0006970	response to osmotic stress	535	46	22.68	+	2.03	1.75e-05	0.00071
GO:0009651	response to salt stress	453	39	19.2	+	2.03	7.47e-05	0.00257
GO:0010629	negative regulation of gene expression	290	25	12.29	+	2.03	0.00141	0.032
GO:0030163	protein catabolic process	630	54	26.7	+	2.02	4.67e-06	0.000226
GO:0048366	leaf development	339	29	14.37	+	2.02	0.000741	0.0182
GO:0010033	response to organic substance	1639	139	69.47	+	2	1.11e-13	1.69e-11
GO:0040007	growth	444	37	18.82	+	1.97	0.000248	0.00732
GO:0048519	negative regulation of biological process	1132	94	47.98	+	1.96	3.46e-09	3.17e-07
GO:0009266	response to temperature stimulus	614	51	26.02	+	1.96	1.55e-05	0.000656
GO:0051603	proteolysis involved in cellular protein catabolic process	606	50	25.69	+	1.95	2.19e-05	0.000852
GO:0044262	cellular carbohydrate metabolic process	389	32	16.49	+	1.94	0.000699	0.0175
GO:0042221	response to chemical	2530	207	107.24	+	1.93	7.19e-19	3.56e-16
GO:0048518	positive regulation of biological process	1304	106	55.27	+	1.92	1.11e-09	1.16e-07
GO:0048522	positive regulation of cellular process	1043	85	44.21	+	1.92	5.01e-08	3.63e-06
GO:0065008	regulation of biological quality	922	75	39.08	+	1.92	3.15e-07	2.06e-05
GO:0051252	regulation of RNA metabolic process	2290	185	97.06	+	1.91	2.55e-16	6.9e-14
GO:2001141	regulation of RNA biosynthetic process	2184	177	92.57	+	1.91	1.32e-15	3.26e-13
GO:0009893	positive regulation of metabolic process	842	68	35.69	+	1.91	1.42e-06	7.92e-05
GO:0031328	positive regulation of cellular biosynthetic process	567	46	24.03	+	1.91	7.13e-05	0.00247
GO:0006511	ubiquitin-dependent protein catabolic process	531	43	22.51	+	1.91	0.000152	0.00482
GO:1903506	regulation of nucleic acid-templated transcription	2182	176	92.49	+	1.9	2.04e-15	4.49e-13
GO:0006355	regulation of transcription, DNA-templated	2182	176	92.49	+	1.9	2.04e-15	4.67e-13
GO:0009891	positive regulation of biosynthetic process	584	47	24.75	+	1.9	8.72e-05	0.00288
GO:0009057	macromolecule catabolic process	910	73	38.57	+	1.89	9.2e-07	5.42e-05
GO:0016049	cell growth	386	31	16.36	+	1.89	0.00154	0.0345
GO:0006508	proteolysis	829	66	35.14	+	1.88	3.99e-06	0.000198
GO:0009889	regulation of biosynthetic process	2525	200	107.02	+	1.87	9.41e-17	3.29e-14
GO:0031326	regulation of cellular biosynthetic process	2488	197	105.46	+	1.87	1.52e-16	4.52e-14
GO:0009605	response to external stimulus	1527	121	64.72	+	1.87	2.89e-10	3.31e-08
GO:0031325	positive regulation of cellular metabolic process	783	62	33.19	+	1.87	8.01e-06	0.000369
GO:0010604	positive regulation of macromolecule metabolic process	759	60	32.17	+	1.87	1.31e-05	0.000573
GO:0019941	modification-dependent protein catabolic process	543	43	23.02	+	1.87	0.000193	0.00584
GO:0010557	positive regulation of macromolecule biosynthetic process	531	42	22.51	+	1.87	0.000245	0.00725
GO:0010556	regulation of macromolecule biosynthetic process	2387	188	101.18	+	1.86	1.42e-15	3.38e-13
GO:0019219	regulation of nucleobase-containing compound metabolic process	2346	185	99.44	+	1.86	2.87e-15	5.9e-13
GO:0048608	reproductive structure development	1220	96	51.71	+	1.86	2.81e-08	2.17e-06
GO:2000112	regulation of cellular macromolecule biosynthetic process	2374	186	100.62	+	1.85	4.06e-15	7.78e-13
GO:0061458	reproductive system development	1222	96	51.8	+	1.85	4.08e-08	3e-06
GO:0048523	negative regulation of cellular process	780	61	33.06	+	1.85	1.69e-05	0.0007
GO:0018130	heterocycle biosynthetic process	690	54	29.25	+	1.85	4.39e-05	0.00162
GO:0034654	nucleobase-containing compound biosynthetic process	498	39	21.11	+	1.85	0.000541	0.0141
GO:0031323	regulation of cellular metabolic process	2942	230	124.7	+	1.84	1.02e-18	4.34e-16
GO:0010468	regulation of gene expression	2619	204	111.01	+	1.84	2e-16	5.68e-14
GO:0045935	positive regulation of nucleobase-containing compound metabolic process	576	45	24.41	+	1.84	0.000191	0.0058
GO:0043632	modification-dependent macromolecule catabolic process	555	43	23.52	+	1.83	0.000327	0.00932
GO:0009791	post-embryonic development	1500	116	63.58	+	1.82	2.5e-09	2.4e-07
GO:0010035	response to inorganic substance	727	56	30.81	+	1.82	4.64e-05	0.00169
GO:0051254	positive regulation of RNA metabolic process	558	43	23.65	+	1.82	0.000347	0.0097
GO:0051173	positive regulation of nitrogen compound metabolic process	729	56	30.9	+	1.81	4.83e-05	0.00174
GO:1903508	positive regulation of nucleic acid-templated transcription	494	38	20.94	+	1.81	0.000802	0.0193
GO:1902680	positive regulation of RNA biosynthetic process	494	38	20.94	+	1.81	0.000802	0.0194
GO:0019222	regulation of metabolic process	3259	249	138.14	+	1.8	3.4e-19	2.25e-16
GO:0051171	regulation of nitrogen compound metabolic process	2703	205	114.57	+	1.79	2.58e-15	5.48e-13
GO:0006396	RNA processing	807	61	34.21	+	1.78	3.55e-05	0.00132
GO:0080090	regulation of primary metabolic process	2784	209	118	+	1.77	3.96e-15	7.85e-13
GO:0045893	positive regulation of transcription, DNA-templated	492	37	20.85	+	1.77	0.00166	0.0366
GO:0060255	regulation of macromolecule metabolic process	2985	223	126.52	+	1.76	5.5e-16	1.42e-13
GO:0033554	cellular response to stress	1142	85	48.4	+	1.76	1.84e-06	0.000101
GO:0019637	organophosphate metabolic process	578	43	24.5	+	1.76	0.0009	0.0216
GO:0048731	system development	1919	142	81.34	+	1.75	5.93e-10	6.41e-08
GO:0042592	homeostatic process	484	36	20.51	+	1.75	0.00223	0.0478
GO:0010154	fruit development	760	56	32.21	+	1.74	0.000142	0.00456
GO:0003006	developmental process involved in reproduction	1458	106	61.8	+	1.72	2.31e-07	1.56e-05
GO:1901362	organic cyclic compound biosynthetic process	863	63	36.58	+	1.72	8.69e-05	0.00289
GO:0048367	shoot system development	742	54	31.45	+	1.72	0.000249	0.00729
GO:0019438	aromatic compound biosynthetic process	775	55	32.85	+	1.67	0.000455	0.0123
GO:0048316	seed development	733	52	31.07	+	1.67	0.000635	0.0162
GO:0016070	RNA metabolic process	1321	93	55.99	+	1.66	6.15e-06	0.000291
GO:0050789	regulation of biological process	5393	371	228.59	+	1.62	5.47e-22	5.42e-19
GO:0050794	regulation of cellular process	4738	326	200.82	+	1.62	8.09e-19	3.7e-16
GO:0048856	anatomical structure development	2895	199	122.71	+	1.62	4.14e-11	5.02e-09
GO:0043436	oxoacid metabolic process	976	67	41.37	+	1.62	0.000224	0.00671
GO:0019752	carboxylic acid metabolic process	874	60	37.05	+	1.62	0.000514	0.0136
GO:0065007	biological regulation	5947	406	252.07	+	1.61	5.45e-24	1.08e-20
GO:0032502	developmental process	3037	207	128.73	+	1.61	2.92e-11	3.69e-09
GO:0007275	multicellular organism development	2502	171	106.05	+	1.61	1.95e-09	1.97e-07
GO:0006464	cellular protein modification process	2489	170	105.5	+	1.61	2.43e-09	2.37e-07
GO:0036211	protein modification process	2489	170	105.5	+	1.61	2.43e-09	2.41e-07
GO:0006082	organic acid metabolic process	1009	69	42.77	+	1.61	0.000205	0.00616
GO:0050896	response to stimulus	5474	371	232.02	+	1.6	5.93e-21	5.04e-18
GO:0007154	cell communication	1688	113	71.55	+	1.58	4.51e-06	0.00022
GO:0051716	cellular response to stimulus	2579	172	109.31	+	1.57	1.07e-08	8.93e-07
GO:0044281	small molecule metabolic process	1516	101	64.26	+	1.57	1.73e-05	0.000708
GO:0006996	organelle organization	1696	112	71.89	+	1.56	8.55e-06	0.000391
GO:0006950	response to stress	3187	209	135.08	+	1.55	6.08e-10	6.46e-08
GO:1901564	organonitrogen compound metabolic process	4632	303	196.33	+	1.54	1.45e-14	2.61e-12
GO:0099402	plant organ development	1054	69	44.67	+	1.54	0.000663	0.0167
GO:0043412	macromolecule modification	2815	183	119.32	+	1.53	1.65e-08	1.37e-06
GO:0032501	multicellular organismal process	2795	181	118.47	+	1.53	2.64e-08	2.06e-06
GO:0006807	nitrogen compound metabolic process	6198	400	262.71	+	1.52	3.71e-19	2.21e-16
GO:0022414	reproductive process	1754	113	74.34	+	1.52	2.07e-05	0.000817
GO:0007165	signal transduction	1394	90	59.09	+	1.52	0.000149	0.00474
GO:0000003	reproduction	1764	113	74.77	+	1.51	2.8e-05	0.00106
GO:0046483	heterocycle metabolic process	2399	153	101.68	+	1.5	9.51e-07	5.55e-05
GO:0044237	cellular metabolic process	7691	487	325.99	+	1.49	5.18e-23	7.7e-20
GO:1901360	organic cyclic compound metabolic process	2614	165	110.8	+	1.49	6.55e-07	3.97e-05
GO:0010467	gene expression	1633	103	69.22	+	1.49	0.000123	0.00397
GO:0023052	signaling	1433	90	60.74	+	1.48	0.000389	0.0108
GO:0043170	macromolecule metabolic process	5517	343	233.84	+	1.47	1.18e-13	1.75e-11
GO:0019538	protein metabolic process	3537	221	149.92	+	1.47	9.43e-09	8.01e-07
GO:0044267	cellular protein metabolic process	3385	211	143.48	+	1.47	2.5e-08	1.98e-06
GO:0071704	organic substance metabolic process	7889	488	334.38	+	1.46	7.18e-21	5.34e-18
GO:0044238	primary metabolic process	7253	450	307.42	+	1.46	5.77e-19	3.12e-16
GO:0006725	cellular aromatic compound metabolic process	2533	157	107.36	+	1.46	3.6e-06	0.000181
GO:0006139	nucleobase-containing compound metabolic process	2112	131	89.52	+	1.46	2.76e-05	0.00105
GO:0008152	metabolic process	8478	520	359.35	+	1.45	5.44e-22	6.47e-19
GO:0044260	cellular macromolecule metabolic process	4434	273	187.94	+	1.45	3.28e-10	3.69e-08
GO:0090304	nucleic acid metabolic process	1734	106	73.5	+	1.44	0.000303	0.00871
GO:0009987	cellular process	12044	721	510.5	+	1.41	7.76e-34	4.62e-30
GO:0016043	cellular component organization	2445	146	103.63	+	1.41	5.6e-05	0.00198
GO:0034641	cellular nitrogen compound metabolic process	2916	172	123.6	+	1.39	1.69e-05	0.000703
GO:0071840	cellular component organization or biogenesis	2860	163	121.22	+	1.34	0.000172	0.00533
GO:0008150	biological_process	21212	998	899.09	+	1.11	1.24e-12	1.75e-10
